# Supplementary material for: Chiral Aminoalcohols and Squaric Acid Amides as Ligands for Asymmetric Borane Reduction of Ketones: Insight to In Situ Formed Catalytic System by DOSY and Multinuclear NMR Experiments
Source: MDPI journal article supplement (doi:10.3390/molecules26226865), 2021-11-14
Supplement: s1 [file s1]

# Supplementary Materials

for

## Chiral Aminoalcohols and Squaric Acid Amides as Ligands for Asymmetric Borane Reduction of Ketones: Insight to In situ Formed Catalytic System by DOSY and Multinuclear NMR Experiments

Yana Nikolova, Georgi M. Dobrikov, Zhanina Petkova and Pavletta Shestakova

Institute of Organic Chemistry with Centre of Phytochemistry,  
Bulgarian Academy of Sciences, Bl. 9, Acad. G. Bonchev Str., Sofia 1113, Bulgaria

### Experimental procedures, analytical data and NMR spectra

#### Preparation of 3-(benzylamino)-4-ethoxycyclobut-3-en-1,2-dione (**3**)

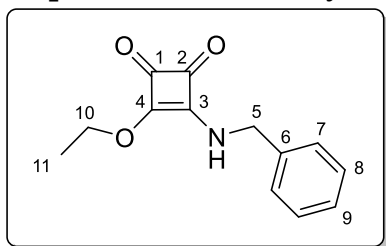

A solution of 3,4-diethoxycyclobut-3-ene-1,2-dione **1** (1.73 mmol, 0.25 ml) and Et<sub>3</sub>N (1.73 mmol, 0.24 ml) in 5 ml EtOH was cooled to 0 °C. Benzylamine was added (1.73 mmol, 0.19 ml) and the reaction mixture was stirred at room temperature for 24 h. The solvent was removed under reduced pressure and the crude product was purified by column chromatography (30 g silica gel, eluent: DCM/MTBE = 10:1) to give 0.39 g (99%) **3** as colorless oil.

#### Analytical and spectral data:

MS (ESI) *m/z* (rel. int.): 232 (100, M+1), 204 (82, M-CH<sub>2</sub>CH<sub>3</sub>). Anal. calcd. for C<sub>13</sub>H<sub>13</sub>NO<sub>3</sub> (231.25): C, 67.52; H, 5.67; N, 6.06. Found: C, 67.55; H, 5.63; N, 6.09 %. <sup>1</sup>H NMR (600.1 MHz, DMSO-d<sub>6</sub>, 373 K): δ = 8.79 (br s, 1H, NH), 7.34-7.38 (m, 2H, H-8), 7.27-7.33 (m, 3H, H-7, H-9), 4.67 (q, 2H, H-10, *J* = 7.0 Hz), 4.60 (br s, 2H, H-5), 1.38 (t, 3H, H-11, *J* = 7.0). <sup>13</sup>C NMR (150.9 MHz, DMSO-d<sub>6</sub>, 373 K): δ = 188.72\* (1C, C-1), 182.04\* (1C, C-2), 176.56\* (1C, C-3), 172.24\* (1C, C-4), 137.74 (1C, C-6), 127.92 (2C, C-8), 126.86 (2C, C-7), 126.81 (1C, C-9), 68.25 (1C, C-10), 46.72 (1C, C-5), 14.82 (1C, C-11).

## Preparation of squaric monoamides 4 and 5

### General procedure:

A solution of 3,4-diethoxycyclobut-3-ene-1,2-dione **1** (7.04 mmol, 1.03 ml) and Et<sub>3</sub>N (7.74 mmol, 1.08 ml) in 20 ml EtOH was cooled to 0 °C. Then the corresponding enantiomer of 2-aminobutan-1-ol **2b** or **2c** (7.04 mmol, 0.66 ml) was added and the resulting mixture was stirred at room temperature for 24 h. The solvent was removed under reduced pressure and the crude product was purified by column chromatography (75 g silica gel, eluent: DCM/acetone = 5:1) to give 1.48 g (99%) **4** or **5** as colorless oil.

### 3-ethoxy-4-(((R)-1-hydroxybutan-2-yl)amino)cyclobut-3-ene-1,2-dione (**4**)

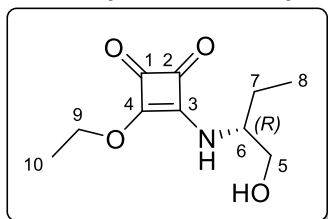

### Analytical and spectral data:

$[\alpha]_D^{20} = +50.2$  (*c* 0.94, CHCl<sub>3</sub>). MS (CI) *m/z* (rel. int.): 214 (M+1, 100). Anal. calcd. for C<sub>10</sub>H<sub>15</sub>NO<sub>4</sub> (213.23): C, 56.33; H, 7.09; N, 6.57. Found: C, 56.37; H, 7.02; N, 6.53 %. <sup>1</sup>H NMR (600.13 MHz, CDCl<sub>3</sub>, 298 K):  $\delta$  = 7.13 (br d, 1H, NH, *J* = 8.9 Hz), 4.84-4.71 (m, 2H, H-9), 3.83-3.76 (m, 1H, H<sub>a</sub>-5), 3.73-3.67 (m, 1H, H<sub>b</sub>-5), 3.67-3.57 (m, 1H, H-6), 2.81 (br s 1H, OH), 1.71-1.53 (m, 2H, H-7), 1.50-1.42 (m, 3H, H-10), 1.02-0.94 (m, 3H, H-8). <sup>13</sup>C NMR (150.92 MHz, CDCl<sub>3</sub>, 298 K):  $\delta$  = 189.86\* (1C, C-1), 182.56\* (1C, C-2), 177.20\* (1C, C-3), 172.46\* (1C, C-4), 69.90 (1C, C-9), 64.23 (1C, C-5), 58.94 (1C, C-6), 24.89 (1C, C-7), 15.82 (1C, C-10), 10.33 (1C, C-8).

### 3-ethoxy-4-(((S)-1-hydroxybutan-2-yl)amino)cyclobut-3-ene-1,2-dione (**5**)

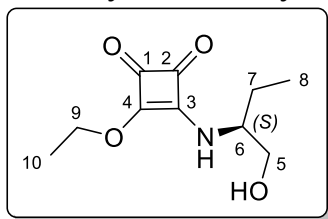

### Analytical and spectral data:

$[\alpha]_D^{20} = -56.1$  (*c* 1.01, CHCl<sub>3</sub>). MS (CI) *m/z* (rel. int.): 214 (M+1, 100). Anal. calcd. for C<sub>10</sub>H<sub>15</sub>NO<sub>4</sub> (213.23): C, 56.33; H, 7.09; N, 6.57. Found: C, 56.27; H, 7.18; N, 6.52 %. <sup>1</sup>H NMR (600.13 MHz, CDCl<sub>3</sub>, 293 K):  $\delta$  = 7.27 (br d, 1H, NH, *J* = 7.3 Hz), 4.83-4.68 (m, 2H, H-9), 3.78 (dd, 1H, H<sub>a</sub>-5, *J* = 11.2 Hz, *J* = 2.9 Hz), 3.73-3.56 (m, 2H, H<sub>b</sub>-5, H-6), 3.01 (br s 1H, OH), 1.69-1.52 (m, 2H, H-7), 1.45 (t, 3H, H-10, *J* = 7.0 Hz), 0.96 (t, 3H, H-8, *J* = 7.4 Hz). <sup>13</sup>C NMR (150.92 MHz, CDCl<sub>3</sub>, 293 K):  $\delta$  = 189.88\* (1C, C-1), 182.52\* (1C, C-2), 177.12\* (1C, C-3), 172.45\* (1C, C-4), 69.88 (1C, C-9), 64.15 (1C, C-5), 58.98 (1C, C-6), 24.84 (1C, C-7), 15.82 (1C, C-10), 10.34 (1C, C-8).

## Preparation of (S)-3-((3,3-dimethylbutan-2-yl)amino)-4-ethoxycyclobut-3-ene-1,2-dione (6)

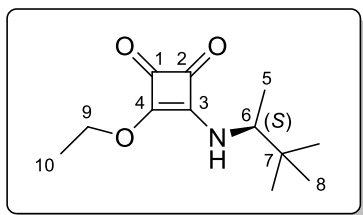

A solution of 3,4-diethoxycyclobut-3-ene-1,2-dione **1** (2.94 mmol, 0.43 ml) and Et<sub>3</sub>N (2.94 mmol, 0.41 ml) in 15 ml EtOH was cooled to 0 °C. 2-amino-2-methylpropan-1-ol was added (2.94 mmol, 0.39 ml) and the reaction mixture was stirred at room temperature for 24 h. The solvent was removed under reduced pressure and the crude product was purified by column chromatography (30 g silica gel, eluent: PE/EtOAc = 2:1) to give 0.64 g (93%) **6** as colorless crystals.

### Analytical and spectral data:

m.p. 133-135 °C.  $[\alpha]_D^{20} = -5.3$  (c 1.08, CHCl<sub>3</sub>). MS (ESI)  $m/z$  (rel. int.): 226 (100, M+1), 198 (23, M-CH<sub>2</sub>CH<sub>3</sub>), 142 (60, M-CH(CH<sub>3</sub>)*t*-Bu), 114 (63, M-CH<sub>2</sub>CH<sub>3</sub>, CH(CH<sub>3</sub>)*t*-Bu). Anal. calcd. for C<sub>12</sub>H<sub>19</sub>NO<sub>3</sub> (225.29): C, 63.98; H, 8.50; N, 6.22. Found: C, 63.94; H, 8.55; N, 6.20 %. <sup>1</sup>H NMR (600.1 MHz, CDCl<sub>3</sub>, 293 K):  $\delta$  = 5.93 (br d, 1H, NH,  $J$  = 8.6 Hz), 4.85-4.70 (m, 2H, H-9), 3.57-3.49 (m, 1H, H-6), 1.46 (t, 3H, H-10,  $J$  = 7.0 Hz), 1.21 (d, 3H, H-5,  $J$  = 6.8 Hz), 0.92 (br s, 9H, H-8). <sup>13</sup>C NMR (150.9 MHz, CDCl<sub>3</sub>, 293 K):  $\delta$  = 189.24\* (1C, C-1), 182.81\* (1C, C-2), 176.51\* (1C, C-3), 171.99\* (1C, C-4), 69.60 (1C, C-9), 59.95 (1C, C-6), 34.91 (1C, C-7), 25.75 (3C, C-8), 16.57 (1C, C-5), 15.89 (1C, C-10).

## Preparation of squaric diamides 7-10

### General procedure:

A solution of monoamide **3-6** (1.0 equiv) in 5 ml EtOH was treated with Et<sub>3</sub>N (1.1 equiv). Then the requisite aminoalcohol (1.0 equiv) was added and the resulting mixture was stirred at room temperature for 24 h. The solvent was removed under reduced pressure and the crude product was purified by column chromatography or crystallization.

### 3-(benzylamino)-4-(((R)-1-hydroxybutan-2-yl)amino)cyclobut-3-ene-1,2-dione (**7b**)

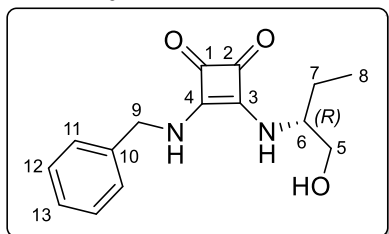

Following the general procedure, the crude product was obtained and then purified by simple filtration and washing with PE to give 0.24 g (93%) **7b** as colorless crystals.

Analytical and spectral data:

m.p. 252-254 °C.  $[\alpha]_D^{20} = +19.7$  (c 1.00, DMSO). MS (CI)  $m/z$  (rel. int.): 275 (M+1, 100). Anal. calcd. for  $C_{15}H_{18}N_2O_3$  (274.32): C, 65.68; H, 6.61; N, 10.21. Found: C, 65.77; H, 6.72; N, 10.17 %.  $^1H$  NMR (600.1 MHz, DMSO- $d_6$ , 313 K):  $\delta$  = 7.73 (br s, 1H, NH), 7.41-7.33 (m, 4H, H-11, H-12), 7.33-7.27 (m, 1H, H-13), 4.83 (br t, 1H, OH,  $J$  = 4.9 Hz), 4.79-4.68 (m, 2H, H-9), 3.98-3.75 (m, 1H, H-6), 3.50-3.41 (m, 2H, H-5), 3.25 (s, 1H, NH), 1.65-1.52 (m, 1H, H<sub>a</sub>-7), 1.52-1.38 (m, 1H, H<sub>b</sub>-7), 0.87 (t, 3H, H-8,  $J$  = 7.5 Hz).  $^{13}C$  NMR (150.9 MHz, DMSO- $d_6$ , 313 K):  $\delta$  = 182.34\* (1C, C-1), 182.26\* (1C, C-2), 168.05\* (1C, C-3), 167.16\* (1C, C-4), 138.87 (1C, C-10), 128.52 (2C, C-12), 127.43 (2C, C-11), 127.28 (1C, C-13), 63.21 (1C, C-5), 56.87 (1C, C-6), 46.73 (1C, C-9), 24.68 (1C, C-7), 10.00 (1C, C-8).

**3-(benzylamino)-4-((((1R,2R,4S)-2-hydroxy-1,3,3-trimethylbicyclo-[2.2.1]heptan-2-yl)methyl)amino)cyclobut-3-ene-1,2-dione (7e)**

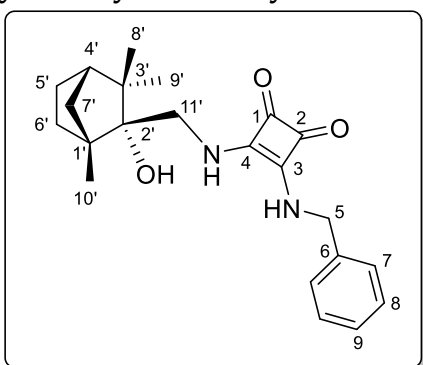

Following the general procedure, the crude product was obtained and then purified by column chromatography (30 g silica gel, eluent: DCM/acetone = 5:1) to give 0.061 g (77%) **7e** as colorless crystals.

Analytical and spectral data:

m.p. 268-269 °C.  $[\alpha]_D^{20} = +18.3$  (c 0.23, DMSO). MS (CI)  $m/z$  (rel. int.): 369 (M+1, 100), 351 (M-OH, 65), 216 (M-fenchol, 23). Anal. calcd. for  $C_{22}H_{28}N_2O_3$  (368.48): C, 71.71; H, 7.66; N, 7.60. Found: C, 71.83; H, 7.55; N, 7.68 %.  $^1H$  NMR (600.1 MHz, DMSO- $d_6$ , 293 K):  $\delta$  = 8.16-8.08 (m, 1H, NH), 7.41-7.36 (m, 2H, H-8), 7.35-7.28 (m, 3H, H-7, H-9), 4.73 (qd, 2H, H-5,  $J$  = 14.7 Hz,  $J$  = 6.2 Hz), 4.27 (s, 1H, OH), 3.88 (dd, 1H, H<sub>a</sub>-11',  $J$  = 13.4 Hz,  $J$  = 7.0 Hz), 3.49 (dd, 1H, H<sub>b</sub>-11',  $J$  = 13.5 Hz,  $J$  = 3.9 Hz), 2.04-1.96 (m, 1H, H<sub>endo</sub>-6'), 1.66-1.56 (m, 2H, H<sub>endo</sub>-5', H<sub>syn</sub>-7'), 1.54 (br d, 1H, H-4',  $J$  = 3.6 Hz), 1.35 (tt, 1H, H<sub>exo</sub>-5',  $J$  = 12.4 Hz,  $J$  = 4.7 Hz), 1.09 (d, 1H, H<sub>anti</sub>-7',  $J$  = 10.0 Hz), 0.97 (overlapped s, 3H, H-8'), 0.96 (overlapped s, 3H, H-10'), 0.93-0.86 (overlapped m, 1H, H<sub>exo</sub>-6'), 0.90 (overlapped s, 3H, H-9').  $^{13}C$  NMR (150.9 MHz, DMSO- $d_6$ , 293 K):  $\delta$  = 182.99\* (1C, C-1), 182.17\* (1C, C-2), 167.69\* (1C, C-3), 167.57\* (1C, C-4), 138.94 (1C, C-6), 128.74 (2C, C-8), 127.55 (2C, C-7), 127.49 (1C, C-9), 78.86 (1C, C-2'), 51.58 (1C, C-1'), 49.25 (1C, C-4'), 48.67 (1C, C-11'), 46.76 (1C, C-5), 43.73 (1C, C-3'), 41.03 (1C, C-7'), 30.11 (1C, C-6'), 26.29 (1C, C-8'), 24.89 (1C, C-5'), 22.67 (1C, C-9'), 17.54 (1C, C-10').

**3-(benzylamino)-4-(((1R,2R,4S)-2-hydroxy-1,3,3-trimethylbicyclo-[2.2.1]heptan-2-yl)ethyl)amino)cyclobut-3-ene-1,2-dione (7f)**

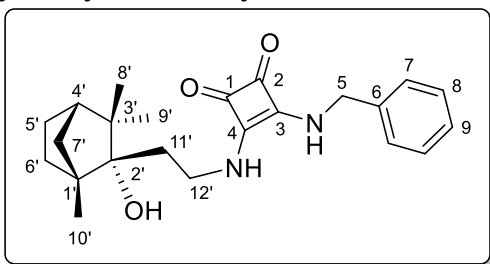

Following the general procedure, the crude product was obtained and then purified by simple filtration and washing with PE to give 0.19 g (97%) **7f** as colorless crystals.

Analytical and spectral data:

m.p. 224-225 °C.  $[\alpha]_D^{20} = -7.1$  (c 1.00, DMSO). MS (CI)  $m/z$  (rel. int.): 383 (M+1, 87), 365 (M-OH, 100), 215 (97), 173 (23), 145 (20). Anal. calcd. for  $C_{23}H_{30}N_2O_3$  (382.50): C, 72.22; H, 7.91; N, 7.32. Found: C, 72.11; H, 8.03; N, 7.23 %.  $^1H$  NMR (600.1 MHz, DMSO- $d_6$ , 298 K):  $\delta$  = 7.70 (br s, 1H, NH), 7.40-7.35 (m, 2H, H-8), 7.35-7.32 (m, 2H, H-7), 7.32-7.27 (m, 1H, H-9), 7.28-7.15 (overlapped m, 1H, NHAr), 4.71 (br d, 2H, H-5,  $J$  = 4.0 Hz), 3.90 (s, 1H, OH), 3.65 (br s, 2H, H-12'), 2.03-1.96 (m, 1H, H<sub>endo</sub>-6'), 1.77 (dt, 1H, H<sub>a</sub>-11',  $J$  = 13.7 Hz,  $J$  = 7.5 Hz), 1.70 (dt, 1H, H<sub>b</sub>-11',  $J$  = 13.8 Hz,  $J$  = 7.8 Hz), 1.63-1.54 (m, 2H, H<sub>endo</sub>-5', H<sub>syn</sub>-7'), 1.51 (d, 1H, H-4',  $J$  = 4.1 Hz), 1.32 (tt, 1H, H<sub>exo</sub>-5',  $J$  = 12.4 Hz,  $J$  = 4.6 Hz), 1.01 (dd, 1H, H<sub>anti</sub>-7',  $J$  = 10.1 Hz,  $J$  = 1.4 Hz), 0.99 (s, 3H, H-8'), 0.96 (s, 3H, H-10'), 0.90-0.83 (overlapped m, 1H, H<sub>exo</sub>-6'), 0.88 (overlapped s, 3H, H-9').  $^{13}C$  NMR (150.9 MHz, DMSO- $d_6$ , 298 K):  $\delta$  = 183.05\* (1C, C-1), 182.50\* (1C, C-2), 168.14\* (1C, C-3), 167.86\* (1C, C-4), 139.45 (1C, C-6), 129.13 (2C, C-8), 128.05 (2C, C-7), 127.90 (1C, C-9), 79.74 (1C, C-2'), 52.88 (1C, C-1'), 49.95 (1C, C-4'), 47.26 (1C, C-5), 44.50 (1C, C-3'), 41.35 (1C, C-12), 41.29 (1C, C-7'), 37.90 (1C, C-11'), 30.61 (1C, C-6'), 28.09 (1C, C-8'), 25.25 (1C, C-5'), 23.06 (1C, C-9'), 18.58 (1C, C-10').

**3-(benzylamino)-4-(((1S,2R,3S,4R)-3-hydroxy-4,7,7-trimethylbicyclo-[2.2.1]heptan-2-yl)amino)cyclobut-3-ene-1,2-dione (7g)**

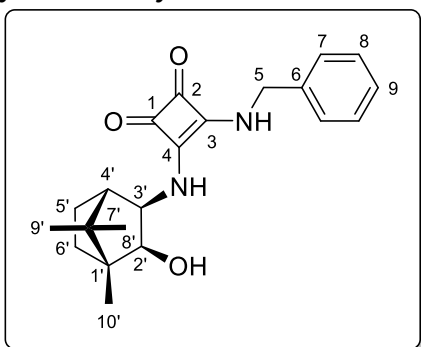

Following the general procedure, the crude product was obtained and then purified by column chromatography (30 g silica gel, eluent: a) DCM/acetone = 5:1, b) DCM/acetone = 1:1) to give 0.09 g (88%) **7g** as colorless crystals.

Analytical and spectral data:

m.p. 114 °C.  $[\alpha]_D^{20} = +66.7$  (c 0.60,  $CHCl_3$ ). MS (CI)  $m/z$  (rel. int.): 355 (M+1, 100). Anal. calcd. for  $C_{21}H_{26}N_2O_3$  (354.45): C, 71.16; H, 7.39; N, 7.90. Found: C, 71.07; H, 7.44; N, 7.97

%.  $^1\text{H}$  NMR (600.1 MHz, DMSO- $d_6$ , 293 K):  $\delta$  = 8.28 (br t, 1H,  $\text{CH}_2\text{NH}$ ,  $J$  = 5.3 Hz), 7.40-7.37 (m, 2H, H-8), 7.34-7.29 (m, 3H, H-7, H-9), 5.58 (d, 1H,  $\text{NH}$ ,  $J$  = 5.7 Hz), 4.77 (dd, 1H,  $\text{H}_a$ -5,  $J$  = 14.5 Hz,  $J$  = 6.5 Hz), 4.67 (dd, 1H,  $\text{H}_b$ -5,  $J$  = 14.5 Hz,  $J$  = 5.7 Hz), 3.99 (t, 1H, H-2',  $J$  = 7.2 Hz), 3.66 (m, 1H, H-3'), 3.34 (s, 1H,  $\text{OH}$ ), 1.71 (br d, 1H, H-4',  $J$  = 4.2 Hz), 1.65-1.58 (m, 1H,  $\text{H}_{\text{exo}}$ -5'), 1.44-1.38 (m, 1H,  $\text{H}_{\text{exo}}$ -6'), 1.10-1.01 (overlapped m, 2H,  $\text{H}_{\text{endo}}$ -6',  $\text{H}_{\text{endo}}$ -5'), 0.99 (s, 3H, H-9'), 0.84 (s, 3H, H-10'), 0.73 (s, 3H, H-8').  $^{13}\text{C}$  NMR (150.9 MHz, DMSO- $d_6$ , 293 K):  $\delta$  = 183.20\* (1C, C-1), 183.11\* (1C, C-2), 167.92\* (1C, C-3), 167.70\* (1C, C-4), 139.43 (1C, C-6), 129.23 (2C, C-8), 128.22 (2C, C-7), 127.99 (1C, C-9), 78.12 (1C, C-3'), 61.20 (1C, C-2'), 53.16 (1C, C-4'), 49.12 (1C, C-7'), 47.24 (1C, C-5), 46.52 (1C, C-1'), 33.06 (1C, C-6'), 26.11 (1C, C-5'), 22.04 (1C, C-8'), 21.57 (1C, C-9'), 12.21 (1C, C-10').

### 3-(benzylamino)-4-(((1S,2S)-1-hydroxy-1-phenylpropan-2-yl)amino)-cyclobut-3-ene-1,2-dione (**7h**)

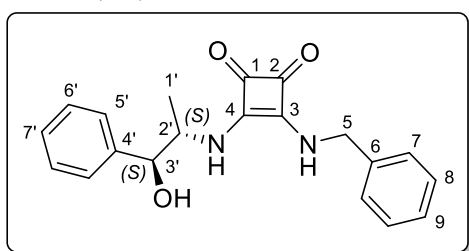

Following the general procedure, the crude product was obtained and then purified by crystallization from EtOH:H<sub>2</sub>O = 2.5:0.5 ml to give 0.033 g (94%) **7h** as colorless crystals.

#### Analytical and spectral data:

m.p. 278 °C (with decomp.).  $[\alpha]_D^{20}$  = +63.3 ( $c$  0.30, DMSO). MS (CI)  $m/z$  (rel. int.): 337 ( $M+1$ , 100), 319 ( $M-\text{OH}$ , 87), 229 ( $M-\text{C}_6\text{H}_5\text{CH}_2\text{OH}$ , 36). Anal. calcd. for  $\text{C}_{20}\text{H}_{20}\text{N}_2\text{O}_3$  (336.39): C, 71.41; H, 5.99; N, 8.33. Found: C, 71.47; H, 6.03; N, 8.38 %.  $^1\text{H}$  NMR (600.1 MHz, DMSO- $d_6$ , 293 K):  $\delta$  = 7.87-7.78 (m, 1H,  $\text{CH}_2\text{NH}$ ), 7.45 (br d, 1H,  $\text{CHNH}$ ,  $J$  = 7.0 Hz), 7.41-7.36 (m, 2H, H-8), 7.34-7.25 (m, 7H, H-7, H-9, H-5', H-6'), 7.23-7.19 (m, 1H, H-7'), 4.67 (br d, 2H, H-5,  $J$  = 5.7 Hz), 4.63 (br s, 1H, 1H, H-3'), 4.25 (br s, 1H, H-2'), 1.25-1.15 (m, 3H, H-1').  $^{13}\text{C}$  NMR (150.9 MHz, DMSO- $d_6$ , 293 K):  $\delta$  = 182.33\* (1C, C-1), 182.16\* (1C, C-2), 167.79\* (1C, C-3), 167.08\* (1C, C-4), 142.96 (1C, C-4'), 139.03 (1C, C-6), 128.71 (2C, C-8), 127.78 (2C, C-7), 127.50 (2C, C-6'), 127.46 (1C, C-9), 127.06 (1C, C-7'), 126.42 (2C, C-5'), 74.57 (1C, C-3'), 54.97 (1C, C-2'), 46.73 (1C, C-5), 19.36 (1C, C-1').

### 3-(benzylamino)-4-((S)-2-(hydroxymethyl)pyrrolidin-1-yl)cyclobut-3-ene-1,2-dione (**7i**)

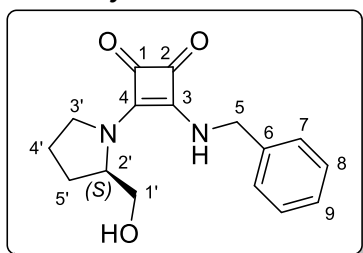

Following the general procedure the crude product was obtained and then purified by column chromatography (30 g silica gel, eluent: DCM/acetone = 2:1) to give 0.11 g (85%) **7i** as colorless crystals.

Analytical and spectral data:

m.p. 153-155 °C.  $[\alpha]_D^{20} = -78.2$  (c 0.95, DMSO). MS (CI)  $m/z$  (rel. int.): 287 (M+1, 100). Anal. calcd. for  $C_{16}H_{18}N_2O_3$  (286.33): C, 67.12; H, 6.34; N, 9.78. Found: C, 67.20; H, 6.41; N, 9.86 %.  $^1H$  NMR (600.1 MHz,  $CDCl_3$ , 323 K):  $\delta$  = 7.35-7.29 (m, 4H, H-7, H-8), 7.28-7.23 (m, 1H, H-9), 4.91 (d, 1H,  $H_{a-5}$ ,  $J$  = 14.5 Hz), 4.72 (d, 1H,  $H_{b-5}$ ,  $J$  = 14.6 Hz), 4.15-3.98 (m, 2H, H-2',  $H_{a-1'}$ ), 3.78-3.72 (m, 1H,  $H_{a-3'}$ ), 3.64 (t, 1H,  $H_{b-3'}$ ,  $J$  = 10.1 Hz), 3.54 (dd, 1H,  $H_{b-1'}$ ,  $J$  = 11.5 Hz,  $J$  = 2.7 Hz), 2.02 (m, 1H,  $H_{a-4'}$ ), 1.97-1.89 (m, 2H,  $H_{a-5'}$ ,  $H_{b-4'}$ ), 1.66-1.58 (m, 1H,  $H_{b-5'}$ ).  $^{13}C$  NMR (150.9 MHz, DMSO- $d_6$ , 293 K):  $\delta$  = 188.67\* (1C, C-1), 182.56\* (1C, C-2), 167.77\* (1C, C-3), 166.76\* (1C, C-4), 139.94 (1C, C-6), 128.90 (2C, C-8), 127.85 (1C, C-9), 127.58 (2C, C-7), 63.91 (1C, C-1'), 61.10 (1C, C-2'), 49.18 (1C, C-3'), 46.94 (1C, C-5), 27.08 (1C, C-4'), 23.54 (1C, C-5').

**3,4-bis(((R)-1-hydroxybutan-2-yl)amino)cyclobut-3-ene-1,2-dione (8b)**

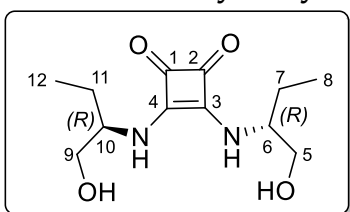

Following the general procedure, the crude product was obtained and then purified by simple filtration and washing with PE/MTBE = 10:1 to give 0.53 g (88%) **8b** as colorless crystals.

Analytical and spectral data:

m.p. 275-276 °C (with decomp.).  $[\alpha]_D^{20} = +83.0$  (c 1.00, DMSO). MS (CI)  $m/z$  (rel. int.): 257 (M+1, 100). Anal. calcd. for  $C_{12}H_{20}N_2O_4$  (256.30): C, 56.24; H, 7.87; N, 10.93. Found: 56.32; H, 7.81; N, 10.96 %.  $^1H$  NMR (600.1 MHz, DMSO- $d_6$ , 293 K):  $\delta$  = 7.40 (br d, 2H,  $NH$ ,  $J$  = 7.1 Hz), 4.95 (m, 2H,  $OH$ ), 3.85 (m, 2H, H-6, H-10), 3.58-3.32 (m, overlapped with water peak, 4H, H-5, H-9), 1.68-1.52 (m, 2H,  $H_{a-7}$ ,  $H_{a-11}$ ), 1.51-1.34 (m, 2H,  $H_{b-7}$ ,  $H_{b-11}$ ), 0.88 (t, 6H, H-8, H-12,  $J$  = 7.4 Hz).  $^{13}C$  NMR (150.9 MHz, DMSO- $d_6$ , 293 K):  $\delta$  = 182.12 (2C, C-1, C-2), 167.87 (2C, C-3, C-4), 63.29 (2C, C-5, C-9), 56.88 (2C, C-6, C-10), 25.04 (2C, C-7, C-11), 10.32 (2C, C-8, C-12).

**3-(((1R,2R,4S)-2-hydroxy-1,3,3-trimethylbicyclo[2.2.1]heptan-2-yl)methyl)amino)-4-(((R)-1-hydroxybutan-2-yl)amino)cyclobut-3-ene-1,2-dione (8e)**

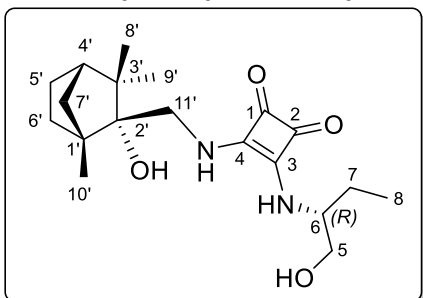

Following the general procedure, the crude product was obtained and then purified by column chromatography (30 g silica gel, eluent: a) DCM/acetone = 5:1, b) DCM/acetone = 1:1) to give 0.10 g (83%) **8e** as colorless crystals.

Analytical and spectral data:

m.p. 225-227 °C.  $[\alpha]_D^{20} = +34.7$  (c 1.00, DMSO). MS (CI)  $m/z$  (rel. int.): 351 (M+1, 100), 333 (M-OH, 51), 198 (M-fenchol, 17). Anal. calcd. for  $C_{19}H_{30}N_2O_4$  (350.46): C, 65.12; H, 8.63; N, 7.99. Found: C, 65.22; H, 8.51; N, 8.10 %.  $^1H$  NMR (600.1 MHz, DMSO- $d_6$ , 293 K):  $\delta$  = 7.79 (d, 1H, CHNH,  $J$  = 9.0 Hz), 7.41-7.29 (m, 1H, CH<sub>2</sub>NH), 4.91 (t, 1H, CH<sub>2</sub>OH,  $J$  = 5.2 Hz), 4.26 (s, 1H, OH), 3.92-3.83 (m, 2H, H<sub>a</sub>-11', H-6), 3.49 (dd, 1H, H<sub>b</sub>-11',  $J$  = 13.3 Hz,  $J$  = 3.6 Hz), 3.45 (t, 2H, H-5,  $J$  = 5.0 Hz), 2.06-1.97 (m, 1H, H<sub>endo</sub>-6'), 1.67-1.56 (m, 3H, H<sub>endo</sub>-5', H<sub>a</sub>-7, H<sub>syn</sub>-7'), 1.54 (br d, 1H, H-4',  $J$  = 4.0 Hz), 1.47-1.40 (m, 1H, H<sub>b</sub>-7), 1.36 (tt, 1H, H<sub>exo</sub>-5',  $J$  = 12.3 Hz,  $J$  = 4.7 Hz), 1.09 (dd, 1H, H<sub>anti</sub>-7',  $J$  = 10.1 Hz,  $J$  = 1.1 Hz), 0.98 (s, 3H, H-8'), 0.97 (s, 3H, H-10'), 0.92 (s, 3H, H-9'), 0.91-0.87 (overlapped m, 1H, H<sub>exo</sub>-6'), 0.85 (overlapped t, 3H, H-8,  $J$  = 7.4 Hz).  $^{13}C$  NMR (150.9 MHz, DMSO- $d_6$ , 293 K):  $\delta$  = 182.74\* (1C, C-1), 181.94\* (1C, C-2), 168.12\* (1C, C-3), 167.46\* (1C, C-4), 78.87 (1C, C-2'), 63.32 (1C, C-5), 56.61 (1C, C-6), 51.59 (1C, C-1'), 49.29 (1C, C-4'), 48.67 (1C, C-11'), 43.74 (1C, C-3'), 41.05 (1C, C-7'), 30.12 (1C, C-6'), 26.31 (1C, C-8'), 24.98 (1C, C-7), 24.91 (1C, C-5'), 22.68 (1C, C-9'), 17.56 (1C, C-10'), 10.17 (1C, C-8).

**3-((2-((1R,2R,4S)-2-hydroxy-1,3,3-trimethylbicyclo[2.2.1]heptan-2-yl)ethyl)amino)-4-(((R)-1-hydroxybutan-2-yl)amino)cyclobut-3-ene-1,2-dione (8f)**

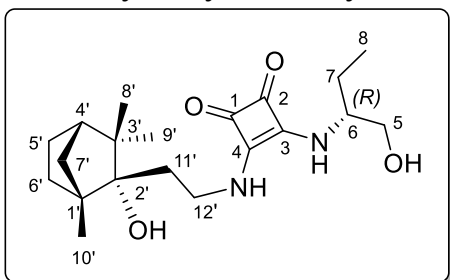

Following the general procedure the crude product was obtained and then purified by simple filtration and washing with PE to give 0.18 g (99%) **8f** as colorless crystals.

Analytical and spectral data:

m.p. 199-200 °C.  $[\alpha]_D^{20} = +7.6$  (c 0.81, DMSO). MS (CI)  $m/z$  (rel. int.): 365 (M+1, 100), 347 (M-OH, 73), 197 (81). Anal. calcd. for  $C_{20}H_{32}N_2O_4$  (364.49): C, 65.91; H, 8.85; N, 7.69. Found: C, 65.83; H, 8.93; N, 7.76 %.  $^1H$  NMR (600.1 MHz, DMSO- $d_6$ , 293 K): 7.42-7.23 (m, 2H, NH), 4.92 (m, 1H, OH), 3.95 (s, 1H, OH), 3.86 (br s, 1H, H-6), 3.66 (br s, 2H, H-12), 3.50-3.42 (m, 2H, H-5), 2.04-1.96 (m, 1H, H<sub>endo</sub>-6'), 1.81-1.74 (m, 1H, H<sub>a</sub>-11'), 1.74-1.67 (m, 1H, H<sub>b</sub>-11'), 1.64-1.54 (m, 3H, H<sub>a</sub>-7, H<sub>endo</sub>-5', H<sub>syn</sub>-7'), 1.52 (br d, 1H, H-4',  $J$  = 4.1 Hz), 1.44 (dt, 1H, H<sub>b</sub>-7,  $J$  = 14.8 Hz,  $J$  = 7.6 Hz), 1.33 (overlapped tt, 1H, H<sub>exo</sub>-5',  $J$  = 12.5 Hz,  $J$  = 4.6 Hz), 1.02 (dd, 1H, H<sub>anti</sub>-7',  $J$  = 10.1 Hz,  $J$  = 1.5 Hz), 1.01 (s, 3H, H-8'), 0.98 (s, 3H, H-10'), 0.88 (s, 3H, H-9'), 0.89-0.83 (overlapped m, 1H, H<sub>exo</sub>-6'), 0.87 (overlapped t, 3H, H-8,  $J$  = 7.5 Hz).  $^{13}C$  NMR (150.9 MHz, DMSO- $d_6$ , 293 K):  $\delta$  = 182.72\* (1C, C-1), 182.18\* (1C, C-2), 168.34\* (1C, C-3), 167.86\* (1C, C-4), 79.69 (1C, C-2'), 63.73 (1C, C-5), 57.27 (1C, C-6), 52.92 (1C, C-1'), 49.99 (1C, C-4'), 44.53 (1C, C-3'), 41.32 (2C, C-12, C-7'), 38.00 (1C, C-11'), 30.66 (1C, C-6'), 28.13 (1C, C-8'), 25.31 (2C, C-7, C-5'), 23.12 (1C, C-9'), 18.65 (1C, C-10'), 10.74 (1C, C-8).



**3-(((R)-1-hydroxybutan-2-yl)amino)-4-(((S)-1-hydroxybutan-2-yl)amino)cyclobut-3-ene-1,2-dione (9b)**

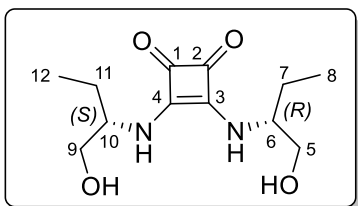

Following the general procedure, the crude product was obtained and then purified by simple filtration and washing with PE/MTBE = 10:1 to give 0.60 g (99%) **9b** as colorless crystals.

Analytical and spectral data:

m.p. 197-198 °C.  $[\alpha]_D^{20} = 0$  (c 1.03, DMSO). MS (CI)  $m/z$  (rel. int.): 257 (M+1, 100). Anal. calcd. for  $C_{12}H_{20}N_2O_4$  (256.30): C, 56.24; H, 7.87; N, 10.93. Found: C, 56.20; H, 7.94; N, 10.91 %.  $^1H$  NMR (600.1 MHz, DMSO- $d_6$ , 293 K):  $\delta$  = 7.42 (br d, 2H, NH,  $J$  = 7.7 Hz), 4.97 (m, 2H, OH), 3.85 (m, 2H, H-6, H-10), 3.56-3.32 (m, overlapped with water peak, 4H, H-5, H-9), 1.68-1.52 (m, 2H, H<sub>a</sub>-7, H<sub>a</sub>-11), 1.51-1.33 (m, 2H, H<sub>b</sub>-7, H<sub>b</sub>-11), 0.86 (t, 6H, H-8, H-12,  $J$  = 7.4 Hz).  $^{13}C$  NMR (150.9 MHz, DMSO- $d_6$ , 293 K):  $\delta$  = 182.11 (2C, C-1, C-2), 167.85 (2C, C-3, C-4), 63.35 (2C, C-5, C-9), 56.85 (2C, C-6, C-10), 25.00 (2C, C-7, C-11), 10.32 (2C, C-8, C-12).

**3,4-bis(((S)-1-hydroxybutan-2-yl)amino)cyclobut-3-ene-1,2-dione (9c)**

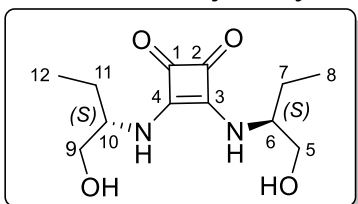

Following the general procedure, the crude product was obtained and then purified by simple filtration and washing with PE/MTBE = 10:1 to give 0.57 g (95%) **9c** as colorless crystals.

Analytical and spectral data:

m.p. 275-276 °C (with decomp.).  $[\alpha]_D^{20} = -80.0$  (c 1.00, DMSO). MS (CI)  $m/z$  (rel. int.): 257 (M+1, 100). Anal. calcd. for  $C_{12}H_{20}N_2O_4$  (256.30): C, 56.24; H, 7.87; N, 10.93. Found: C, 56.27; H, 7.93; N, 10.98 %.  $^1H$  NMR (600.1 MHz, DMSO- $d_6$ , 293 K):  $\delta$  = 7.40 (br d, 2H, NH,  $J$  = 7.7 Hz), 4.95 (m, 2H, OH), 3.85 (m, 2H, H-6, H-10), 3.49-3.40 (m, overlapped with water peak, 4H, H-5, H-9), 1.66-1.52 (m, 2H, H<sub>a</sub>-7, H<sub>a</sub>-11), 1.49-1.37 (m, 2H, H<sub>b</sub>-7, H<sub>b</sub>-11), 0.87 (t, 6H, H-8, H-12,  $J$  = 7.4 Hz).  $^{13}C$  NMR (150.9 MHz, DMSO- $d_6$ , 293 K):  $\delta$  = 182.12 (2C, C-1, C-2), 167.87 (2C, C-3, C-4), 63.29 (2C, C-5, C-9), 56.88 (2C, C-6, C-10), 25.04 (2C, C-7, C-11), 10.32 (2C, C-8, C-12).

**3-(((1*R*,2*R*,4*S*)-2-hydroxy-1,3,3-trimethylbicyclo[2.2.1]heptan-2-yl)methyl)amino)-4-(((*S*)-1-hydroxybutan-2-yl)amino)cyclobut-3-ene-1,2-dione (**9e**)**

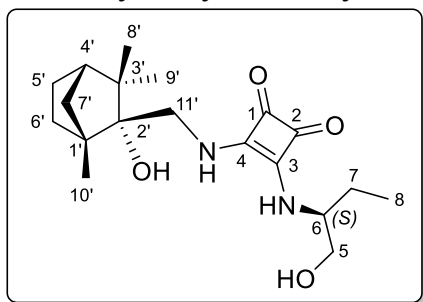

Following the general procedure, the crude product was obtained and then purified by column chromatography (30 g silica gel, eluent: DCM/acetone = 1:1) to give 0.096 g (91%) **9e** as colorless crystals.

Analytical and spectral data:

m.p. 235-236 °C.  $[\alpha]_D^{20} = -14.7$  (c 0.72, DMSO). MS (CI)  $m/z$  (rel. int.): 351 (M+1, 100), 333 (M-OH, 55), 198 (M-fenchol, 18). Anal. calcd. for  $C_{19}H_{30}N_2O_4$  (350.46): C, 65.12; H, 8.63; N, 7.99. Found: C, 65.17; H, 8.58; N, 7.98 %.  $^1H$  NMR (600.1 MHz, DMSO- $d_6$ , 293 K):  $\delta$  = 7.78 (d, 1H, CHNH,  $J$  = 8.9 Hz), 7.38-7.31 (m, 1H, NH), 4.92 (t, 1H, CH<sub>2</sub>OH,  $J$  = 5.1 Hz), 4.25 (s, 1H, OH), 3.92-3.84 (m, 2H, H<sub>a</sub>-11', H-6), 3.49 (dd, 1H, H<sub>b</sub>-11',  $J$  = 13.4 Hz,  $J$  = 3.5 Hz), 3.45 (t, 2H, H-5,  $J$  = 4.9 Hz), 2.05-1.98 (m, 1H, H<sub>endo</sub>-6'), 1.66-1.56 (m, 3H, H<sub>endo</sub>-5', H<sub>a</sub>-7, H<sub>syn</sub>-7'), 1.55 (br d, 1H, H-4',  $J$  = 3.8 Hz), 1.43 (dt, 1H, H<sub>b</sub>-7,  $J$  = 14.2 Hz,  $J$  = 7.6 Hz), 1.36 (tt, 1H, H<sub>exo</sub>-5',  $J$  = 12.4 Hz,  $J$  = 4.7 Hz), 1.09 (d, 1H, H<sub>anti</sub>-7',  $J$  = 9.8 Hz), 0.98 (s, 6H, H-8', H-10'), 0.92 (s, 3H, H-9'), 0.91-0.87 (overlapped m, 1H, H<sub>exo</sub>-6'), 0.85 (overlapped t, 3H, H-8,  $J$  = 7.4 Hz).  $^{13}C$  NMR (150.9 MHz, DMSO- $d_6$ , 293 K):  $\delta$  = 182.74\* (1C, C-1), 181.96\* (1C, C-2), 168.09\* (1C, C-3), 167.46\* (1C, C-4), 78.83 (1C, C-2'), 63.30 (1C, C-5), 56.60 (1C, C-6), 51.59 (1C, C-1'), 49.25 (1C, C-4'), 48.61 (1C, C-11'), 43.71 (1C, C-3'), 41.03 (1C, C-7'), 30.13 (1C, C-6'), 26.32 (1C, C-8'), 25.00 (1C, C-7), 24.92 (1C, C-5'), 22.73 (1C, C-9'), 17.52 (1C, C-10'), 10.17 (1C, C-8).

**3-(((*S*)-3,3-dimethylbutan-2-yl)amino)-4-((1-hydroxy-2-methylpropan-2-yl)amino)cyclobut-3-ene-1,2-dione (**10**)**

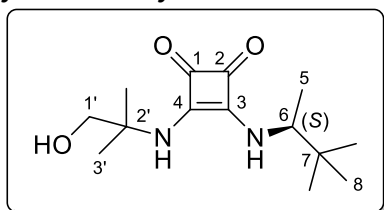

Following the general procedure, the crude product was obtained and then purified by column chromatography (30 g silica gel, eluent: a) DCM/acetone = 5:1, b) DCM/acetone = 3:1) to give 0.12 g (81%) **10** as colorless crystals.

Analytical and spectral data:

m.p. 276-278 °C.  $[\alpha]_D^{20} = -1.3$  (c 0.96, DMSO). MS (CI)  $m/z$  (rel. int.): 269 (M+1, 100), 197 (M-*i*-BuOH, 15). Anal. calcd. for  $C_{14}H_{24}N_2O_3$  (268.36): C, 62.66; H, 9.01; N, 10.44. Found: C, 62.59; H, 8.95; N, 10.40 %.  $^1H$  NMR (600.1 MHz, DMSO- $d_6$ , 293 K):  $\delta$  = 7.49 (s, 1H, NHCH(CH<sub>3</sub>)<sub>2</sub>), 7.48 (s, 1H, NHCH), 5.15 (t, 1H, OH,  $J$  = 5.6 Hz), 3.91 (qd, 1H, H-6,  $J$  = 9.9 Hz,

$J = 6.8$  Hz), 3.42 (d, 2H, H-1',  $J = 5.4$  Hz), 1.28 (d, 6H, H-3',  $J = 1.4$  Hz), 1.10 (d, 3H, H-5,  $J = 6.8$  Hz), 0.86 (s, 9H, H-8).  $^{13}\text{C}$  NMR (150.9 MHz, DMSO- $d_6$ , 293 K):  $\delta = 182.21^*$  (1C, C-1), 180.92\* (1C, C-2), 168.55\* (1C, C-3), 167.71\* (1C, C-4), 68.96 (1C, C-1'), 58.10 (1C, C-6), 56.21 (1C, C-2'), 34.81 (1C, C-7), 25.91 (3C, C-8), 25.48 (2C, C-3'), 16.97 (1C, C-5).

## Preparation of 12a and 12b

### General procedure:

A solution of 3,4-diethoxycyclobut-3-ene-1,2-dione **1** (1.0 equiv) and  $\text{Et}_3\text{N}$  (1.1 equiv) in 15 ml EtOH was cooled to 0 °C. Then the requisite amine (1.1 equiv) was added and the resulting mixture was stirred at room temperature for 24 h. The solvent was removed under reduced pressure and the crude product was purified by column chromatography.

### (S)-3-ethoxy-4-((1-phenylethyl)amino)cyclobut-3-ene-1,2-dione (12a)

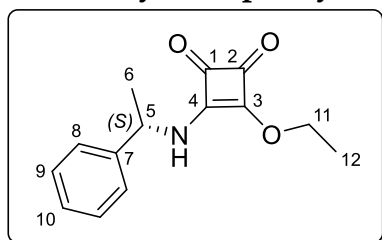

Following the general procedure, 3,4-diethoxycyclobut-3-ene-1,2-dione **1** (1.08 mmol, 0.16 ml),  $\text{Et}_3\text{N}$  (1.19 mmol, 0.17 ml) and (S)-1-phenylethylamine **11a** (1.19 mmol, 0.15 ml) were stirred for 24 h. The crude product was purified by column chromatography (60 g silica gel, eluent: DCM/MTBE = 20:1) to give 0.26 g (99%) **12a** as pale yellow oil.

### Analytical and spectral data:

$[\alpha]_D^{20} = -53.1$  ( $c$  1.11,  $\text{CHCl}_3$ ). MS (ESI)  $m/z$  (rel. int.): 246 (100,  $M+1$ ), 142 ( $M-\text{CH}(\text{CH}_3)\text{Ph}$ ), 114 (92,  $M-\text{CH}_2\text{CH}_3$ ,  $\text{CH}(\text{CH}_3)\text{Ph}$ ). Anal. calcd. for  $\text{C}_{14}\text{H}_{15}\text{NO}_3$  (245.28): C, 68.56; H, 6.16; N, 5.71. Found: C, 68.60; H, 6.24; N, 5.75 %.  $^1\text{H}$  NMR (600.1 MHz,  $\text{CDCl}_3$ , 298 K):  $\delta = 7.39$ -7.34 (m, 2H, H-9), 7.34-7.27 (m, 3H, H-8, H-10), 6.71 (br s, 1H,  $\text{NH}$ ), 4.94-4.83 (m, 1H, H-5), 4.73 (q, 2H, H-11,  $J = 7.1$  Hz), 1.64 (d, 3H, H-6,  $J = 6.9$  Hz), 1.43-1.37 (m, 1H, H-12).  $^{13}\text{C}$  NMR (150.9 MHz,  $\text{CDCl}_3$ , 298 K):  $\delta = 183.20^*$  (1C, C-1), 177.67\* (1C, C-2), 177.39\* (1C, C-3), 171.57\* (1C, C-4), 142.21 (1C, C-7), 128.96 (2C, C-9), 128.07 (1C, C-10), 125.93 (2C, C-8), 69.65 (1C, C-11), 54.70 (1C, C-5), 22.90 (1C, C-6), 15.71 (1C, C-12).

### 3-ethoxy-4-(((1R,2R,4R)-1,7,7-trimethylbicyclo[2.2.1]heptan-2-yl)amino)cyclobut-3-ene-1,2-dione (12b)

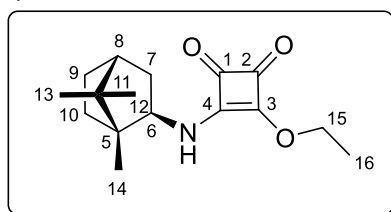

Following the general procedure, 3,4-diethoxycyclobut-3-ene-1,2-dione **1** (1.08 mmol, 0.16 ml),  $\text{Et}_3\text{N}$  (1.19 mmol, 0.17 ml) and bornylamine **11b** (*exo:endo* = 88:12) (1.08 mmol, 0.17 g)

were stirred for 24 h. The crude product was purified by column chromatography (60 g silica gel, eluent: DCM/CH/*i*-PrOH = 5:1:0.025) to give 0.20 g (66%) **12b** as colorless crystals.

Analytical and spectral data:

m.p. 134-135 °C.  $[\alpha]_D^{20} = +58.5$  (*c* 0.83, CHCl<sub>3</sub>). MS (CI) *m/z* (rel. int.): 278 (M+1, 100), 142 (M-bornane, 33), 137 (bornane-1, 16). Anal. calcd. for C<sub>16</sub>H<sub>23</sub>NO<sub>3</sub> (277.36): C, 69.29; H, 8.36; N, 5.05. Found: C, 69.16; H, 8.26; N, 5.10 %. <sup>1</sup>H NMR (600.1 MHz, CDCl<sub>3</sub>, 298 K): δ = 5.65 (br d, 1H, NH, *J* = 8.6 Hz), 4.84-4.68 (m, 2H, H-15), 3.60 (td, 1H, H-6), 1.93-1.87 (m, 1H, H<sub>exo</sub>-7), 1.83-1.79 (m, 1H, H-8), 1.79-1.68 (m, 2H, H<sub>endo</sub>-7, H<sub>exo</sub>-9), 1.65-1.59 (m, 1H, H<sub>exo</sub>-10), 1.50-1.46 (t, 3H, H-16, *J* = 7.1 Hz), 1.19-1.10 (m, 2H, H<sub>endo</sub>-9, H<sub>endo</sub>-10), 0.92 (s, 3H, H-13), 0.86 (s, 6H, H-12, H-14). <sup>13</sup>C NMR (150.9 MHz, CDCl<sub>3</sub>, 298 K): δ = 188.99\* (1C, C-1), 183.04\* (1C, C-2), 176.74\* (1C, C-3), 172.02\* (1C, C-4), 69.57 (1C, C-15), 63.20 (1C, C-6), 49.80 (1C, C-11), 47.02 (1C, C-5), 44.70 (1C, C-8), 39.00 (1C, C-7), 35.49 (1C, C-10), 26.81 (1C, C-9), 20.25 (1C, C-13), 15.88 (1C, C-16), 11.61 (1C, C-14, C-12).

**Preparation of 13a and 13b**

A solution of **12a** or **12b** (1 equiv.) in 2 ml THF was treated with 10 ml 10% aqueous HCl. The resulting mixture was stirred at room temperature for 24 h. The residue was filtered, washed with water and evaporated *in vacuo*.

**(S)-3-hydroxy-4-((1-phenylethyl)amino)cyclobut-3-ene-1,2-dione (13a)**

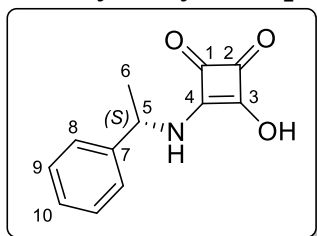

Following the general procedure, 0.20 g (85%) **13a** were obtained as colorless powder.

Analytical and spectral data:

m.p. 202-203 °C.  $[\alpha]_D^{20} = -200.6$  (*c* 0.99, acetone). MS (CI) *m/z* (rel. int.): 217 (M+1, 100), 142 (M-phenyl, 36), 114 (M-ethylbenzene, 98), 105 (ethylbenzene-1, 92). Anal. calcd. for C<sub>12</sub>H<sub>11</sub>NO<sub>3</sub> (217.22): C, 66.35; H, 5.10; N, 6.45. Found: C, 66.27; H, 5.20; N, 6.40 %. <sup>1</sup>H NMR (600.1 MHz, DMSO-d<sub>6</sub>, 338 K): δ = 10.25 (br s, 1H, OH), 8.65 (br d, 1H, NH, *J* = 7.0 Hz), 7.39-7.32 (m, 4H, H-8, H-9), 7.29-7.24 (m, 1H, H-10), 5.14-5.06 (m, 1H, H-5), 1.53 (d, 3H, H-6, *J* = 6.9 Hz). <sup>13</sup>C NMR (150.9 MHz, DMSO-d<sub>6</sub>, 338 K): δ = 185.03\* (1C, C-1), 184.29\* (1C, C-2), 173.38\* (1C, C-3 or C-4), 143.93 (1C, C-7), 128.63 (2C, C-9), 127.30 (1C, C-10), 126.09 (2C, C-8), 53.42 (1C, C-5), 22.62 (1C, C-6).

**3-hydroxy-4-(((1R,2R,4R)-1,7,7-trimethylbicyclo[2.2.1]heptan-2-yl)amino)cyclobut-3-ene-1,2-dione (13b)**

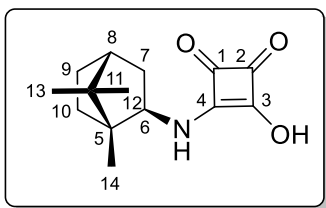

Following the general procedure, 0.16 g (90%) **13a** were obtained as colorless powder.

Analytical and spectral data:

m.p. 220 °C (with decomp.).  $[\alpha]_D^{20} = +15.9$  (*c* 1.00, DMSO). MS (CI) *m/z* (rel. int.): 250 (*M*+1, 58), 137 (bornane-1, 100), 114 (*M*-bornane, 42), 81 (*M*-bornylamine, 38). Anal. calcd. for  $C_{14}H_{19}NO_3$  (249.31): C, 67.45; H, 7.68; N, 5.62. Found: C, 67.34; H, 7.57; N, 5.54 %.  $^1H$  NMR (600.1 MHz, DMSO- $d_6$ , 293 K):  $\delta$  = 7.94 (br d, 1H,  $NH$ , *J* = 7.7 Hz), 3.81-3.70 (m, 1H, H-6), 1.88-1.80 (m, 1H, *H*<sub>exo</sub>-7), 1.79-1.71 (m, 1H, *H*<sub>endo</sub>-7), 1.71-1.68 (m, 1H, H-8), 1.68-1.61 (m, 1H, *H*<sub>exo</sub>-9), 1.53-1.46 (m, 1H, *H*<sub>exo</sub>-10), 1.13-1.05 (m, 2H, *H*<sub>endo</sub>-9, *H*<sub>endo</sub>-10), 0.91 (s, 3H, H-13), 0.79 (s, 3H, H-12), 0.77 (s, 3H, H-14).  $^{13}C$  NMR (150.9 MHz, DMSO- $d_6$ , 293 K):  $\delta$  = 185.14\* (1C, C-1 or C-2), 174.54\* (1C, C-3 or C-4), 62.22 (1C, C-6), 50.30 (1C, C-11), 46.92 (1C, C-5), 44.65 (1C, C-8), 37.18 (1C, C-7), 35.50 (1C, C-10), 27.08 (1C, C-9), 20.99 (1C, C-12), 20.29 (1C, C-13), 11.68 (1C, C-14).

**Preparation of aminoalcohol 17**

A solution of amino acid **14** (1.94 mmol, 0.20 g) in 5 ml  $H_2O$  was treated with  $K_2CO_3$  (5.82 mmol, 0.81 g) and  $BnBr$  (5.82 mmol, 0.69 ml). The reaction mixture was heated at reflux for 3 h then allowed to cool to room temperature and extracted with  $Et_2O$ . The combined organic extracts were washed with brine, then dried and concentrated *in vacuo*. The crude product was purified by column chromatography (36 g silica gel; eluent: PE/MTBE = 100:1) to give 0.62 g (86%) of **15** as pale yellow oil. The obtained product (1.31 mmol, 0.49 g) was dissolved under inert atmosphere in 4 ml dry THF and then treated with  $PhMgCl$  (2M solution in THF) (5.26 mmol, 2.63 ml) at 0 °C. The resulting mixture was stirred for 5 min at 0 °C and 4 h at room temperature until **15** was consumed (TLC: PE/MTBE = 25:1). After quenching with aqueous  $NH_4Cl$ , the mixture was filtered through Celite® and extracted twice with ether. The combined organic extracts were dried with  $MgSO_4$  and concentrated *in vacuo*. The crude product was purified by column chromatography (28 g silica gel; eluent: PE/MTBE = 30:1) to give 0.48 g (86%) of **16** as colorless crystals. Then **16** (0.83 mmol, 0.35 g) was dissolved in 10 ml MeOH with 4.4%  $HCOOH$  and the solution was degassed with argon.  $Pd/C$  (0.33 mmol, 0.35 g) was added and the reaction was monitored by TLC (MTBE) – reaction time 2h. The residue was filtered through Celite®, washed with DCM and concentrated *in vacuo*. The crude product was purified by column chromatography (14 g silica gel, eluent: PE/MTBE = 1:2) to give 0.17g (86%) **17** as off-white crystals.

**(S)-2-(dibenzylamino)butanoate (15)**

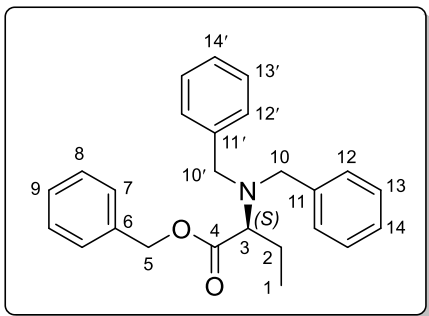

Analytical and spectral data:

$[\alpha]_{\text{D}}^{20} = +11.7$  (*c* 1.37,  $\text{CHCl}_3$ ). MS (ESI)  $m/z$  (rel. int.): 374 (100,  $\text{M}+1$ ), 282 (39,  $\text{M}-\text{Ph}$ ). Anal. calcd. for  $\text{C}_{30}\text{H}_{31}\text{NO}$  (373.50): C, 80.40; H, 7.29; N, 3.75. Found: C, 80.35; H, 7.30; N, 3.82 %.  $^1\text{H}$  NMR (600.1 MHz,  $\text{CDCl}_3$ , 300 K):  $\delta$  = 7.43-7.37 (m, 4H, H-7, H-8), 7.37-7.33 (m, 1H, H-9), 7.33-7.30\* (m, 4H, H-12, H-13), 7.30-7.26\* (m, 4H, H-12', H-13'), 7.24-7.19 (m, 2H, H-14, H-14'), 5.25 (d, 1H,  $\text{H}_{\text{a}}-5$ ,  $J = 12.3$  Hz), 5.15 (d, 1H,  $\text{H}_{\text{b}}-5$ ,  $J = 12.3$  Hz), 3.91 (d, 2H, H-10,  $J = 14.0$  Hz), 3.51\* (d, 2H, H-10,  $J = 14.0$  Hz), 3.27 (t, 1H, H-3,  $J = 7.6$  Hz), 1.83-1.71 (m, 2H, H-2), 0.90 (t, 3H, H-1,  $J = 7.4$  Hz).  $^{13}\text{C}$  NMR (150.9 MHz,  $\text{CDCl}_3$ , 300 K):  $\delta$  = 172.91 (1C, C-4), 139.72 (2C, C-11), 136.19 (1C, C-6), 128.79\* (4C, C-12, C-13), 128.59\* (2C, C-7), 128.44\* (2C, C-8), 128.29 (1C, C-9), 128.20\* (4C, C-12, C-13, C-12', C-13'), 126.91 (2C, C-14, C-14'), 65.86 (1C, C-5), 62.59 (1C, C-3), 54.46 (2C, C-10), 22.70 (1C, C-2), 11.00 (1C, C-1).

**(S)-2-(dibenzylamino)-1,1-diphenylbutan-1-ol (16)**

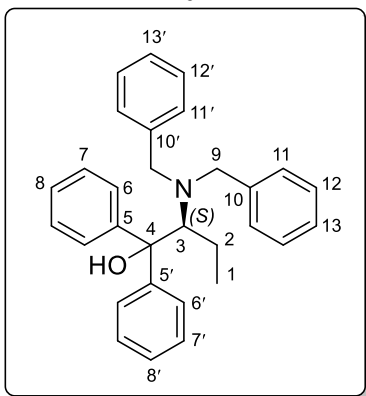

Analytical and spectral data:

m.p. 110-112 °C.  $[\alpha]_{\text{D}}^{20} = -57.2$  (*c* 1.03,  $\text{CHCl}_3$ ). MS (CI)  $m/z$  (rel. int.): 238 ( $\text{M}+1$ , 100). Anal. calcd. for  $\text{C}_{30}\text{H}_{31}\text{NO}$  (421.58): C, 85.47; H, 7.41; N, 3.32. Found: C, 85.42; H, 7.50; N, 3.40 %.  $^1\text{H}$  NMR (600.1 MHz,  $\text{CDCl}_3$ , 293 K):  $\delta$  = 7.61-7.58\* (m, 2H, H-6), 7.34-7.30\* (m, 4H, H-11, H-12), 7.29-7.22\* (m, 8H, H-7, H-7', H-11', H-12'), 7.21-7.14 (m, 4H, H-8, H-8', H-13), 7.12-7.08\* (m, 2H, H-6'), 5.33 (br s, 1H, OH), 3.66 (br s, 1H, H-3), 3.61-3.43 (m, 4H, H-9), 1.97-1.87 (m, 1H,  $\text{H}_{\text{a}}-2$ ), 1.87-1.76 (m, 1H,  $\text{H}_{\text{b}}-2$ ), 1.06 (t, 3H, H-1,  $J = 7.4$  Hz).  $^{13}\text{C}$  NMR (150.9 MHz,  $\text{CDCl}_3$ , 293 K):  $\delta$  = 146.22 (1C, C-5), 144.08 (1C, C-5'), 139.25 (2C, C-10, C-10'), 129.46\* (4C, C-11, C-12), 128.51 (4C, C-11', C-12'), 128.01 (2C, C-13, C-13'), 127.83\* (2C, C-6), 127.51\* (2C, C-7), 127.34\* (4C, C-6', C-7'), 126.85 (2C, C-8, C-8').

### (S)-2-amino-1,1-diphenylbutan-1-ol (17)

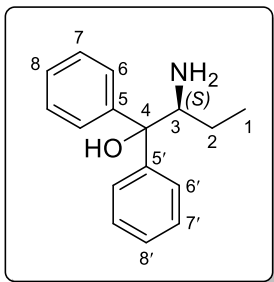

#### Analytical and spectral data:

m.p. 84-85 °C.  $[\alpha]_{\text{D}}^{20} = -73.5$  (*c* 1.10, CHCl<sub>3</sub>). MS (CI) *m/z* (rel. int.): 224 (M-OH, 60), 58 (M-benzophenone, 100). Anal. calcd. for C<sub>16</sub>H<sub>19</sub>NO (241.33): C, 79.63; H, 7.94; N, 5.80. Found: C, 79.75; H, 7.85; N, 5.71 %. <sup>1</sup>H NMR (600.1 MHz, CDCl<sub>3</sub>, 293 K):  $\delta$  = 7.62-7.58\* (m, 2H, H-6), 7.50-7.45\* (m, 2H, H-6'), 7.34-7.30\* (m, 2H, H-7), 7.29-7.25\* (m, 2H, H-7'), 7.21-7.18\* (m, 1H, H-8), 7.17-7.14\* (m, 1H, H-8'), 3.79 (dd, 1H, H-3, *J* = 10.0 Hz, *J* = 2.3 Hz), 1.42-1.34 (m, 1H, H<sub>a</sub>-2), 1.28-1.20 (m, 1H, H<sub>b</sub>-2), 0.92 (t, 3H, H-1, *J* = 7.5 Hz). <sup>13</sup>C NMR (150.9 MHz, CDCl<sub>3</sub>, 293 K):  $\delta$  = 147.03\* (1C, C-5), 144.57\* (1C, C-5'), 128.45\* (2C, C-7), 128.04\* (2C, C-7'), 126.70\* (1C, C-8), 126.38\* (1C, C-8'), 125.94\* (2C, C-6), 125.62\* (2C, C-6'), 79.00 (1C, C-4), 58.54 (1C, C-3), 23.37 (1C, C-2), 11.61 (1C, C-1).

### Preparation of squaric monoamide 18

A solution of 3,4-diethoxycyclobut-3-ene-1,2-dione **1** (0.29 mmol, 0.04 ml) and Et<sub>3</sub>N (0.32 mmol, 0.04 ml) in 5 ml EtOH was cooled to 0 °C. Then **17** (0.29 mmol, 0.07 g) was added and the resulting mixture was stirred at room temperature for 24 h. The solvent was removed under reduced pressure and the crude product was purified by flash chromatography (5 g silica gel, eluent: DCM/acetone = 50:1) to give 0.10 g (97%) **18** as colorless crystals.

### (S)-3-ethoxy-4-((1-hydroxy-1,1-diphenylbutan-2-yl)amino)cyclobut-3-ene-1,2-dione (18)

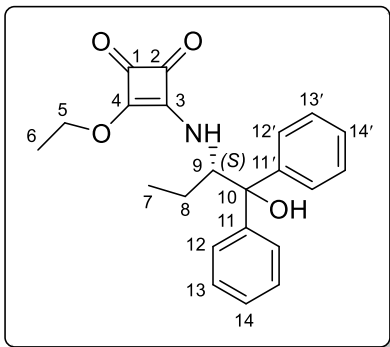

#### Analytical and spectral data:

m.p. 88-89 °C (with decomp.).  $[\alpha]_{\text{D}}^{20} = -36.9$  (*c* 0.52, CHCl<sub>3</sub>). MS (CI) *m/z* (rel. int.): 366 (M+1, 50), 348 (M-OH, 100), 183 (benzophenone+1, 72). Anal. calcd. for C<sub>22</sub>H<sub>23</sub>NO<sub>4</sub> (365.43): C, 72.31; H, 6.34; N, 3.83. Found: C, 72.40; H, 6.27; N, 3.80 %. <sup>1</sup>H NMR (600.1 MHz, CD<sub>3</sub>CN, 348 K):  $\delta$  = 7.56-7.52\* (m, 2H, H-12), 7.51-7.47\* (m, 2H, H-12'), 7.41-7.36\* (m,

2H, H-13'), 7.31-7.24\* (m, 3H, H-13, H-14), 7.20-7.15\* (m, 1H, H-14'), 6.27 (br s, 1H, NH), 5.08 (br s, 1H, OH), 4.67 (br s, 2H, H-5), 3.90 (s, 1H, H-9), 1.67-1.56 (m, 2H, H-8), 1.45 (m, 3H, H-6), 0.98 (t, 3H, H-7,  $J = 7.4$  Hz).  $^{13}\text{C}$  NMR (150.9 MHz,  $\text{CDCl}_3$ , 293 K):  $\delta = 189.96^*$  (1C, C-1), 181.56\* (1C, C-2), 177.17\* (1C, C-3), 171.93\* (1C, C-4), 144.33\* (1C, C-11), 143.72\* (1C, C-11'), 128.74\* (2C, C-13), 128.34\* (2C, C-13'), 127.46\* (1C, C-14), 127.37\* (1C, C-14'), 125.44\* (1C, C-12), 125.31\* (1C, C-12'), 81.24 (1C, C-10), 70.04 (1C, C-5), 64.04 (1C, C-9), 23.88 (1C, C-8), 16.07 (1C, C-6), 11.06 (1C, C-7).

### General procedure for the catalytic reduction of prochiral ketones

$\text{BH}_3 \cdot \text{SMe}_2$  was added to a solution of chiral ligand in dry THF (or toluene) under argon atmosphere at 0 °C. The reaction mixture was stirred for 30 min at that temperature and for another 2 h at room temperature. Finally the mixture was heated to 50 °C and stirred for additional 1 hour. The ketone was added slowly over a period of 30 min and the reaction was monitored by TLC (PE/EtOAc = 10:1). When the reaction was completed the mixture was allowed to cool to 0°C and quenched with 1N HCl. The organic layer was extracted with EtOAc and washed with brine. The combined organic extracts were dried with  $\text{MgSO}_4$  and concentrated *in vacuo*. The residue was filtered through short silica gel column (eluent: PE/EtOAc = 10:1) before being subjected to GC analysis.

### Plausible transition states involving ligand 2c

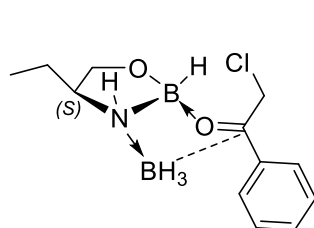

favoured  $\text{BH}_3$ -adduct with  
(S)-2-aminobutan-1-ol

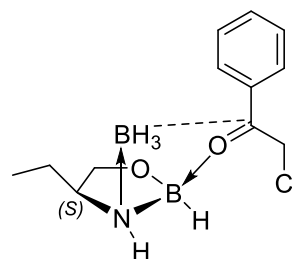

disfavoured  $\text{BH}_3$ -adduct with  
(S)-2-aminobutan-1-ol



## HRMS analysis of intermediates formation (ESI, positive mode)

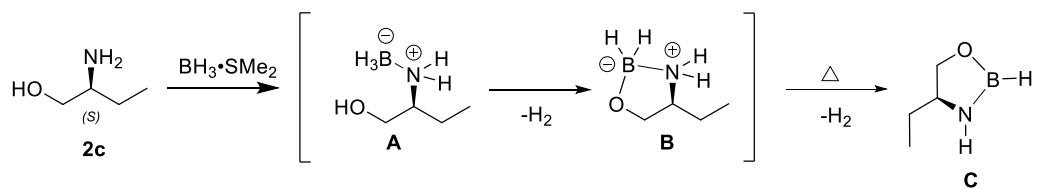

$[\text{M}+\text{H}]^+$ : [90.09134](#)  
90.094560

$[\text{M}+\text{H}]^+$ : 101.11210  
[102.10847](#)  
103.11183

$[\text{M}+\text{H}]^+$ : 99.096545  
[100.09282](#)  
101.09652

## Calculated MS spectra

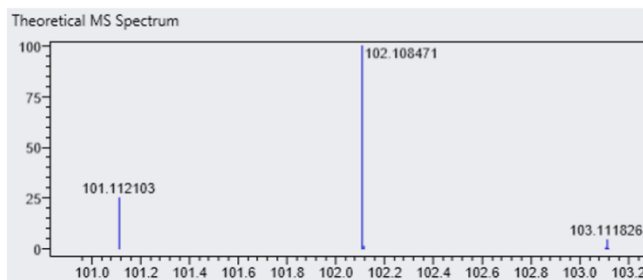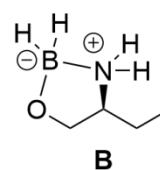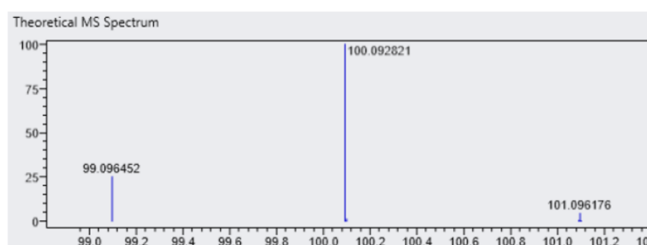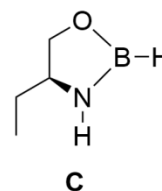

## HRMS (ESI) spectrum of 1:1-mixture 2c + $\text{BH}_3 \cdot \text{SMe}_2$ in toluene at room temperature after 0.5 h reaction time

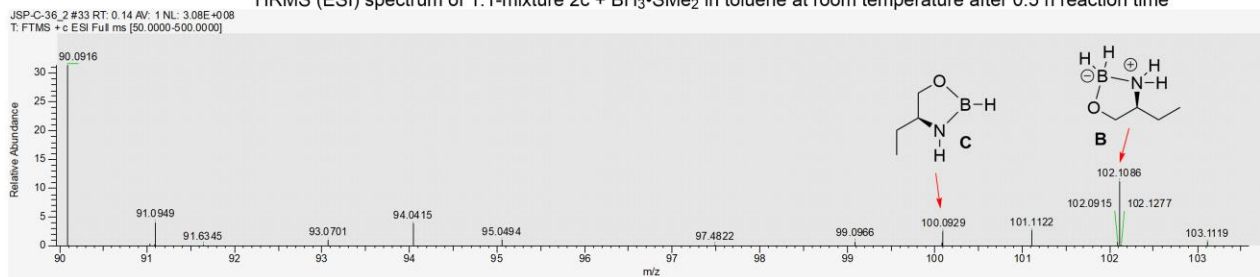

## HRMS (ESI) spectrum of 1:1-mixture 2c + $\text{BH}_3 \cdot \text{SMe}_2$ in toluene at room temperature after 48 h reaction time

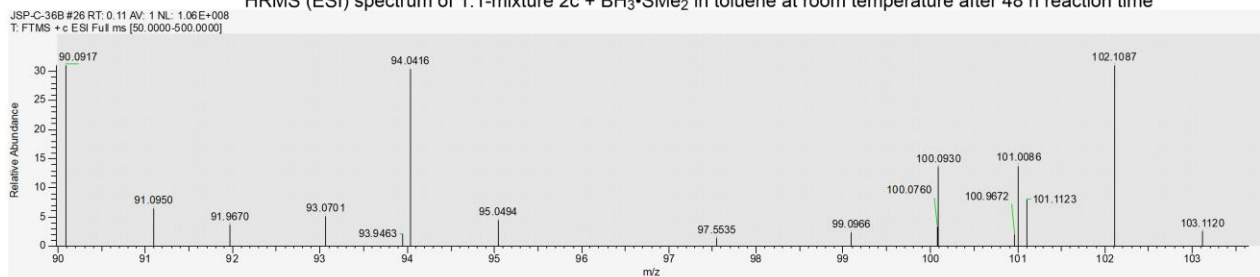

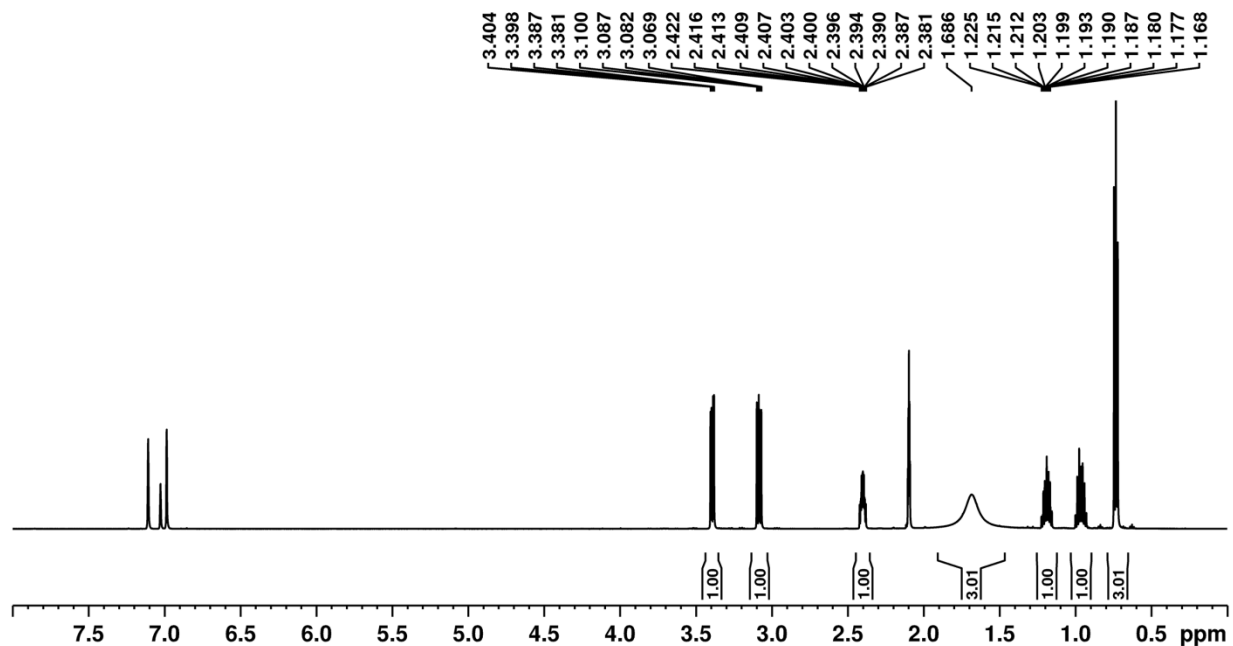

Figure S1.  $^1\text{H}$  NMR spectrum of ligand **2c** in toluene- $\text{d}_8$ .

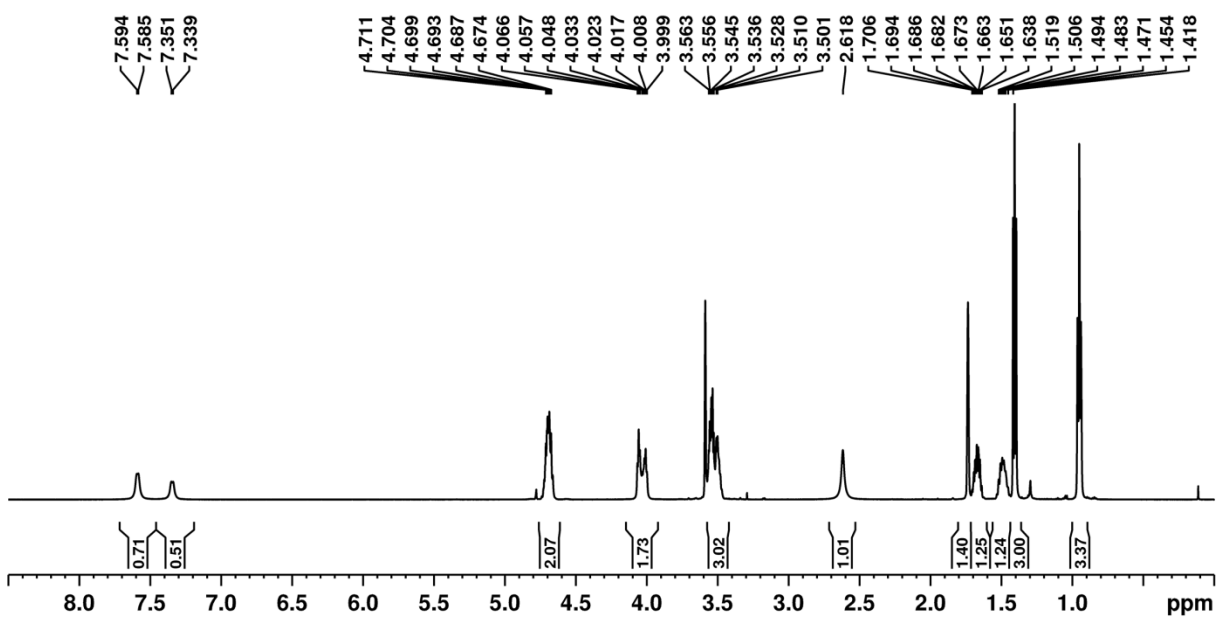

Figure S2.  $^1\text{H}$  NMR spectrum of ligand **5** in THF- $\text{d}_8$ .

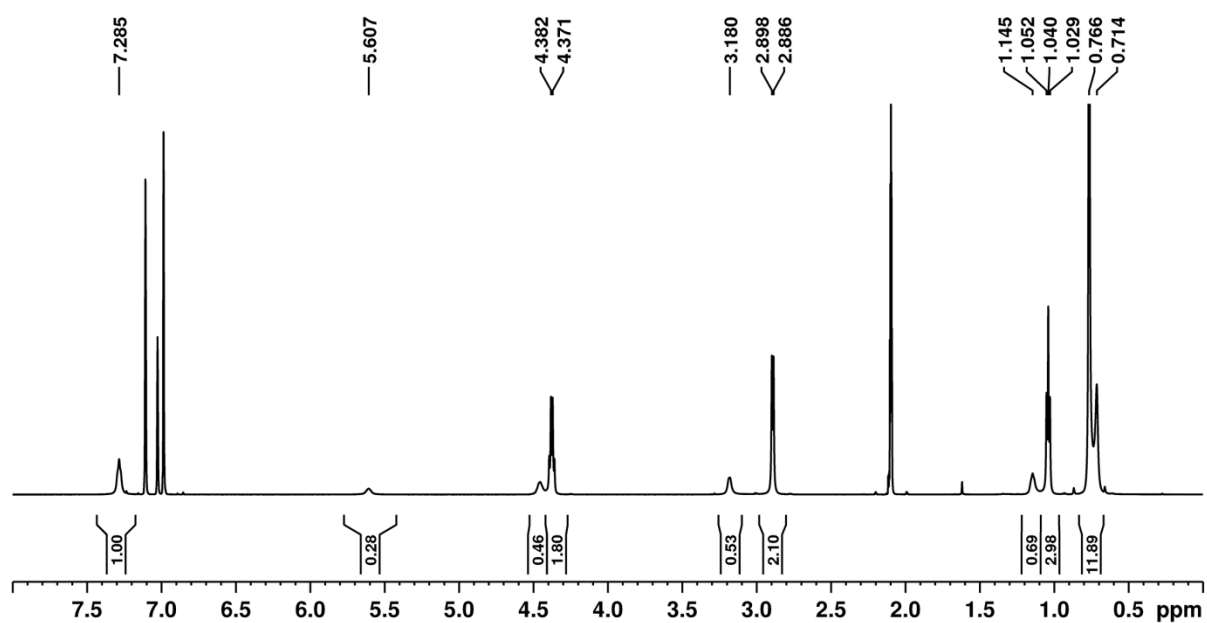

**Figure S3.** <sup>1</sup>H NMR spectrum of ligand 6 in toluene-d<sub>8</sub>.

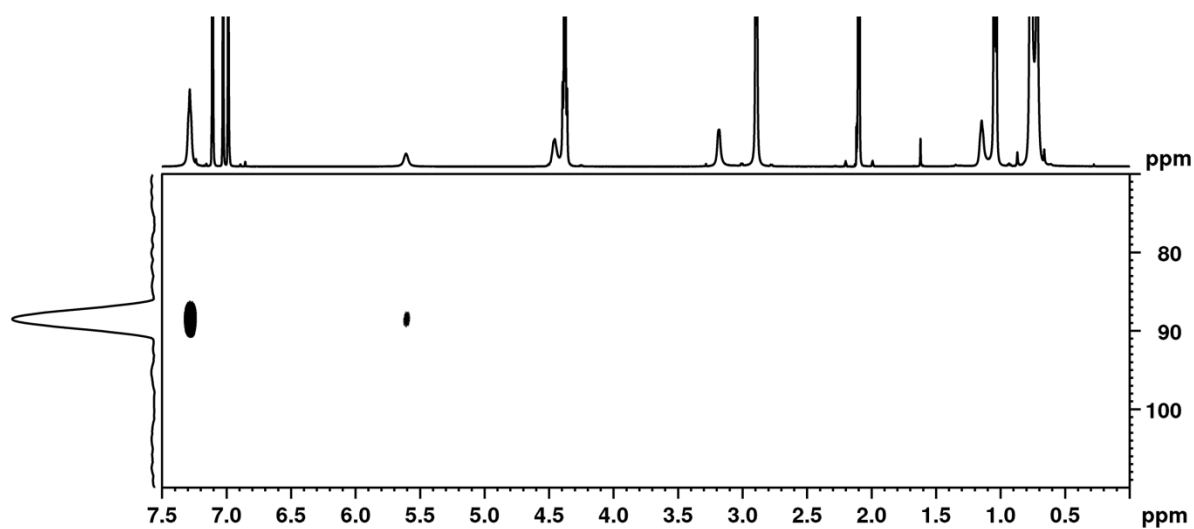

**Figure S4.** <sup>1</sup>H-<sup>15</sup>N HMBC NMR spectrum of ligand 5 in THF-d<sub>8</sub>.

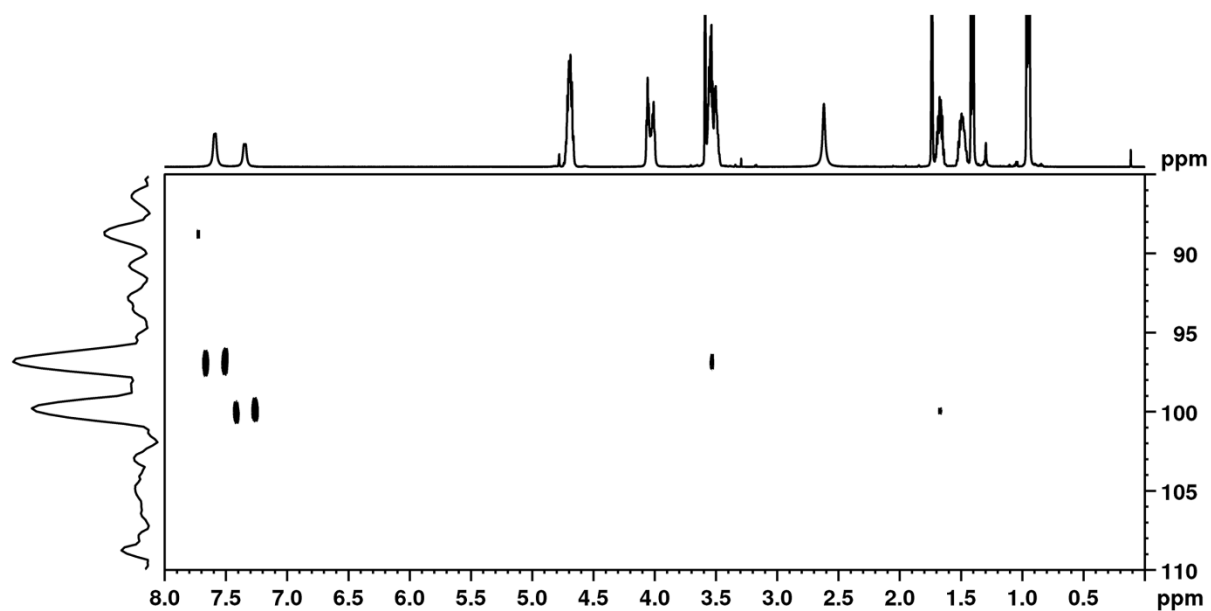

**Figure S5.**  $^1\text{H}$ - $^{15}\text{N}$  HSQC NMR spectrum of ligand **6** in  $\text{THF-d}_8$ .

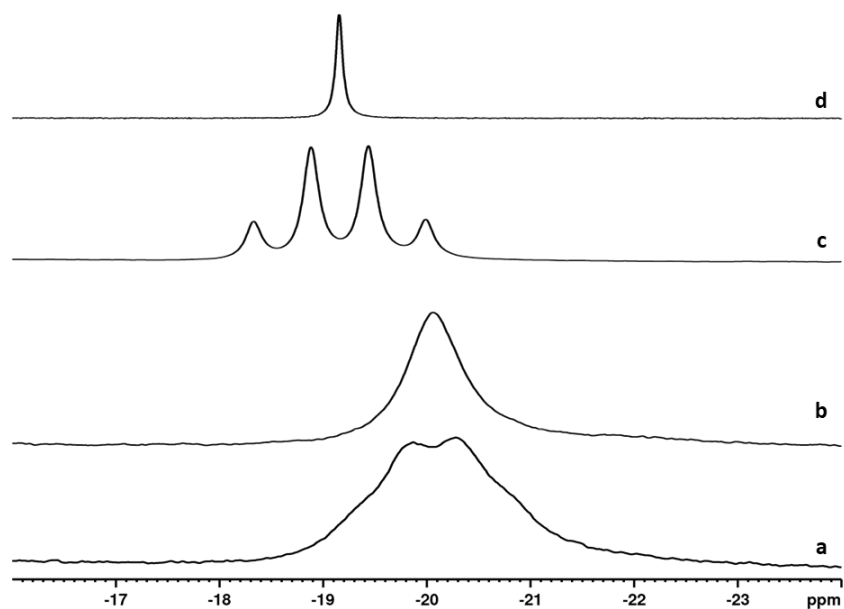

**Figure S6.** a)  $^{11}\text{B}$  and b)  $^{11}\text{B}\{^1\text{H}\}$  spectra of 0.1 M mixture of ligand **2c** and  $\text{BH}_3\cdot\text{SMe}_2$  (1:1 molar ratio) in  $\text{toluene-d}_8$  at room temperature; c)  $^{11}\text{B}$  and d)  $^{11}\text{B}\{^1\text{H}\}$  spectra of pure  $\text{BH}_3\cdot\text{SMe}_2$  in  $\text{toluene-d}_8$ .

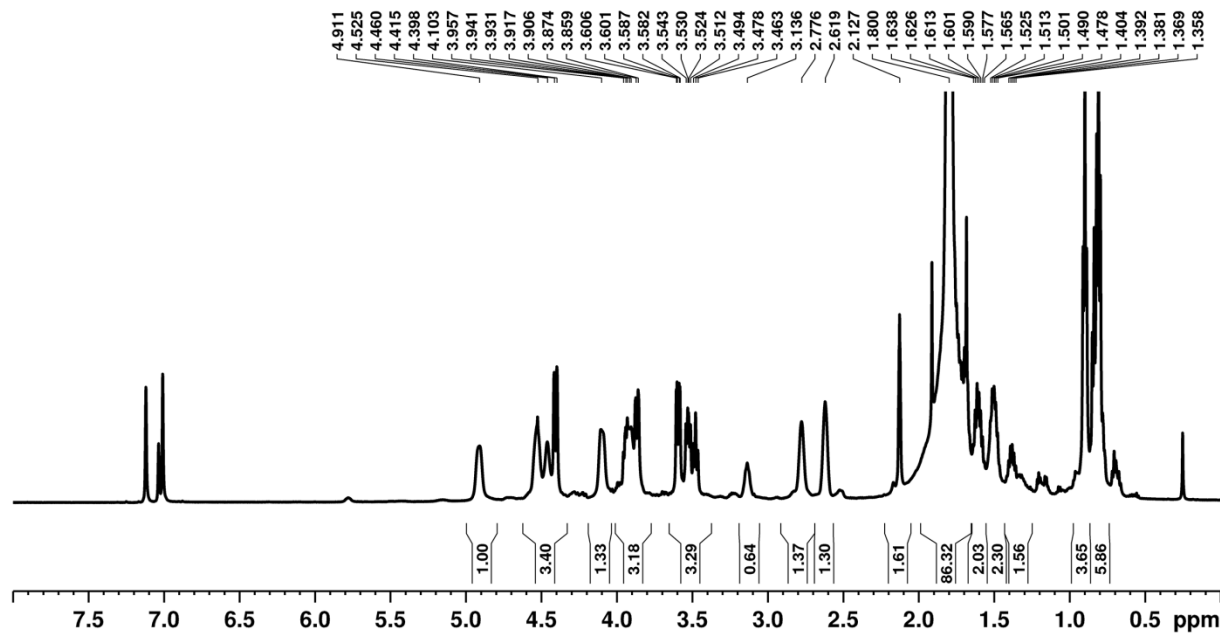

**Figure S7a.**  $^1\text{H}$  NMR spectrum of 2 M mixture of ligand **2c** and  $\text{BH}_3\cdot\text{SMe}_2$  in toluene- $\text{d}_8$ .

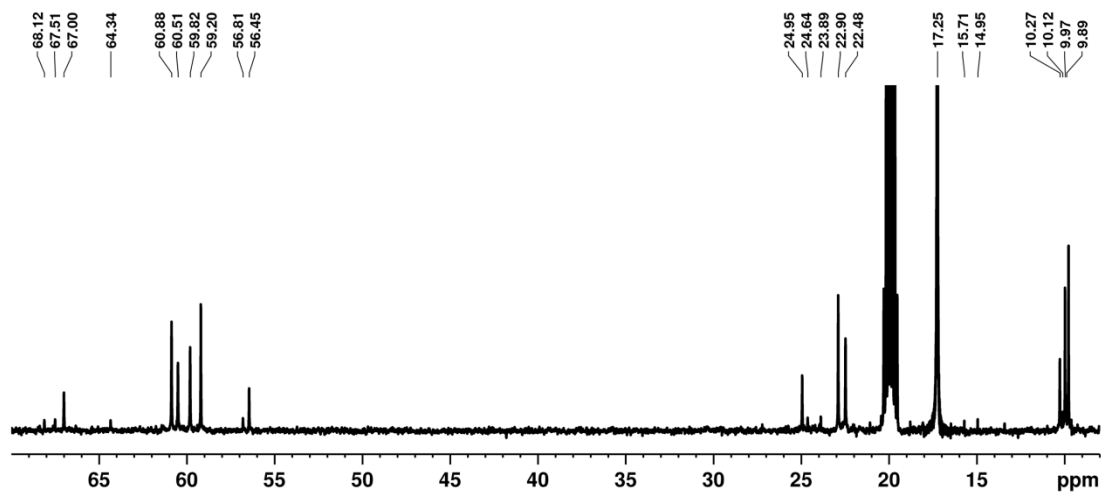

**Figure S7b.**  $^{13}\text{C}\{^1\text{H}\}$  NMR spectrum of 2 M mixture of ligand **2c** and  $\text{BH}_3\cdot\text{SMe}_2$  in toluene- $\text{d}_8$ .

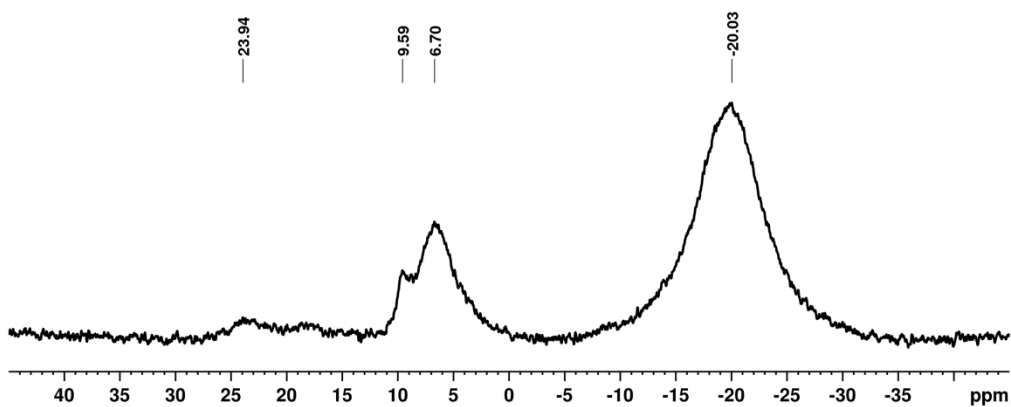

**Figure S8.**  $^{10}\text{B}$  NMR spectrum of 2 M mixture of ligand **2c** and  $\text{BH}_3\cdot\text{SMe}_2$  in toluene- $\text{d}_8$ .

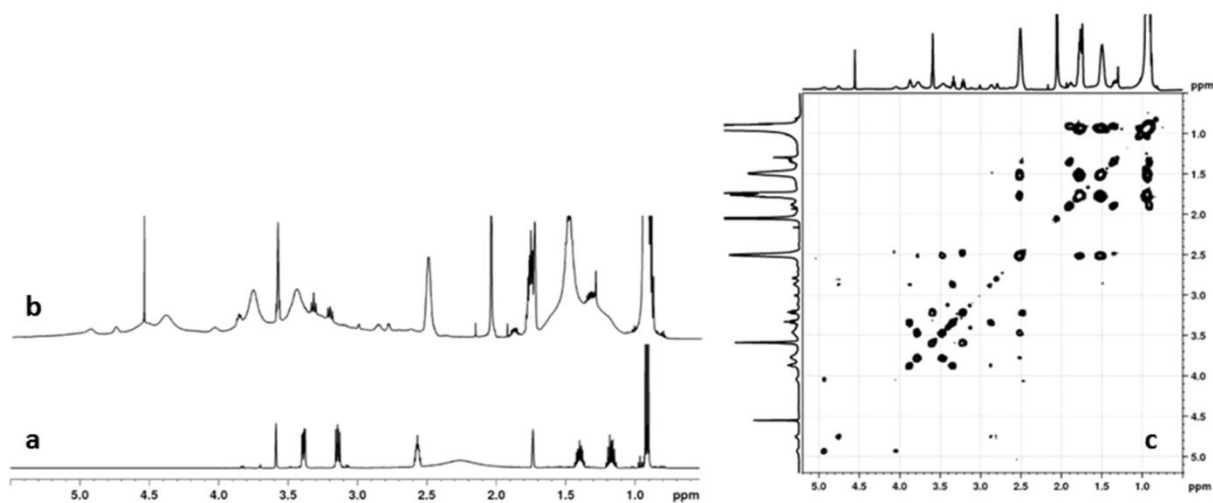

**Figure S9.**  $^1\text{H}$  NMR spectra of: a) pure ligand **2c** in  $\text{THF-d}_8$ , b) mixture of **2c** and  $\text{BH}_3\cdot\text{SMe}_2$  in  $\text{THF-d}_8$ , c) COSY spectrum of mixture of **2c** and  $\text{BH}_3\cdot\text{SMe}_2$  in  $\text{THF-d}_8$ .

Images of  $^1\text{H}$  and  $^{13}\text{C}$  NMR spectra of synthesized compounds:

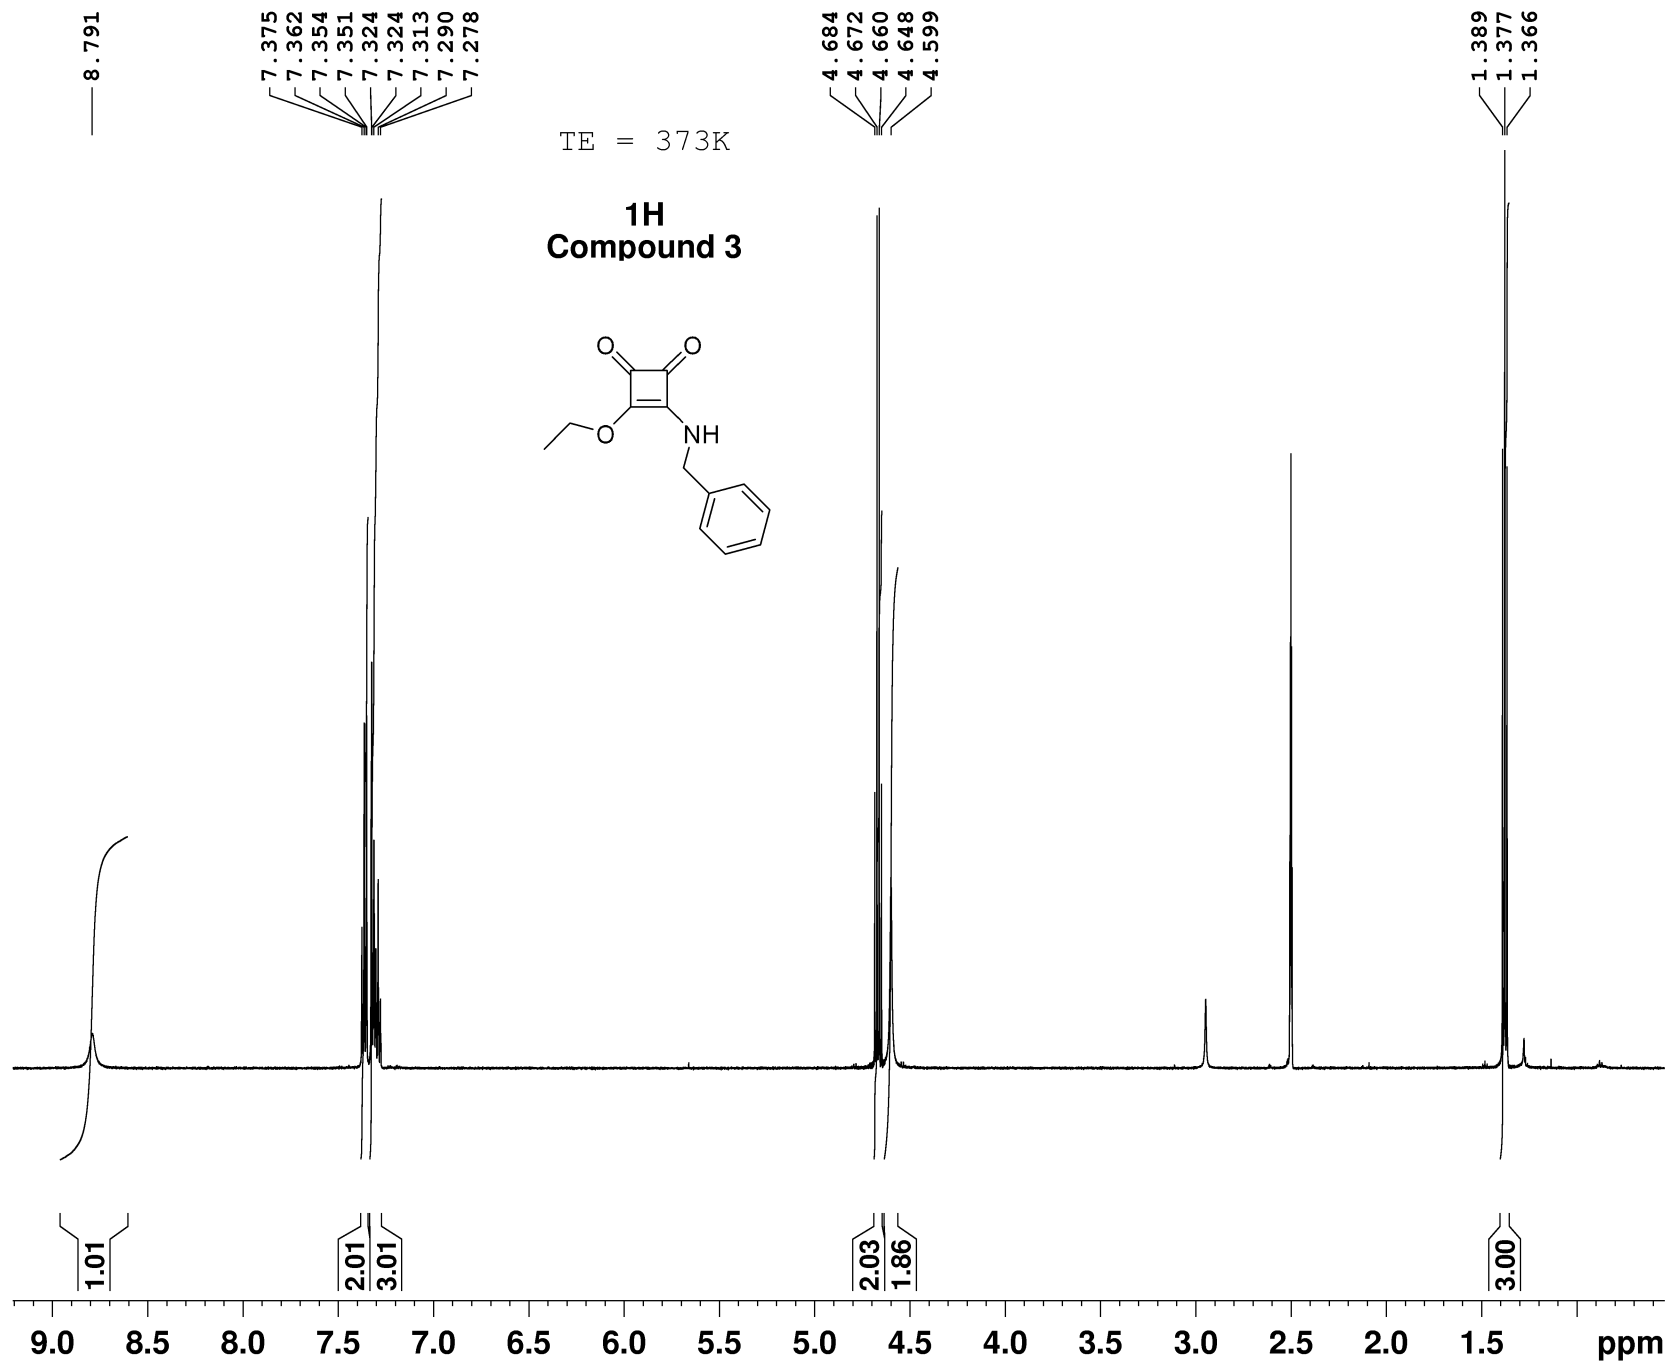

|         |                 |
|---------|-----------------|
| NAME    | YNC-031-03A     |
| EXPNO   | 30              |
| PROCNO  | 1               |
| Date_   | 20190419        |
| Time    | 16.04 h         |
| INSTRUM | spect           |
| PROBHD  | Z847801_0047 (  |
| PULPROG | zg30            |
| TD      | 32768           |
| SOLVENT | DMSO            |
| NS      | 1               |
| DS      | 0               |
| SWH     | 9615.385 Hz     |
| FIDRES  | 0.586877 Hz     |
| AQ      | 1.7039860 sec   |
| RG      | 144             |
| DW      | 52.000 usec     |
| DE      | 13.95 usec      |
| TE      | 373.1 K         |
| D1      | 1.00000000 sec  |
| TD0     | 1               |
| SFO1    | 600.0145608 MHz |
| NUC1    | 1H              |
| P1      | 10.85 usec      |
| SI      | 65536           |
| SF      | 600.0100043 MHz |
| WDW     | no              |
| SSB     | 0               |
| LB      | 0.00 Hz         |
| GB      | 0               |
| PC      | 1.00            |

—188.72  
—182.04  
—176.56  
—172.24

—137.74  
127.92  
126.86  
126.81

T = 373K

—68.25

—46.72

—14.82

<sup>13</sup>C  
Compound 3

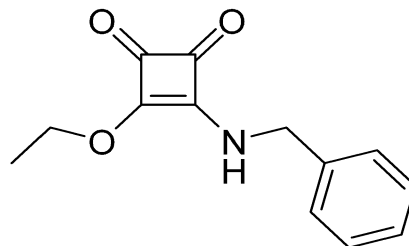

|         |                 |
|---------|-----------------|
| NAME    | YNC-031-03A     |
| EXPNO   | 32              |
| PROCNO  | 1               |
| Date_   | 20190419        |
| Time    | 16.24 h         |
| INSTRUM | spect           |
| PROBHD  | Z847801_0047 (  |
| PULPROG | zgdc30          |
| TD      | 32768           |
| SOLVENT | DMSO            |
| NS      | 512             |
| DS      | 0               |
| SWH     | 36057.691 Hz    |
| FIDRES  | 2.200787 Hz     |
| AQ      | 0.4544329 sec   |
| RG      | 2050            |
| DW      | 13.867 usec     |
| DE      | 6.50 usec       |
| TE      | 373.2 K         |
| D1      | 1.50000000 sec  |
| D11     | 0.03000000 sec  |
| TD0     | 1               |
| SFO1    | 150.8892338 MHz |
| NUC1    | <sup>13</sup> C |
| P1      | 9.80 usec       |
| SI      | 65536           |
| SF      | 150.8727892 MHz |
| WDW     | EM              |
| SSB     | 0               |
| LB      | 1.00 Hz         |
| GB      | 0               |
| PC      | 1.40            |

190 180 170 160 150 140 130 120 110 100 90 80 70 60 50 40 30 ppm



7.138  
7.123

4.832  
4.756

3.800  
3.777  
3.719  
3.619

2.805

1.700  
1.573  
1.479  
1.456

0.986  
0.962

<sup>1</sup>H  
Compound 4

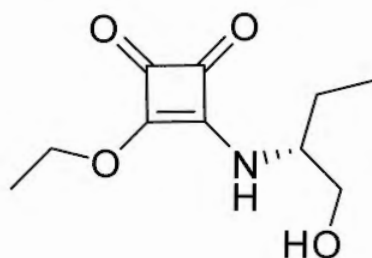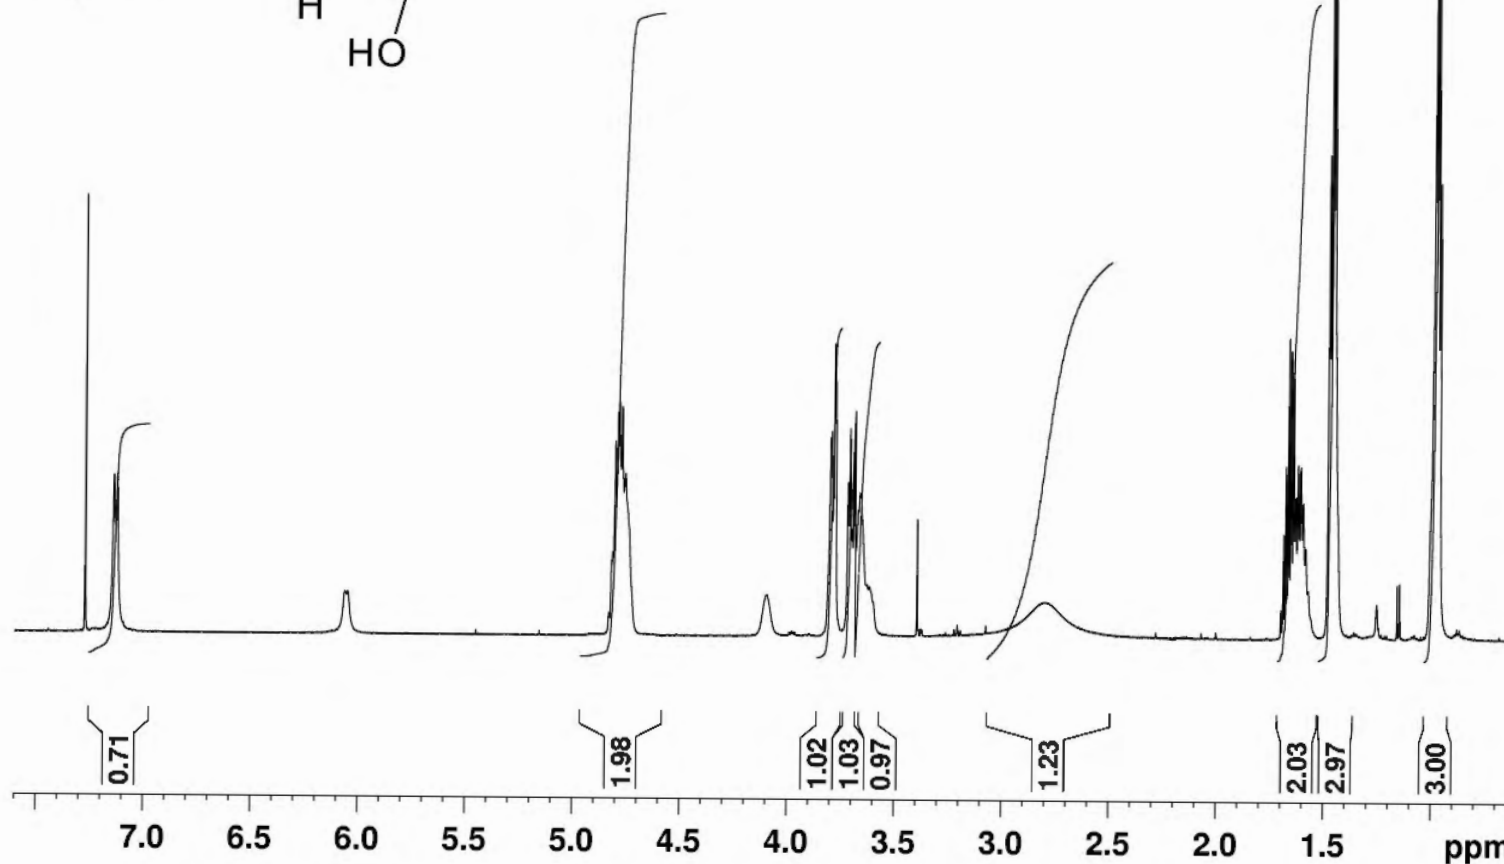

|         |                |
|---------|----------------|
| NAME    | NB_063_03      |
| EXPNO   | 11             |
| PROCNO  | 1              |
| Date_   | 20140402       |
| Time    | 18.59          |
| INSTRUM | spect          |
| PROBHD  | 5 mm PABBO BB- |
| PULPROG | zg30           |
| TD      | 32768          |
| SOLVENT | CDCl3          |
| NS      | 16             |
| DS      | 0              |
| SWH     | 9615.385 Hz    |
| FIDRES  | 0.293438 Hz    |
| AQ      | 1.7039860 sec  |
| RG      | 144            |
| DW      | 52.000 usec    |
| DE      | 13.95 usec     |
| TE      | 293.0 K        |
| D1      | 1.00000000 sec |
| TD0     | 1              |

  

|                        |                 |
|------------------------|-----------------|
| ===== CHANNEL f1 ===== |                 |
| SFO1                   | 600.1345610 MHz |
| NUC1                   | <sup>1</sup> H  |
| P1                     | 10.85 usec      |
| SI                     | 65536           |
| SF                     | 600.1300119 MHz |
| WDW                    | EM              |
| SSB                    | 0               |
| LB                     | 0.10 Hz         |
| GB                     | 0               |
| PC                     | 1.00            |

NAME YNC04004B  
 EXPNO 12  
 PROCNO 1  
 Date\_ 20150513  
 Time 23.21  
 INSTRUM spect  
 PROBHD 5 mm PABBO BB-  
 PULPROG zgdc30  
 TD 32768  
 SOLVENT CDC13  
 NS 512  
 DS 0  
 SWH 36057.691 Hz  
 FIDRES 1.100393 Hz  
 AQ 0.4544329 sec  
 RG 2050  
 DW 13.867 usec  
 DE 6.50 usec  
 TE 298.0 K  
 D1 1.50000000 sec  
 D11 0.03000000 sec  
 TD0 1

===== CHANNEL f1 =====  
 SFO1 150.9143788 MHz  
 NUC1 13C  
 P1 9.80 usec  
 SI 65536  
 SF 150.8977842 MHz  
 WDW EM  
 SSB 0  
 LB 1.00 Hz  
 GB 0  
 PC 1.40

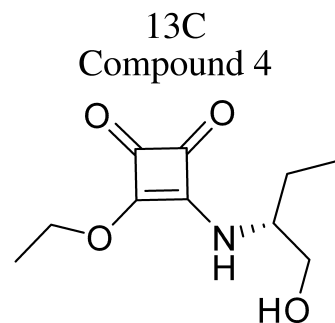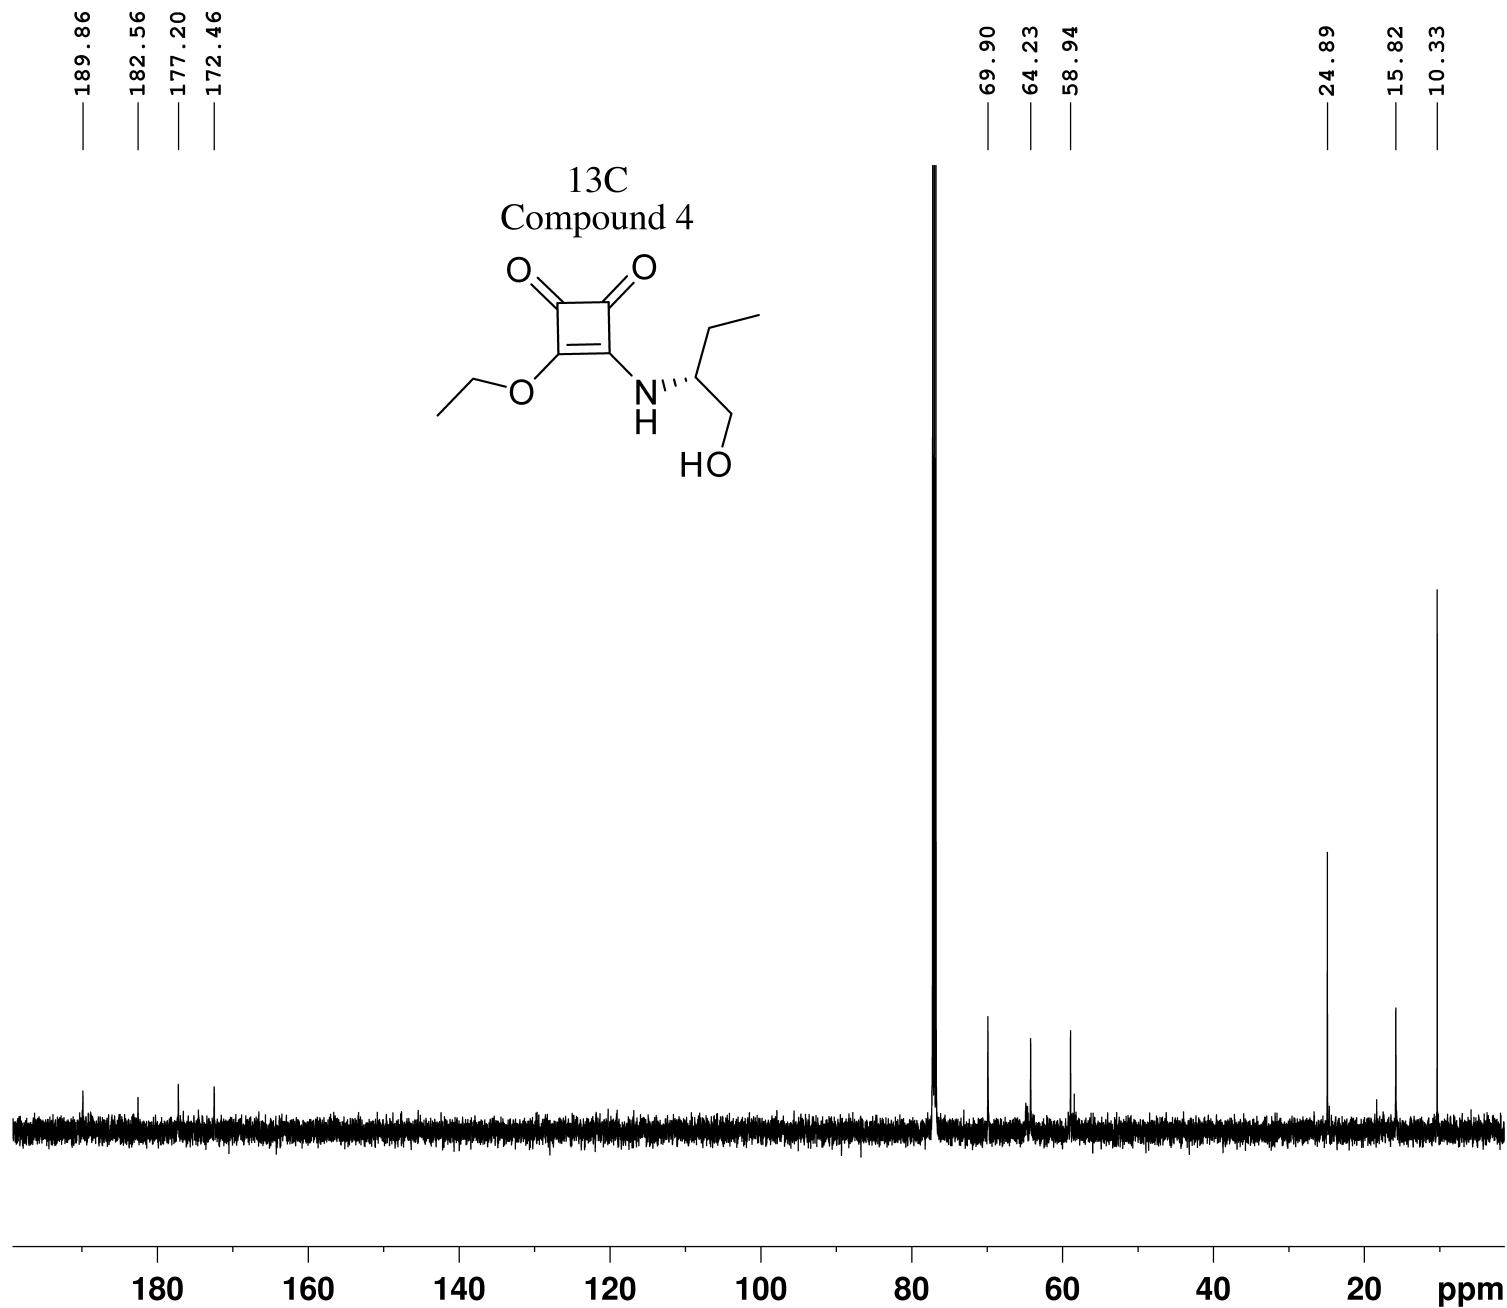

7.278  
7.263

4.829  
4.728

3.791  
3.786  
3.772  
3.768  
3.711  
3.650

1.694  
1.570  
1.478  
1.438

0.983  
0.971  
0.958

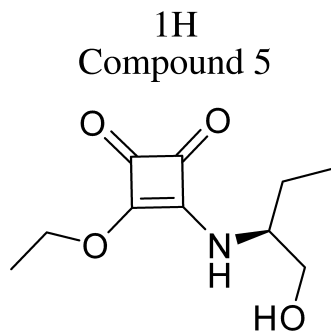

NAME NB\_077\_02  
EXPNO 11  
PROCNO 1  
Date\_ 20140605  
Time 18.05  
INSTRUM spect  
PROBHD 5 mm PABBO BB-  
PULPROG zg30  
TD 32768  
SOLVENT CDC13  
NS 16  
DS 0  
SWH 9615.385 Hz  
FIDRES 0.293438 Hz  
AQ 1.7039860 sec  
RG 144  
DW 52.000 usec  
DE 13.95 usec  
TE 293.0 K  
D1 1.00000000 sec  
TD0 1

===== CHANNEL f1 =====  
SFO1 600.1345610 MHz  
NUC1 1H  
P1 10.85 usec  
SI 65536  
SF 600.1300069 MHz  
WDW EM  
SSB 0  
LB 0.10 Hz  
GB 0  
PC 1.00

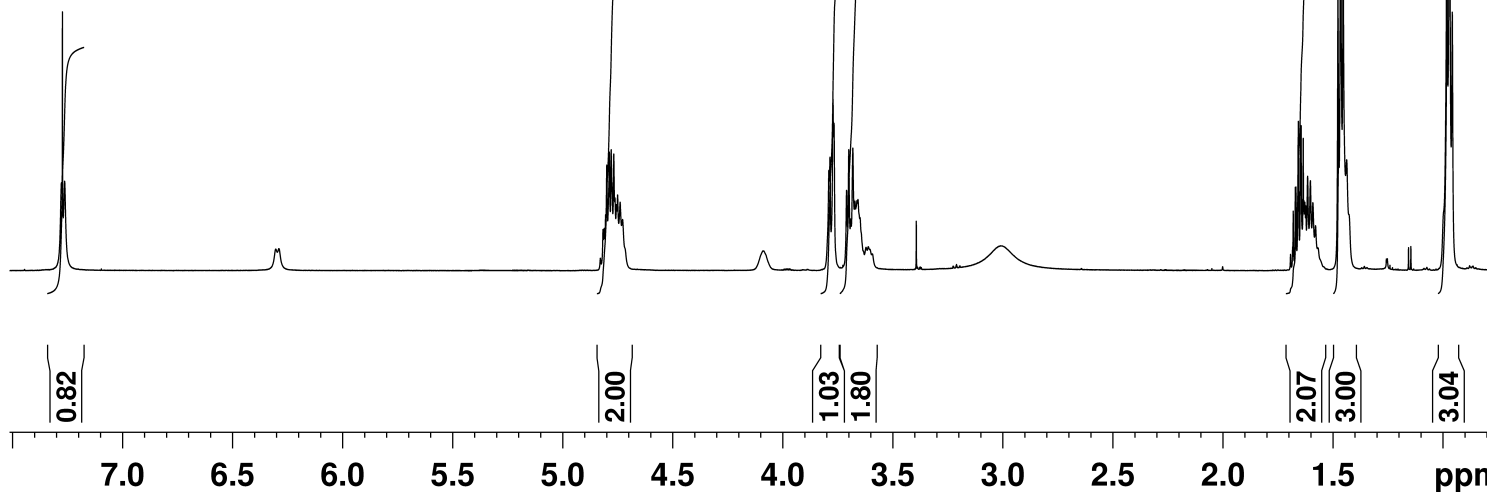

—189.88  
—182.52  
—177.12  
—172.45

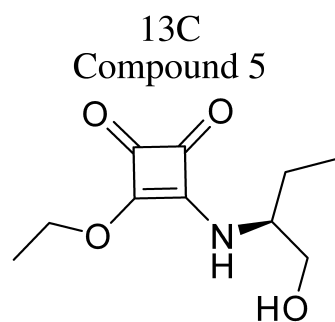

—69.88  
—64.15  
—58.98

—24.84  
—15.82  
—10.34

NAME DL-175A  
EXPNO 12  
PROCNO 1  
Date\_ 20140207  
Time 18.17  
INSTRUM spect  
PROBHD 5 mm PABBO BB-  
PULPROG zgdc30  
TD 32768  
SOLVENT CDC13  
NS 128  
DS 0  
SWH 36057.691 Hz  
FIDRES 1.100393 Hz  
AQ 0.4544329 sec  
RG 2050  
DW 13.867 usec  
DE 7.48 usec  
TE 293.1 K  
D1 1.5000000 sec  
D11 0.0300000 sec  
TD0 1

===== CHANNEL f1 =====  
SFO1 150.9188042 MHz  
NUC1 13C  
P1 10.75 usec  
SI 65536  
SF 150.9028181 MHz  
WDW EM  
SSB 0  
LB 1.00 Hz  
GB 0  
PC 1.00

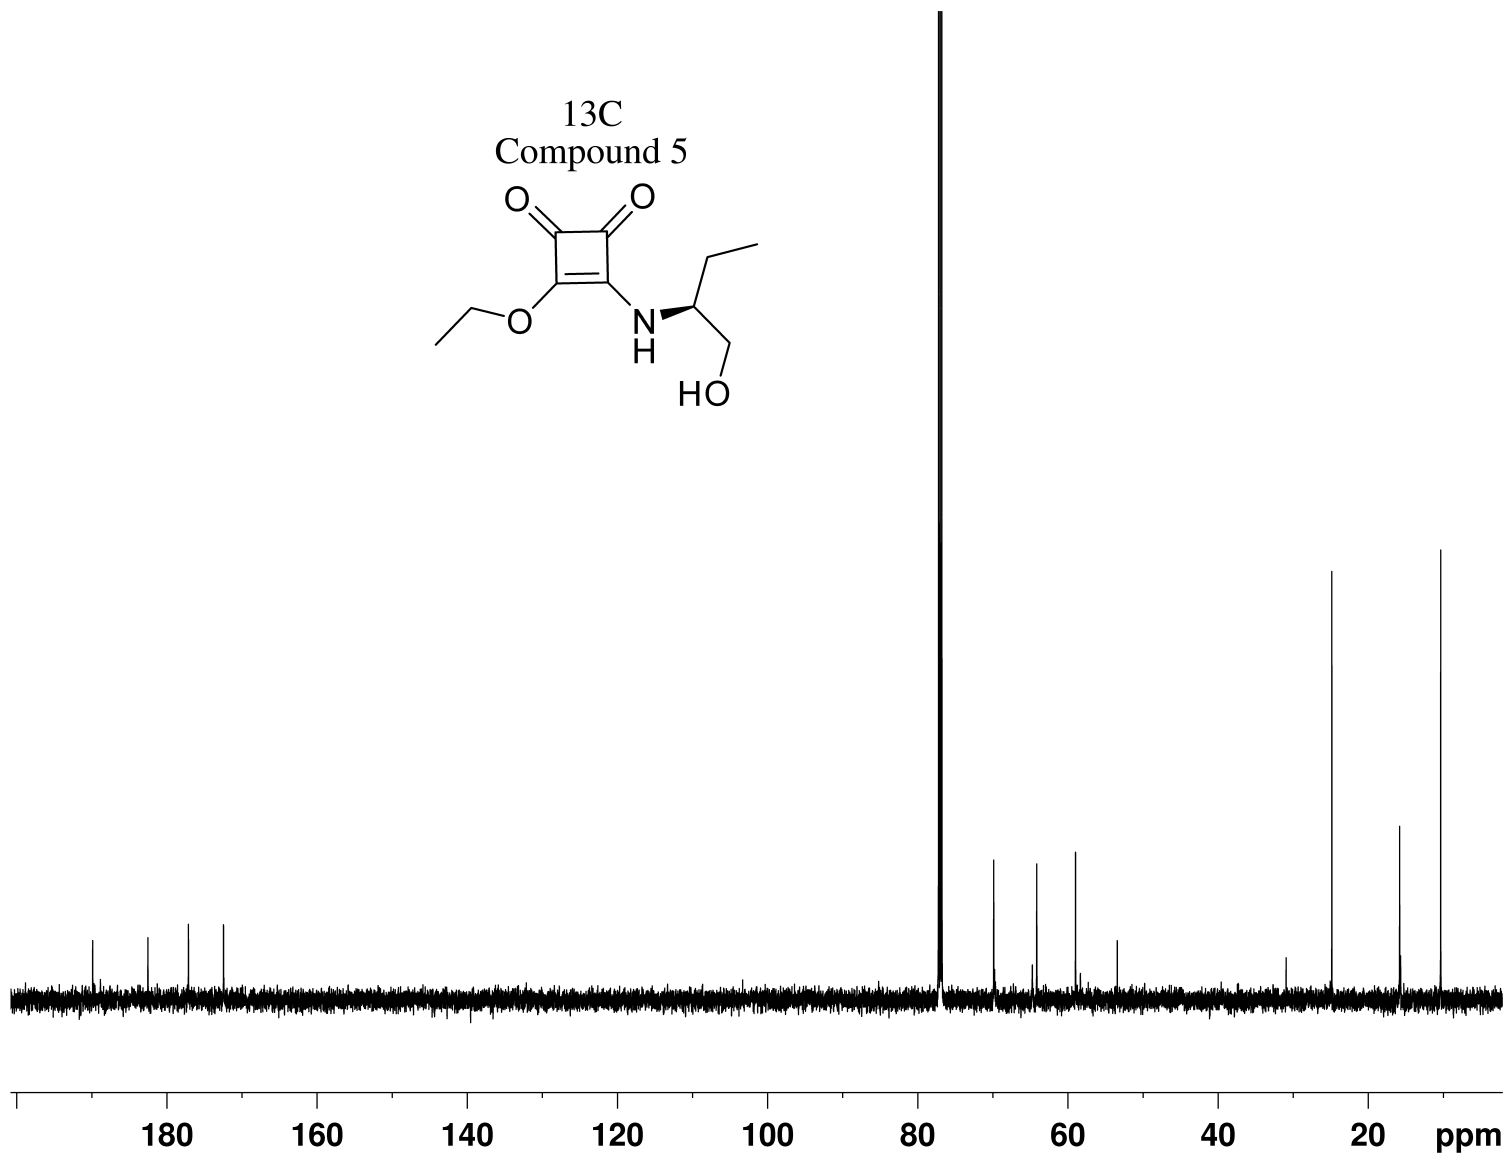

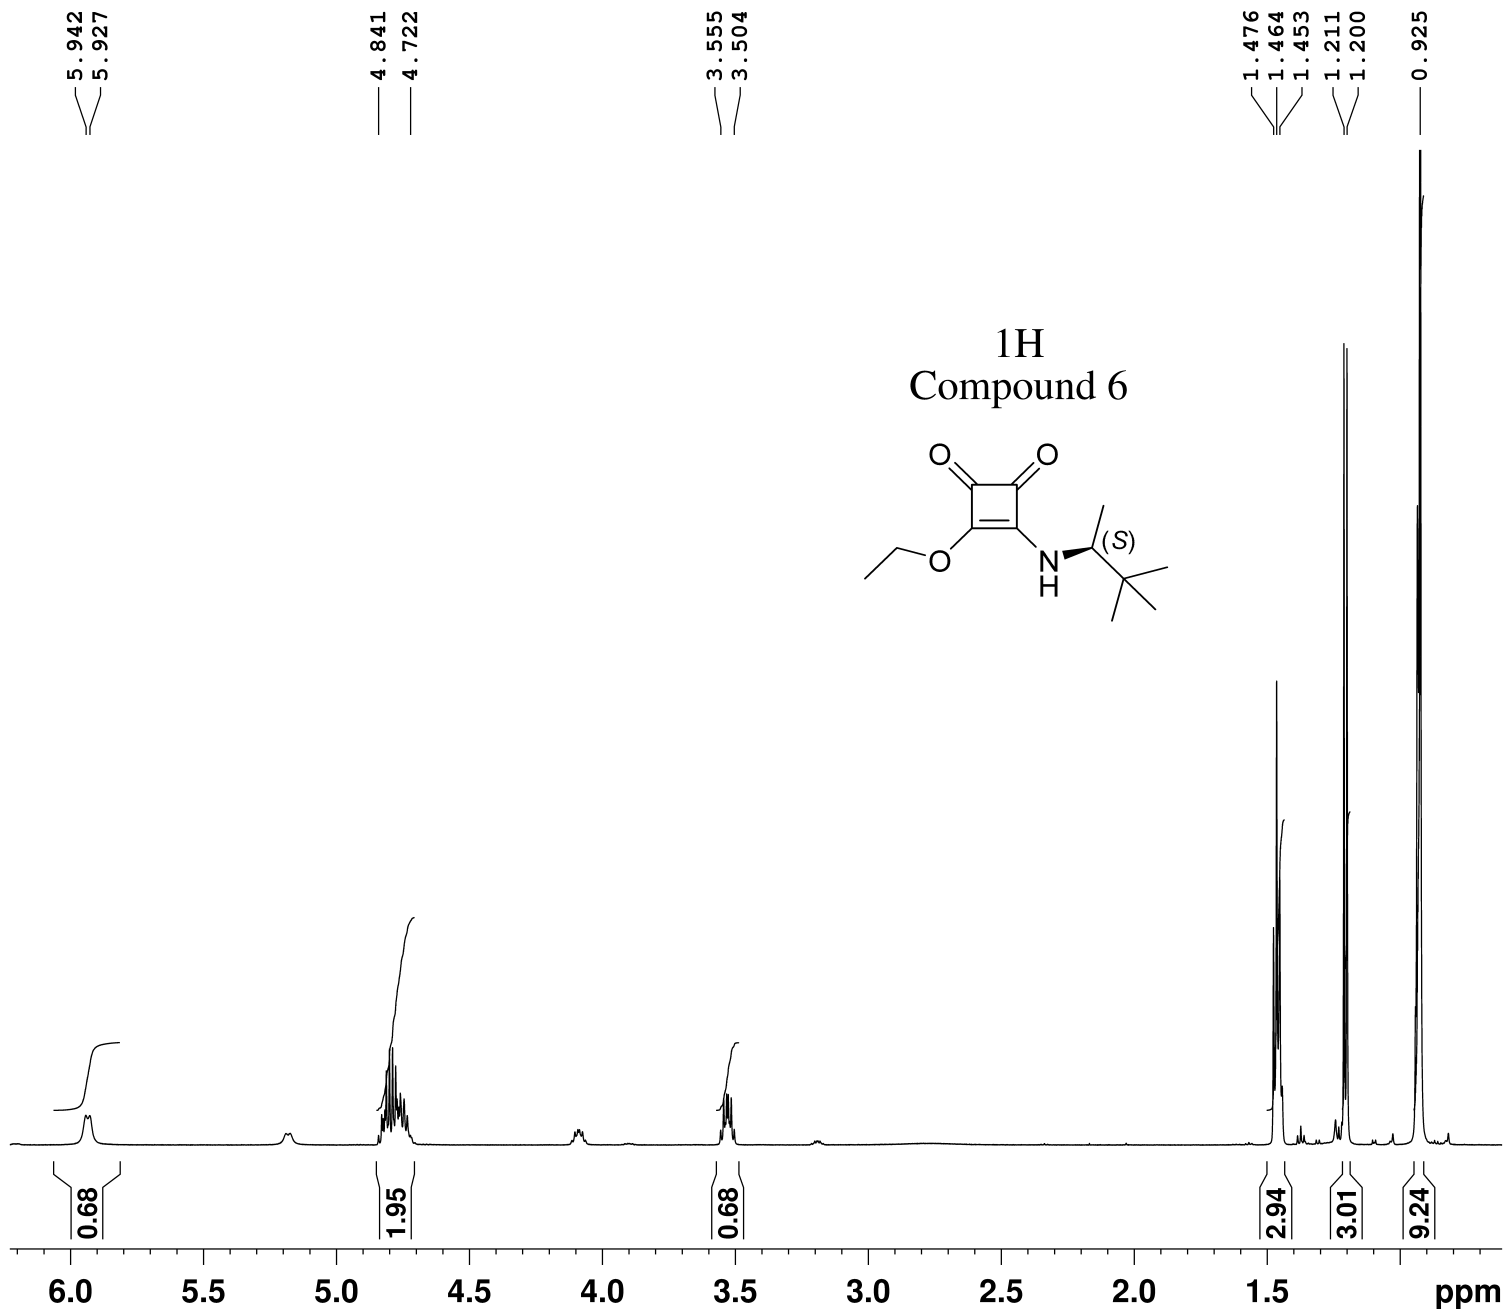

|         |                |      |
|---------|----------------|------|
| NAME    | NB03902AB      |      |
| EXPNO   | 21             |      |
| PROCNO  | 1              |      |
| Date_   | 20160830       |      |
| Time    | 16.44          |      |
| INSTRUM | spect          |      |
| PROBHD  | 5 mm PABBO BB- |      |
| PULPROG | zg30           |      |
| TD      | 32768          |      |
| SOLVENT | CDC13          |      |
| NS      | 16             |      |
| DS      | 0              |      |
| SWH     | 9615.385       | Hz   |
| FIDRES  | 0.293438       | Hz   |
| AQ      | 1.7039860      | sec  |
| RG      | 203            |      |
| DW      | 52.000         | usec |
| DE      | 13.95          | usec |
| TE      | 293.0 K        |      |
| D1      | 1.00000000     | sec  |
| TD0     | 1              |      |

  

|                        |             |      |
|------------------------|-------------|------|
| ===== CHANNEL f1 ===== |             |      |
| SFO1                   | 600.1145608 | MHz  |
| NUC1                   | 1H          |      |
| P1                     | 10.85       | usec |
| SI                     | 65536       |      |
| SF                     | 600.1100148 | MHz  |
| WDW                    | EM          |      |
| SSB                    | 0           |      |
| LB                     | 0.00        | Hz   |
| GB                     | 0           |      |
| PC                     | 1.00        |      |

—189.24  
—182.81  
—176.51  
—171.99

<sup>13</sup>C  
Compound 6

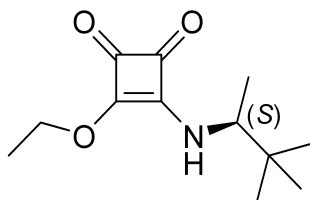

—69.60  
—59.95

—34.91  
—25.75

—16.57  
—15.89

NAME NB03902AB  
EXPNO 22  
PROCNO 1  
Date\_ 20160830  
Time 16.48  
INSTRUM spect  
PROBHD 5 mm PABBO BB-  
PULPROG zgdc30  
TD 32768  
SOLVENT CDC13  
NS 128  
DS 0  
SWH 36057.691 Hz  
FIDRES 1.100393 Hz  
AQ 0.4544329 sec  
RG 2050  
DW 13.867 usec  
DE 6.50 usec  
TE 293.0 K  
D1 1.50000000 sec  
D11 0.03000000 sec  
TD0 1

===== CHANNEL f1 =====  
SFO1 150.9143788 MHz  
NUC1 13C  
P1 9.80 usec  
SI 65536  
SF 150.8977867 MHz  
WDW EM  
SSB 0  
LB 1.00 Hz  
GB 0  
PC 1.40

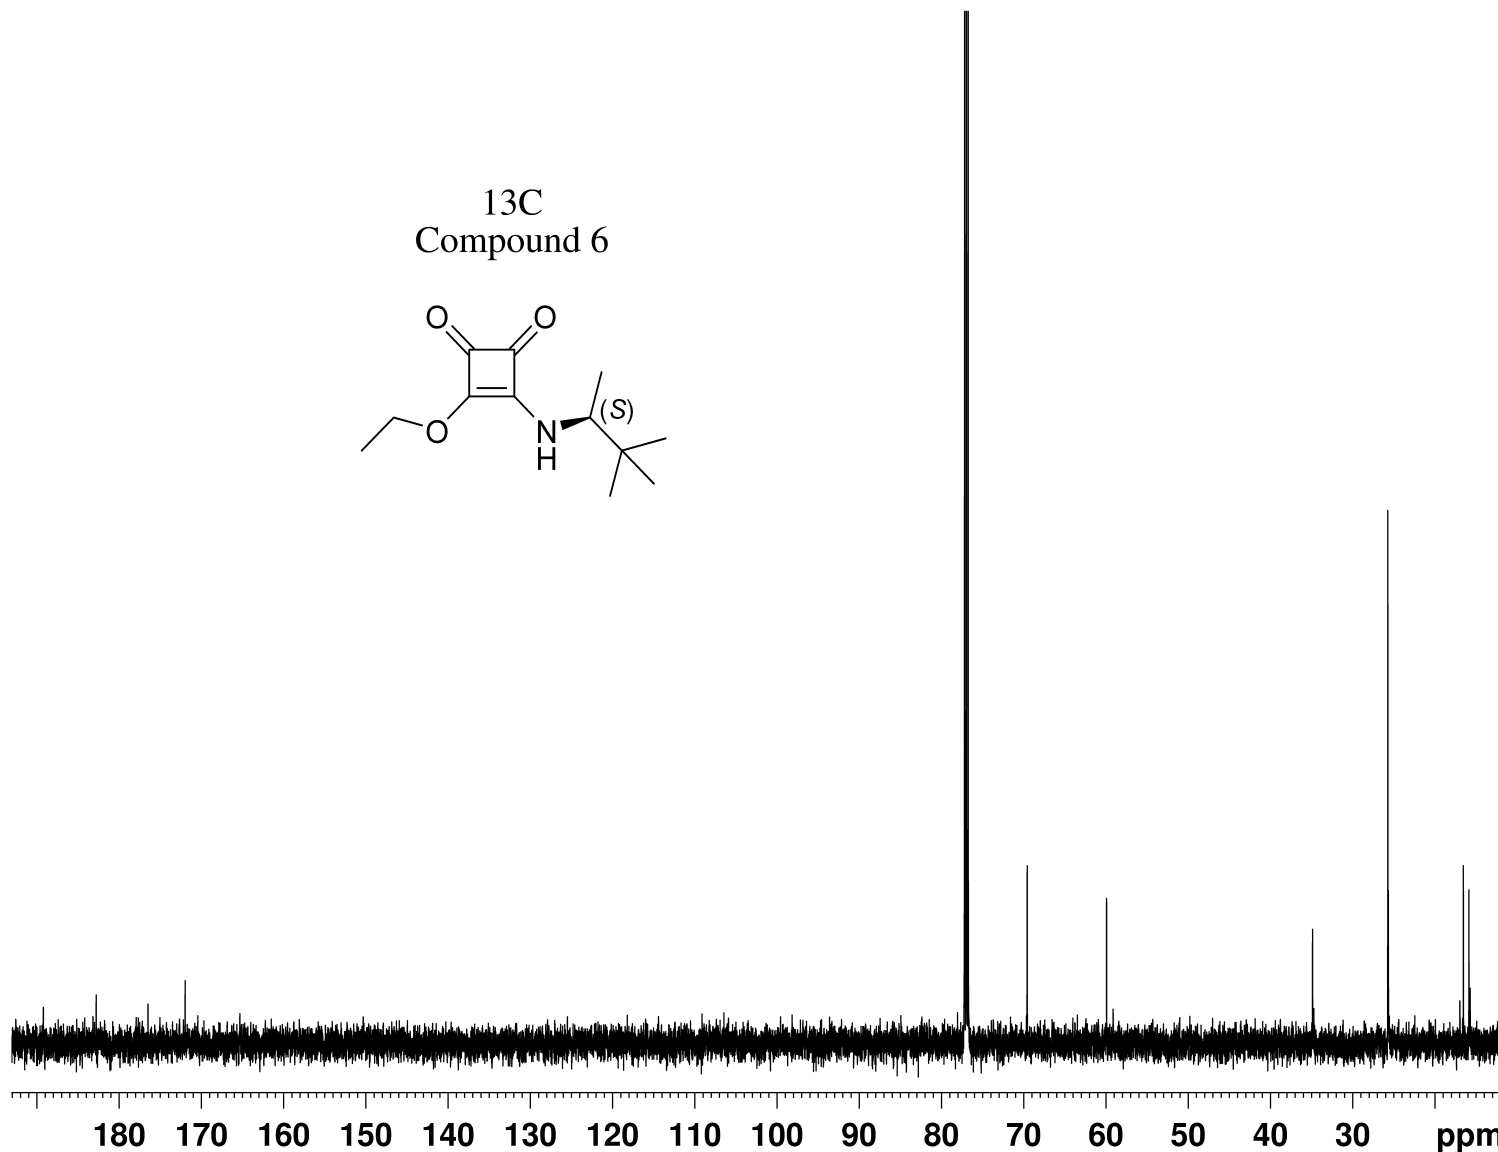

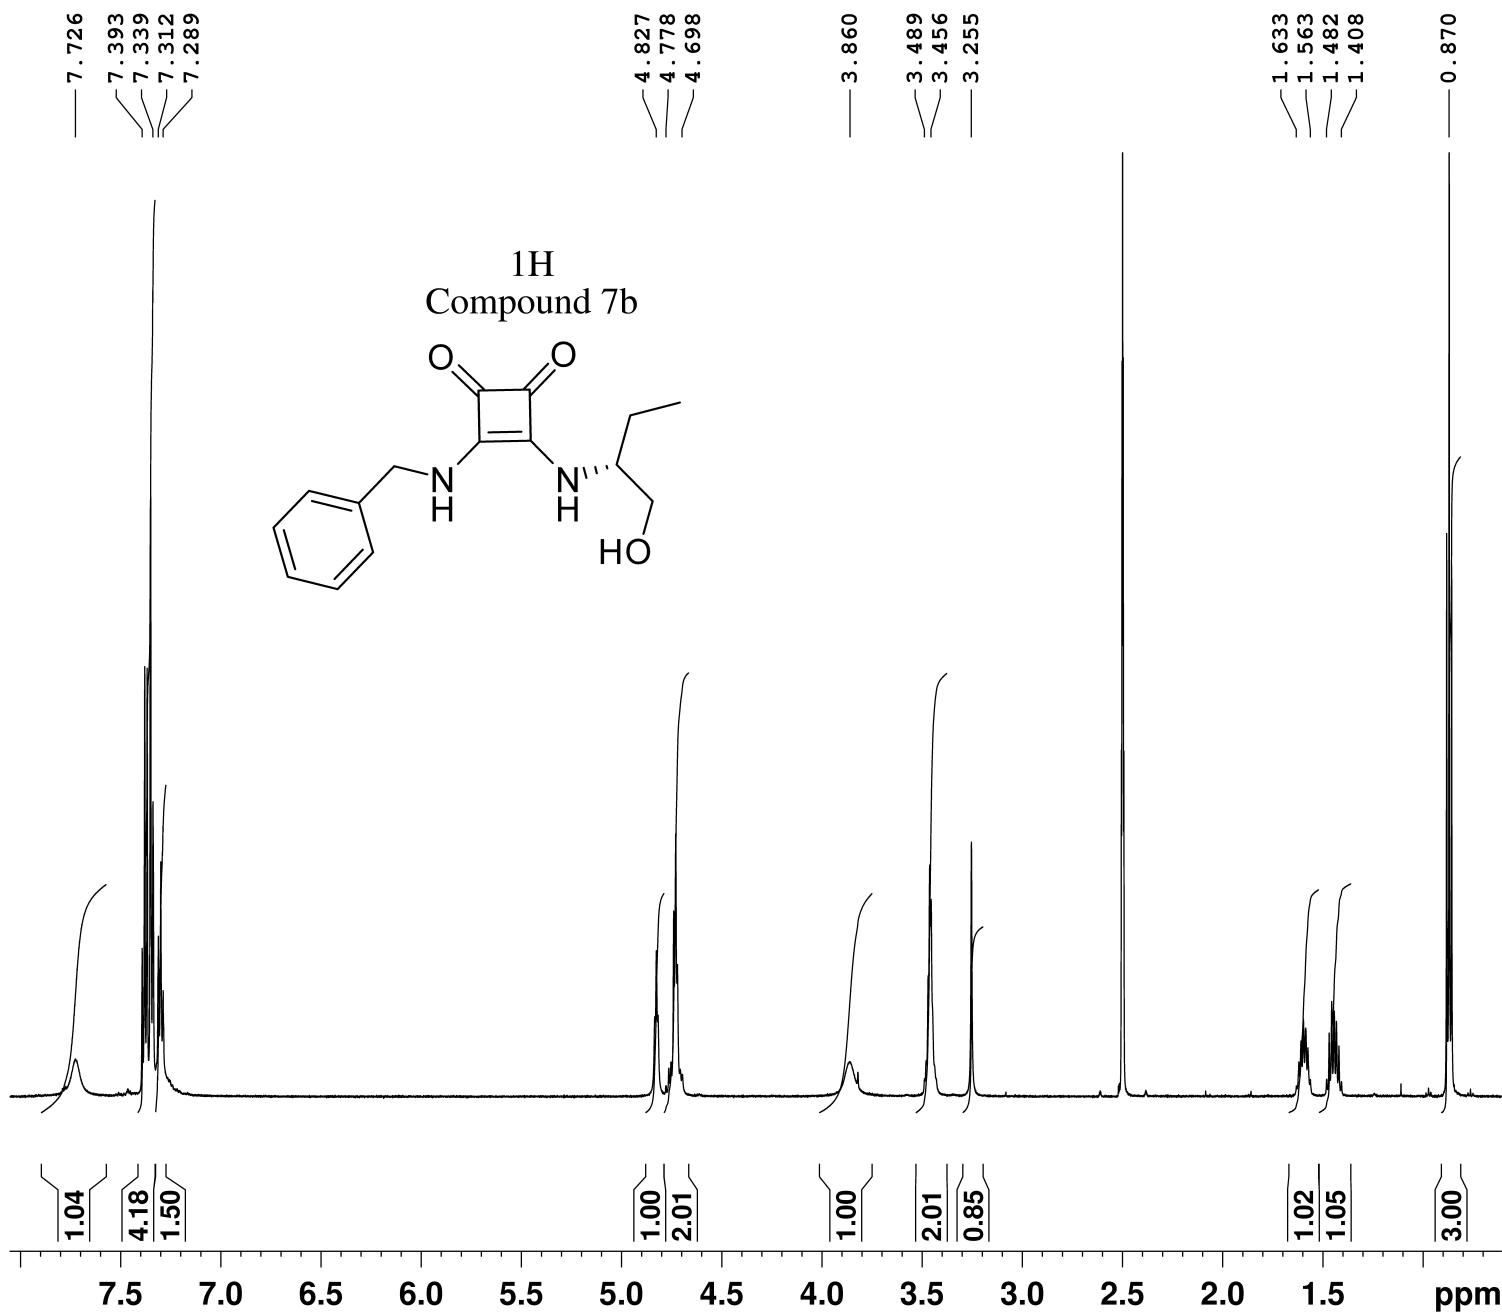

NAME NB67B  
 EXPNO 1  
 PROCNO 1  
 Date\_ 20140627  
 Time 13.57  
 INSTRUM spect  
 PROBHD 5 mm PABBO BB-  
 PULPROG zg30  
 TD 32768  
 SOLVENT DMSO  
 NS 1  
 DS 0  
 SWH 9615.385 Hz  
 FIDRES 0.293438 Hz  
 AQ 1.7039860 sec  
 RG 144  
 DW 52.000 usec  
 DE 13.95 usec  
 TE 313.0 K  
 D1 1.00000000 sec  
 TD0 1

===== CHANNEL f1 =====  
 SFO1 600.1345610 MHz  
 NUC1 1H  
 P1 10.85 usec  
 SI 65536  
 SF 600.1300049 MHz  
 WDW no  
 SSB 0  
 LB 0.00 Hz  
 GB 0  
 PC 1.00

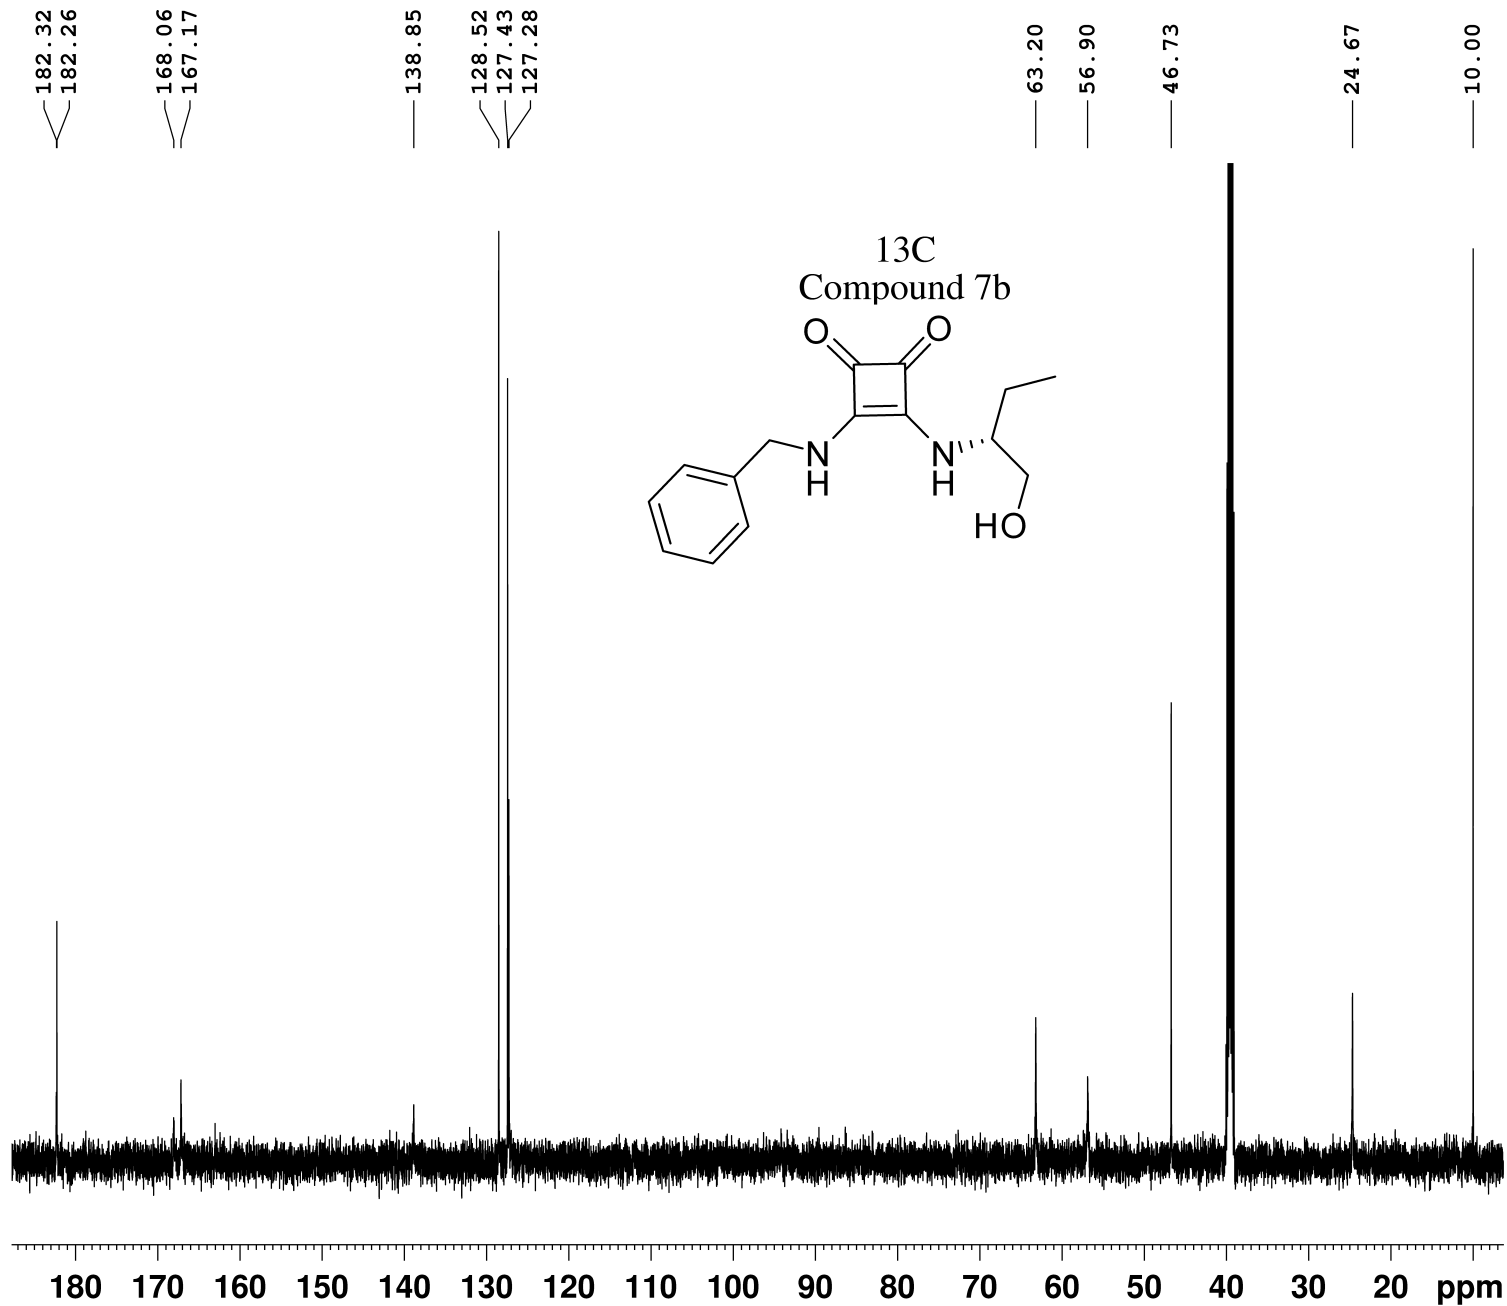

```

NAME                NB67B
EXPNO                3
PROCNO               2
Date_                20140627
Time                14.33
INSTRUM              spect
PROBHD               5 mm PABBO BB-
PULPROG              zgdc30
TD                   32768
SOLVENT              DMSO
NS                   512
DS                   0
SWH                  36057.691 Hz
FIDRES               1.100393 Hz
AQ                   0.4544329 sec
RG                   2050
DW                   13.867 usec
DE                   7.48 usec
TE                   313.0 K
D1                   1.50000000 sec
D11                  0.03000000 sec
TD0                  1
  
```

```

===== CHANNEL f1 =====
SFO1                  150.9188042 MHz
NUC1                   13C
P1                    10.75 usec
SI                    65536
SF                    150.9028994 MHz
WDW                    EM
SSB                    0
LB                    1.00 Hz
GB                    0
PC                    1.00
  
```



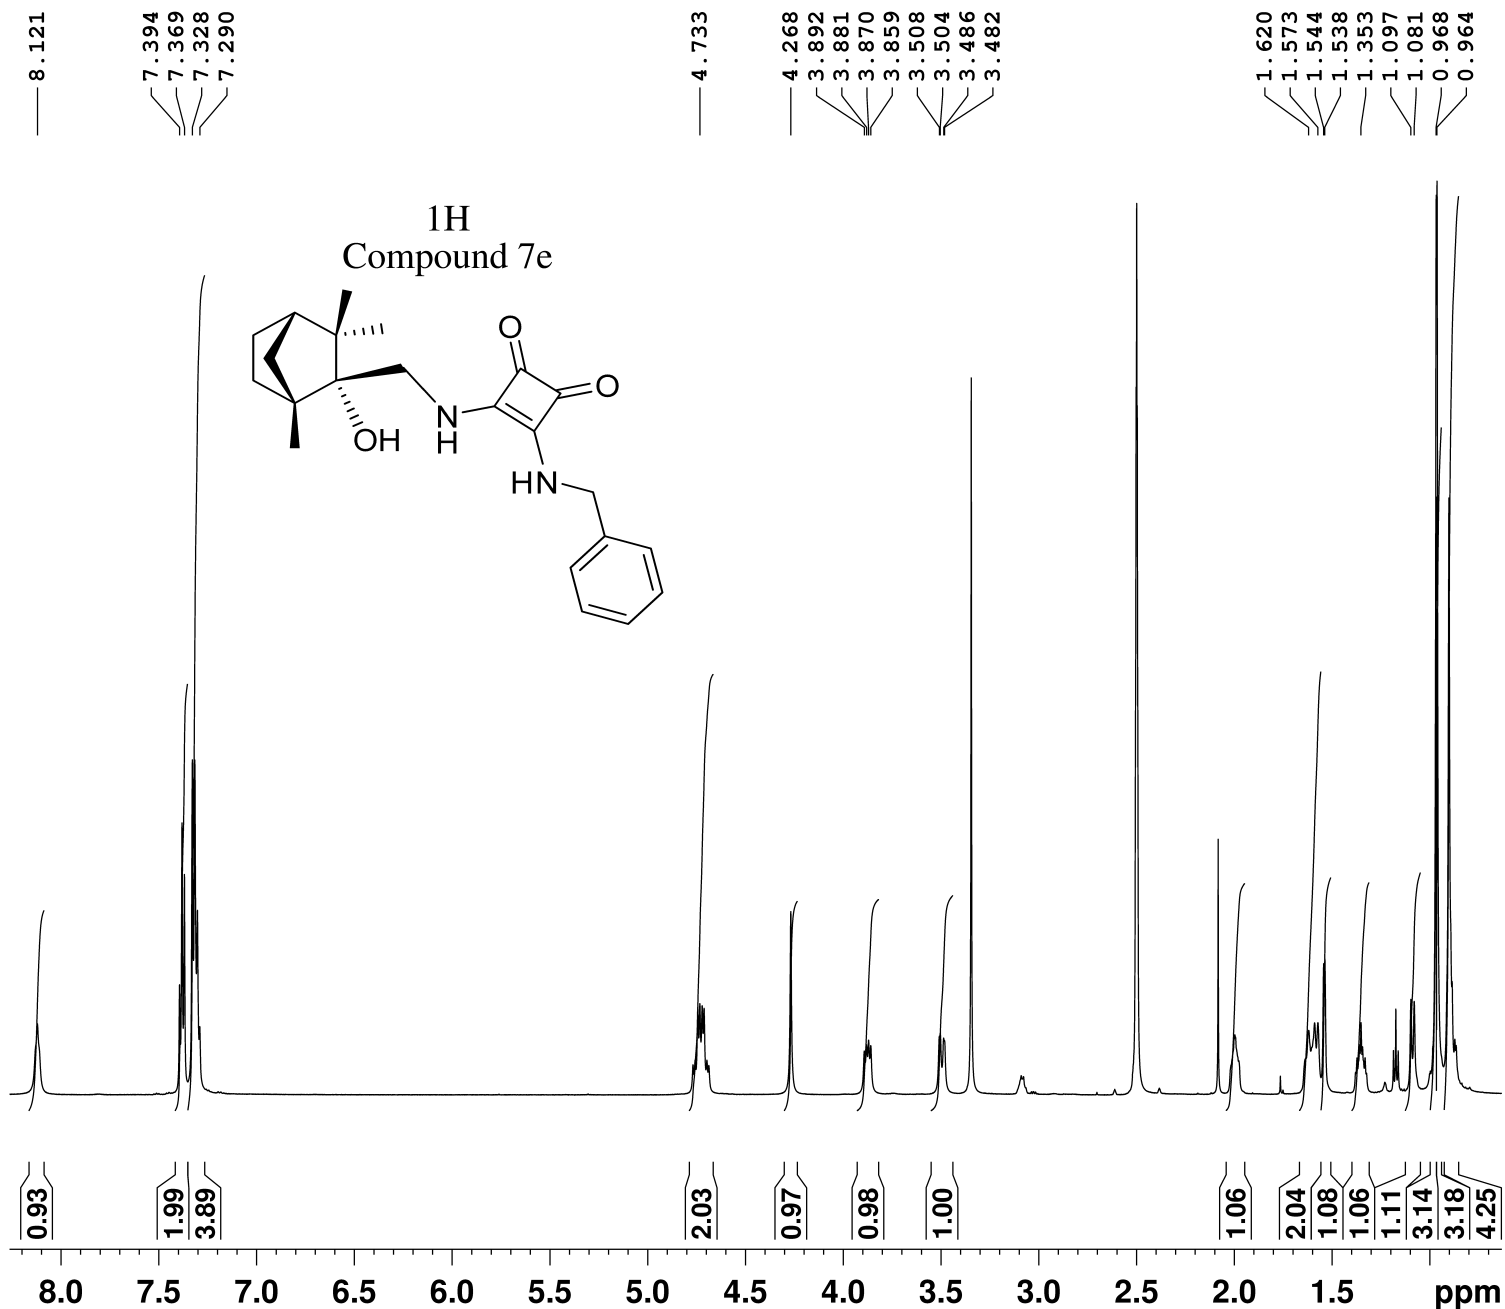

```

NAME          YNC00703A
EXPNO          11
PROCNO         1
Date_          20141121
Time           22.05
INSTRUM        spect
PROBHD         5 mm PABBO BB-
PULPROG        zg30
TD             32768
SOLVENT        DMSO
NS             32
DS             0
SWH            9615.385 Hz
FIDRES         0.293438 Hz
AQ            1.7039860 sec
RG             144
DW            52.000 usec
DE            13.95 usec
TE            293.0 K
D1            1.00000000 sec
TD0            1

===== CHANNEL f1 =====
SFO1          600.1345610 MHz
NUC1           1H
P1            10.85 usec
SI            65536
SF            600.1300046 MHz
WDW            EM
SSB            0
LB            0.10 Hz
GB            0
PC            1.00
  
```

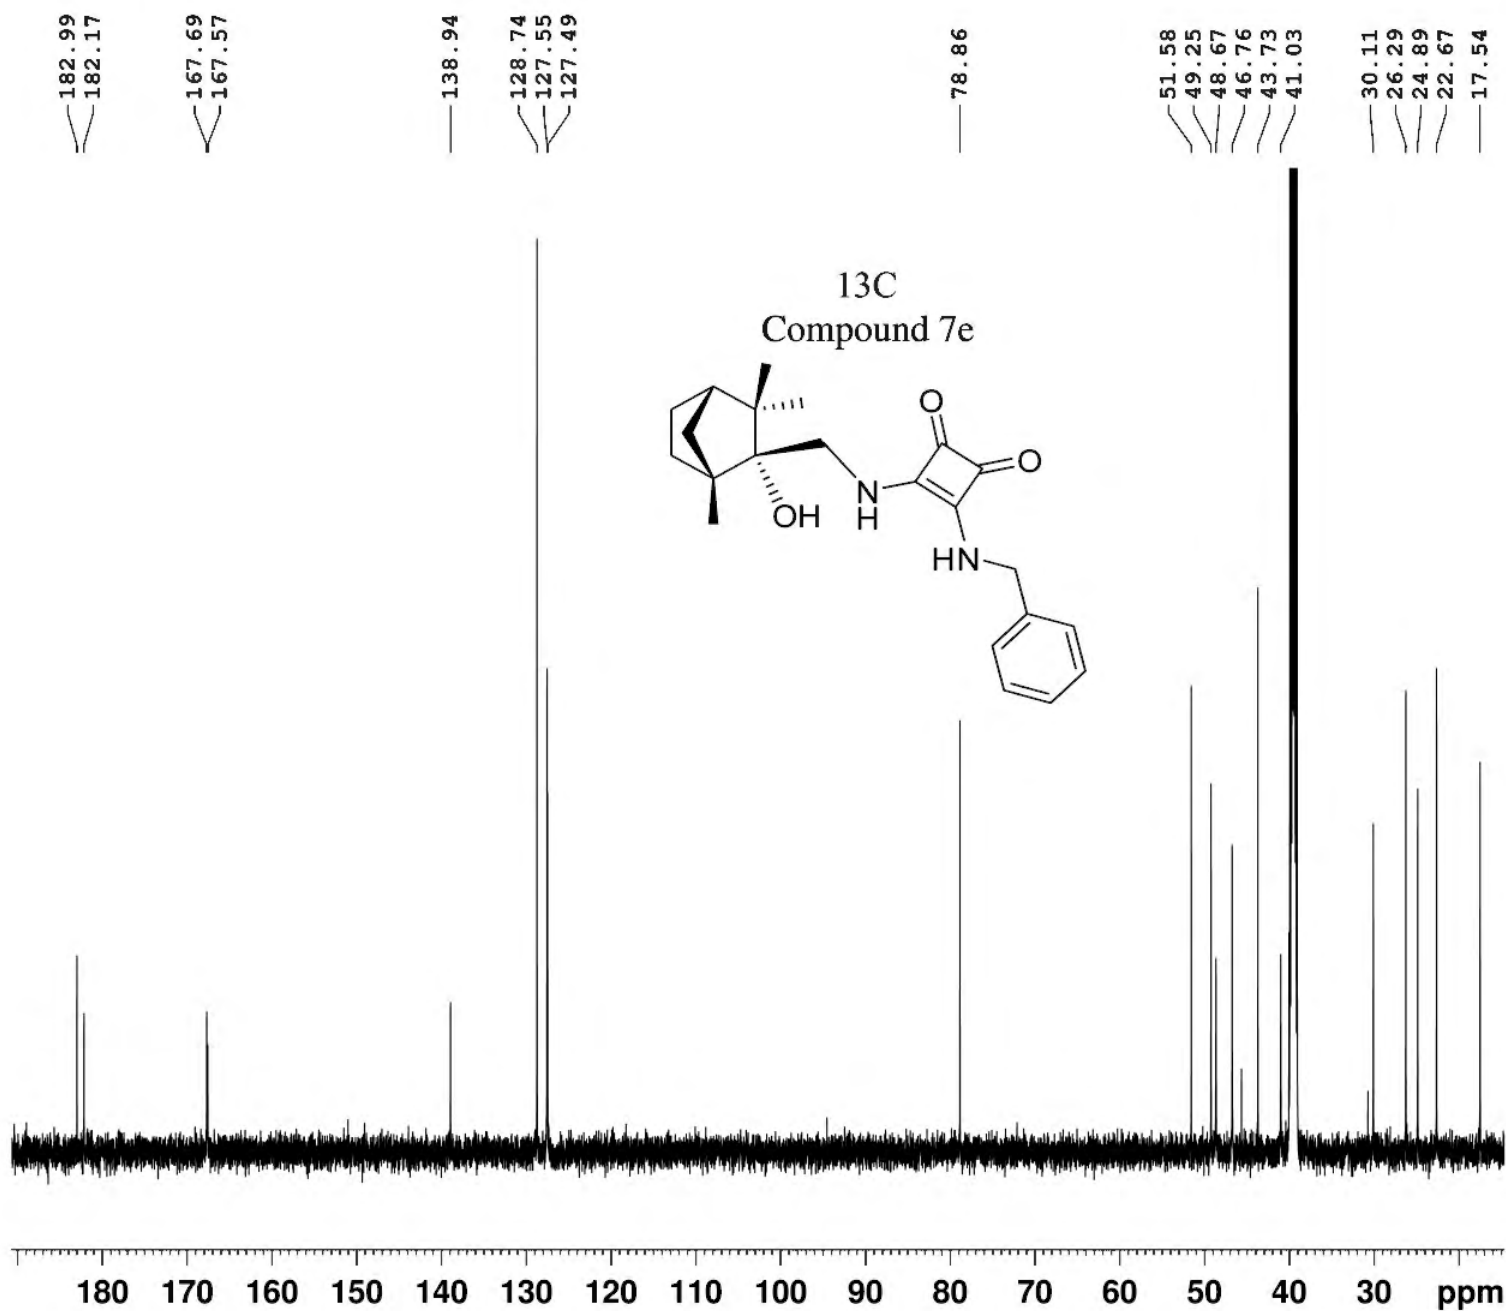

```

NAME          YNC00703A
EXPNO          12
PROCNO         1
Date_          20141121
Time           22.39
INSTRUM        spect
PROBHD         5 mm PABBO BB-
PULPROG        zgdc30
TD             32768
SOLVENT        DMSO
NS             1024
DS             0
SWH            36057.691 Hz
FIDRES         1.100393 Hz
AQ             0.4544329 sec
RG             2050
DW             13.867 usec
DE             7.68 usec
TE             293.0 K
D1             1.50000000 sec
D11            0.03000000 sec
TD0            1

===== CHANNEL f1 =====
SFO1          150.9188042 MHz
NUC1           13C
P1             9.80 usec
SI            65536
SF            150.9028750 MHz
WDW            EM
SSB            0
LB             1.00 Hz
GB             0
PC             1.00

```

7.705  
7.387  
7.363  
7.340  
7.329  
7.309  
7.285

4.716  
4.709

3.902  
3.655

2.016  
1.973  
1.772  
1.696  
1.615  
1.560  
1.518  
1.511  
1.316  
1.018  
1.016  
1.001

<sup>1</sup>H  
Compound 7f

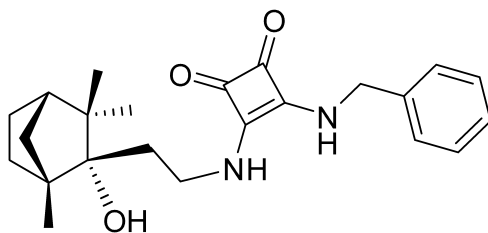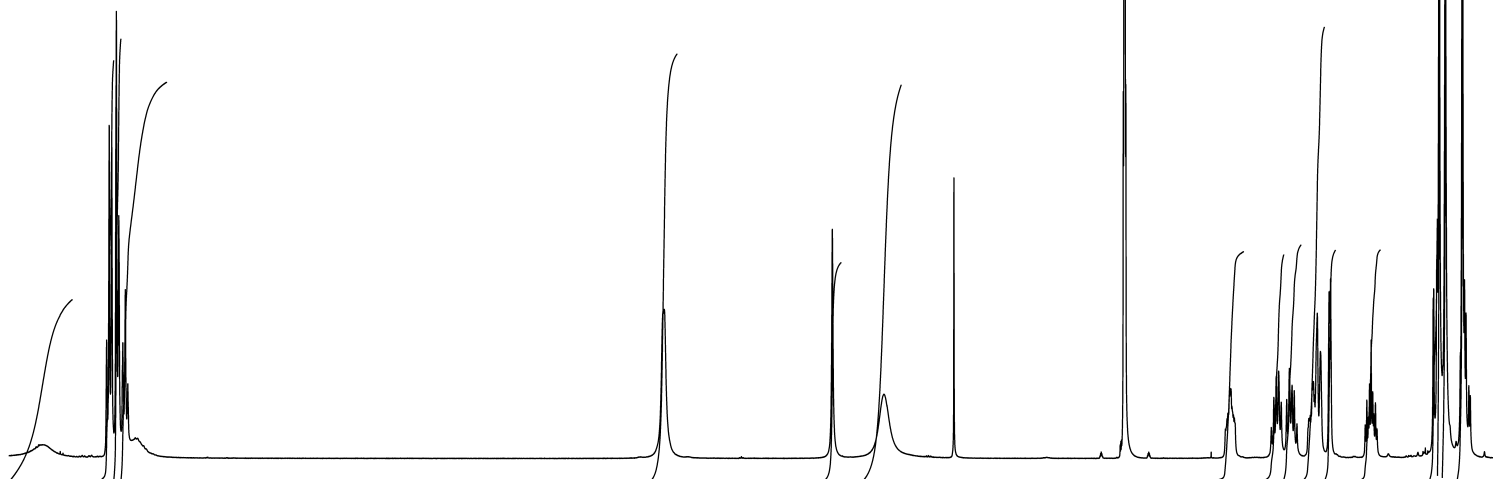

0.85  
1.97  
2.07  
1.87

2.00

1.02  
1.85

1.07  
1.06  
1.10  
2.13  
1.08  
1.08  
1.23  
2.95

NAME NB\_074\_02A  
EXPNO 11  
PROCNO 1  
Date\_ 20150511  
Time 20.33  
INSTRUM spect  
PROBHD 5 mm PABBO BB-  
PULPROG zg30  
TD 32768  
SOLVENT DMSO  
NS 32  
DS 0  
SWH 9615.385 Hz  
FIDRES 0.293438 Hz  
AQ 1.7039860 sec  
RG 144  
DW 52.000 usec  
DE 13.95 usec  
TE 298.0 K  
D1 1.00000000 sec  
TD0 1

===== CHANNEL f1 =====  
SFO1 600.1145608 MHz  
NUC1 1H  
P1 10.85 usec  
SI 65536  
SF 600.110055 MHz  
WDW EM  
SSB 0  
LB 0.00 Hz  
GB 0  
PC 1.00

7.5 7.0 6.5 6.0 5.5 5.0 4.5 4.0 3.5 3.0 2.5 2.0 1.5 ppm

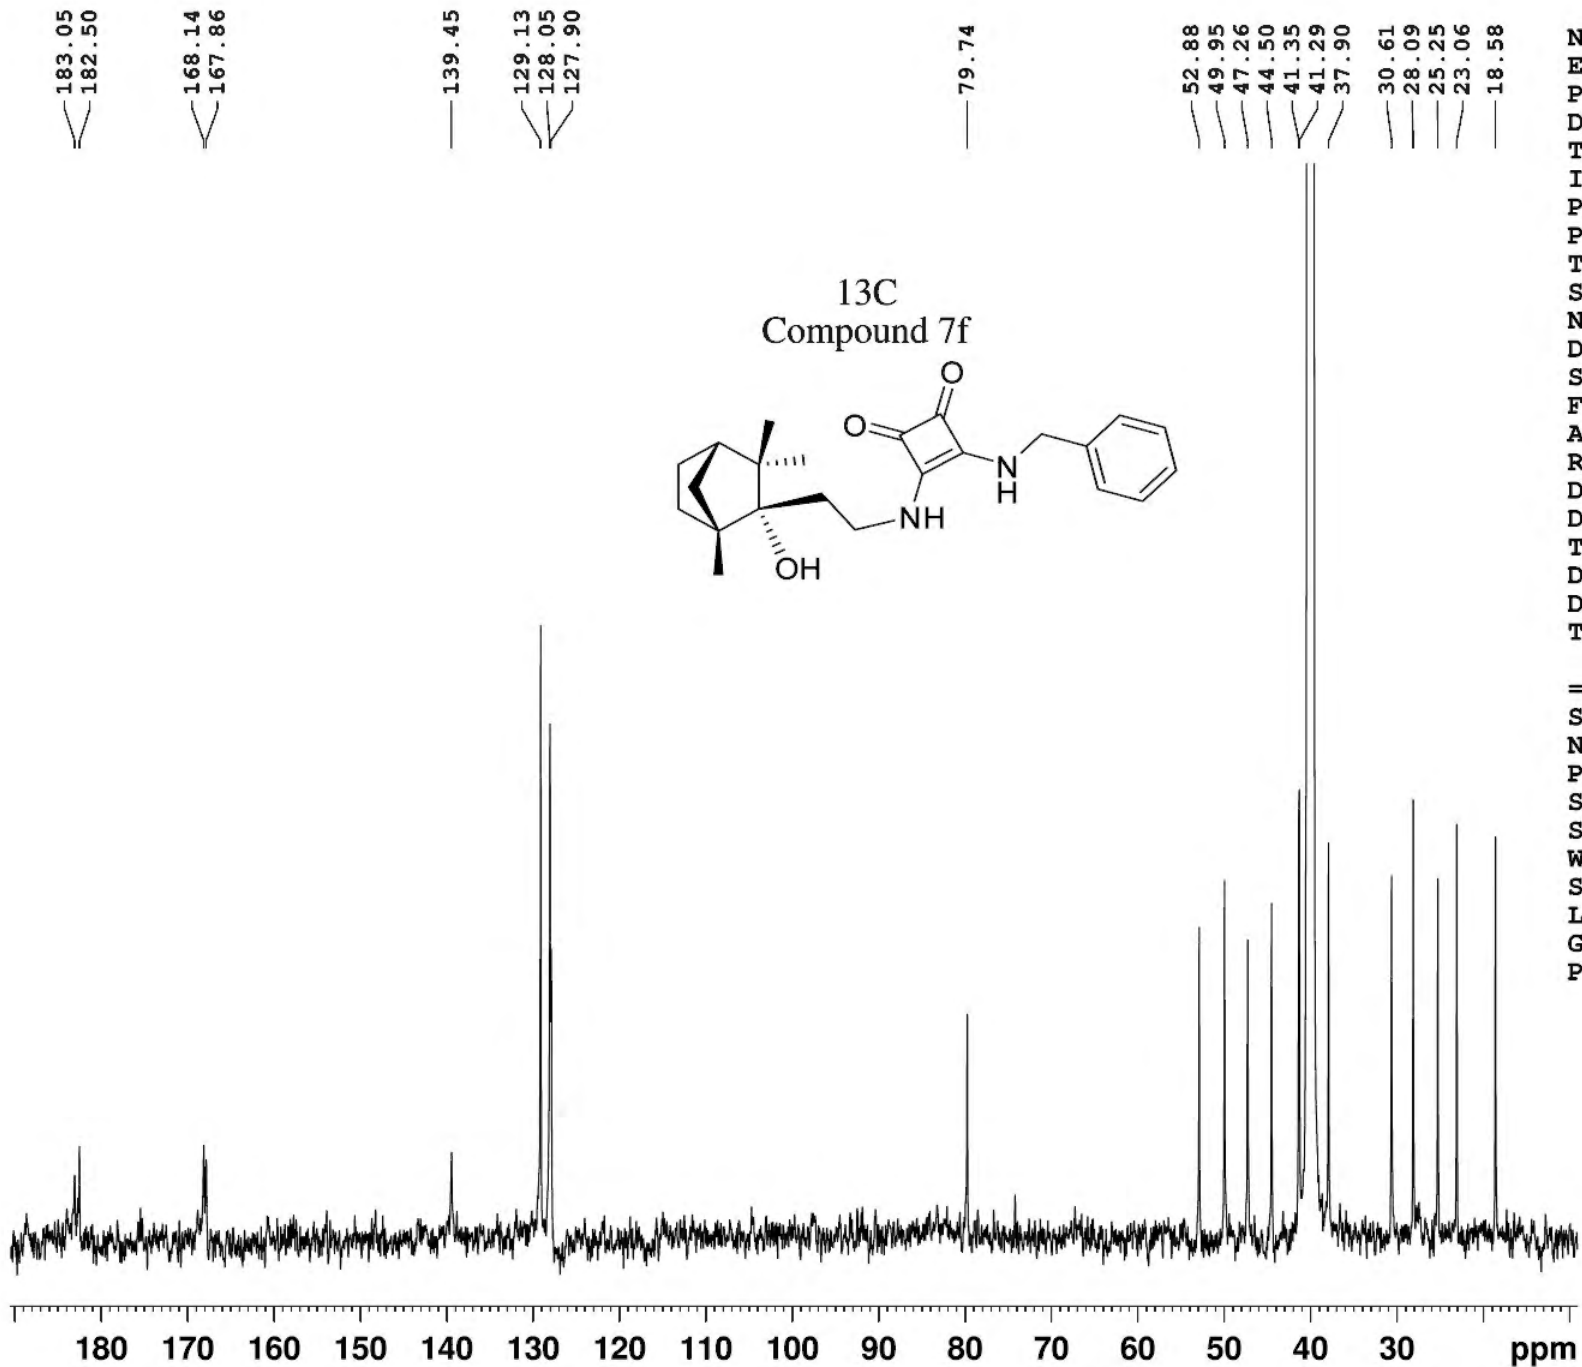

NAME NB\_074\_02BB  
 EXPNO 12  
 PROCNO 1  
 Date\_ 20150513  
 Time 22.46  
 INSTRUM spect  
 PROBHD 5 mm PABBO BB-  
 PULPROG zgdc30  
 TD 32768  
 SOLVENT DMSO  
 NS 512  
 DS 0  
 SWH 36057.691 Hz  
 FIDRES 1.100393 Hz  
 AQ 0.4544329 sec  
 RG 2050  
 DW 13.867 usec  
 DE 6.50 usec  
 TE 298.0 K  
 D1 1.50000000 sec  
 D11 0.03000000 sec  
 TD0 1

===== CHANNEL f1 =====  
 SFO1 150.9143788 MHz  
 NUC1 13C  
 P1 9.80 usec  
 SI 65536  
 SF 150.8977804 MHz  
 WDW EM  
 SSB 0  
 LB 10.00 Hz  
 GB 0  
 PC 1.40

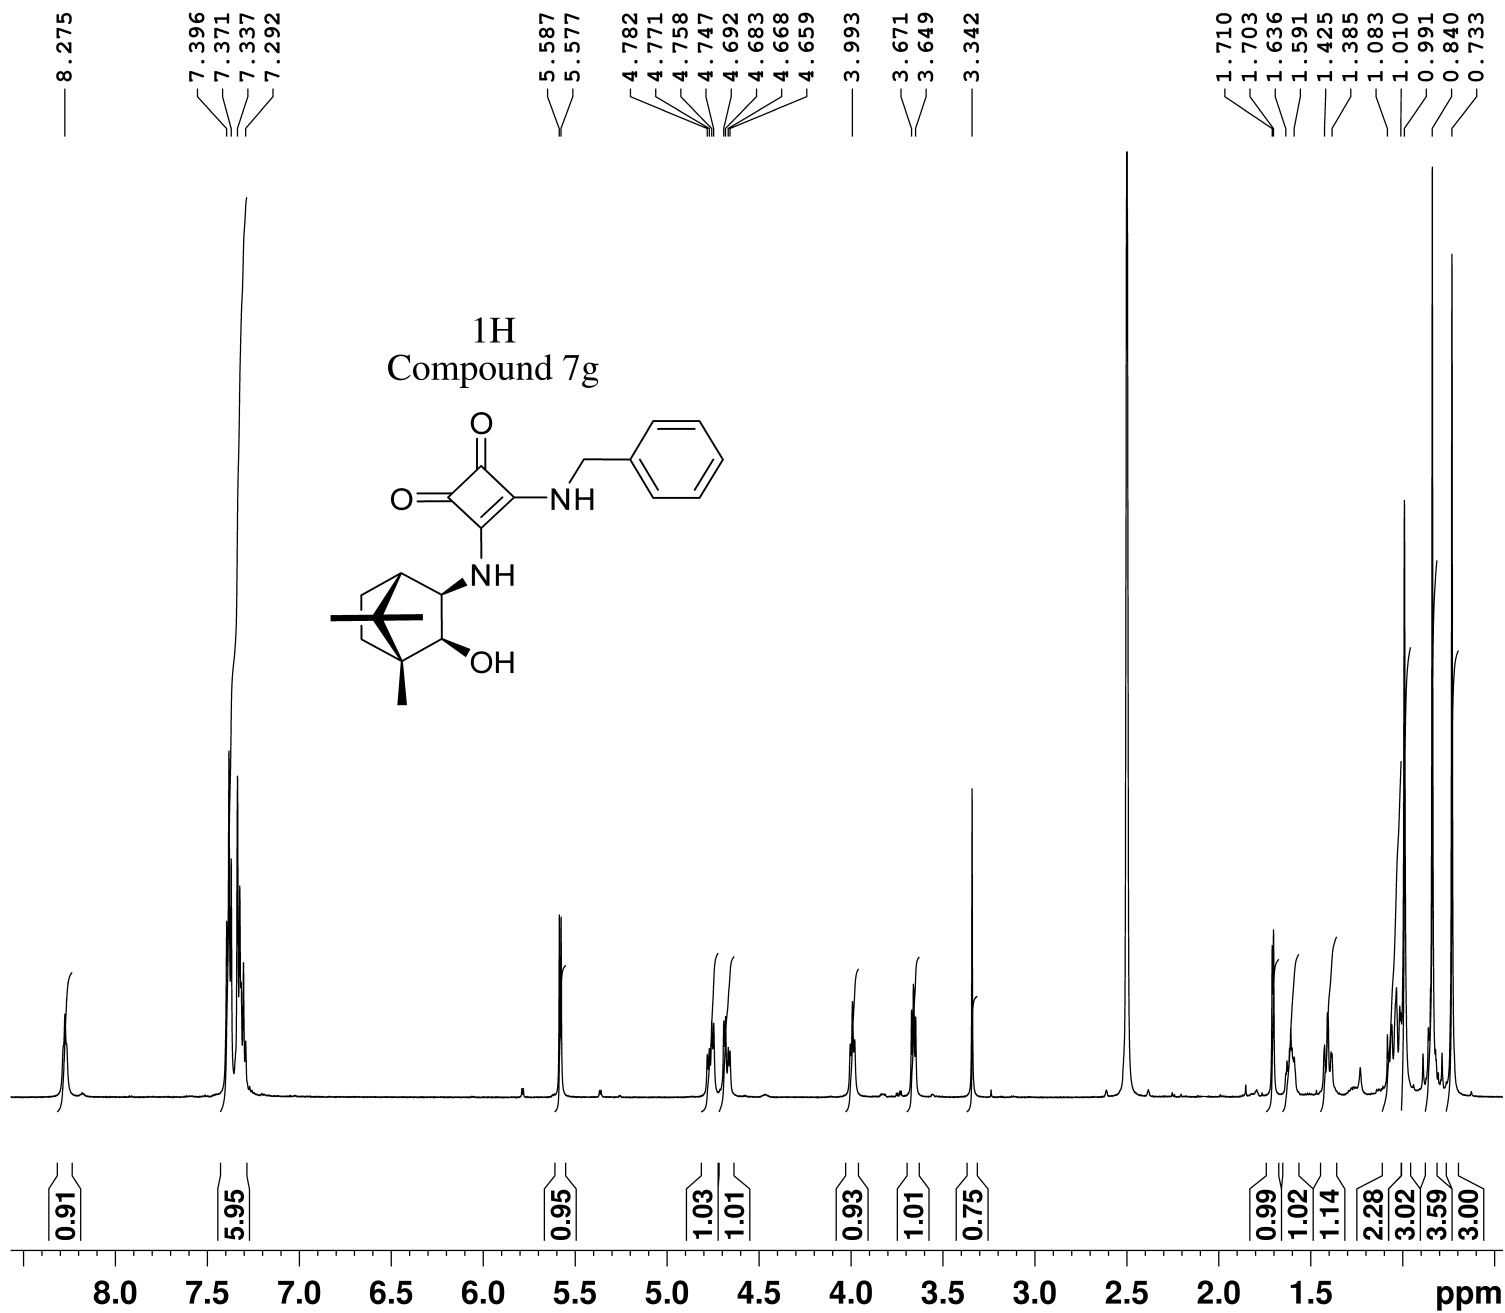

```

NAME          YNC00105B
EXPNO          11
PROCNO         1
Date_          20150721
Time           22.49
INSTRUM        spect
PROBHD         5 mm PABBO BB-
PULPROG        zg30
TD             32768
SOLVENT        DMSO
NS             16
DS             0
SWH            9615.385 Hz
FIDRES         0.293438 Hz
AQ            1.7039860 sec
RG            203
DW            52.000 usec
DE            13.95 usec
TE            293.0 K
D1            1.00000000 sec
TD0           1

===== CHANNEL f1 =====
SFO1          600.1145608 MHz
NUC1           1H
P1            10.85 usec
SI            65536
SF            600.1100048 MHz
WDW            EM
SSB            0
LB            0.00 Hz
GB            0
PC            1.00

```



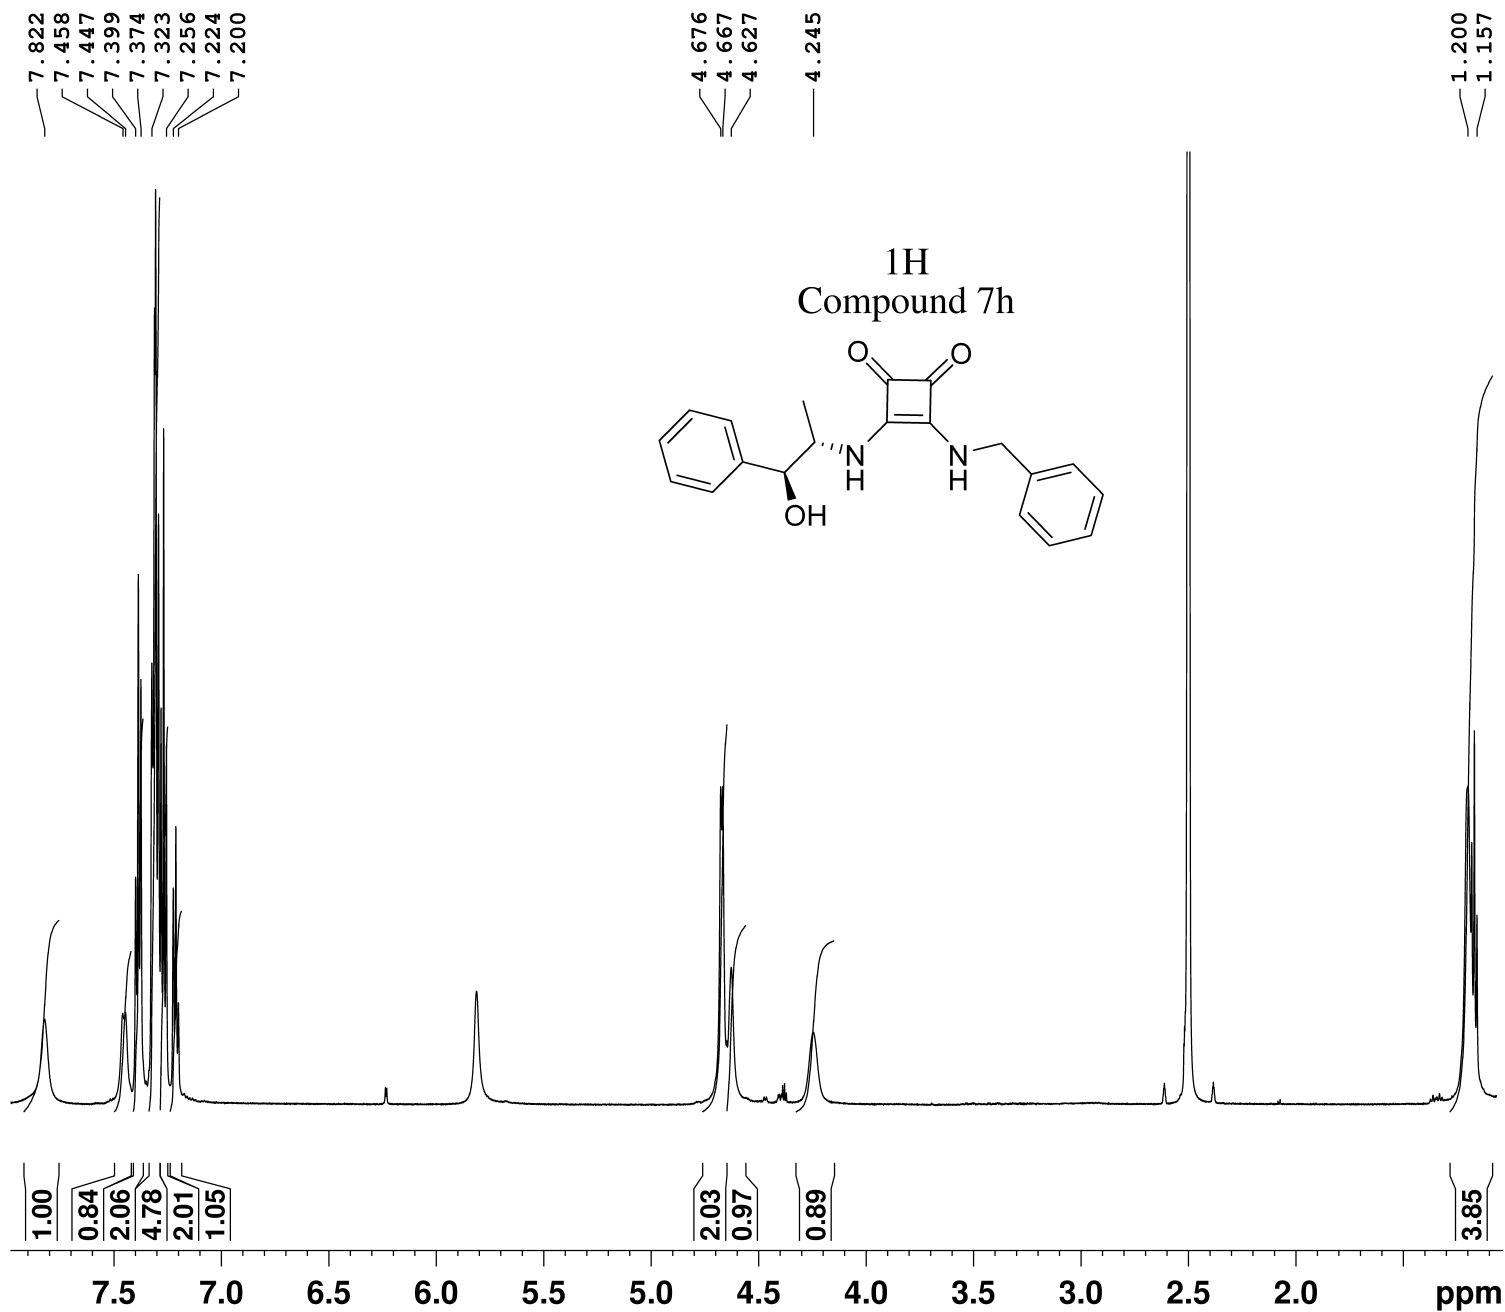

```

NAME          YNC01002
EXPNO         11
PROCNO        1
Date_         20140805
Time          23.06
INSTRUM       spect
PROBHD        5 mm PABBO BB-
PULPROG       zg30
TD            32768
SOLVENT       DMSO
NS            32
DS            0
SWH           9615.385 Hz
FIDRES        0.293438 Hz
AQ            1.7039860 sec
RG            144
DW            52.000 usec
DE            13.95 usec
TE            293.0 K
D1            1.00000000 sec
TD0           1

===== CHANNEL f1 =====
SFO1          600.1345610 MHz
NUC1           1H
P1            10.85 usec
SI            65536
SF            600.1300046 MHz
WDW           EM
SSB           0
LB            0.10 Hz
GB            0
PC            1.00

```

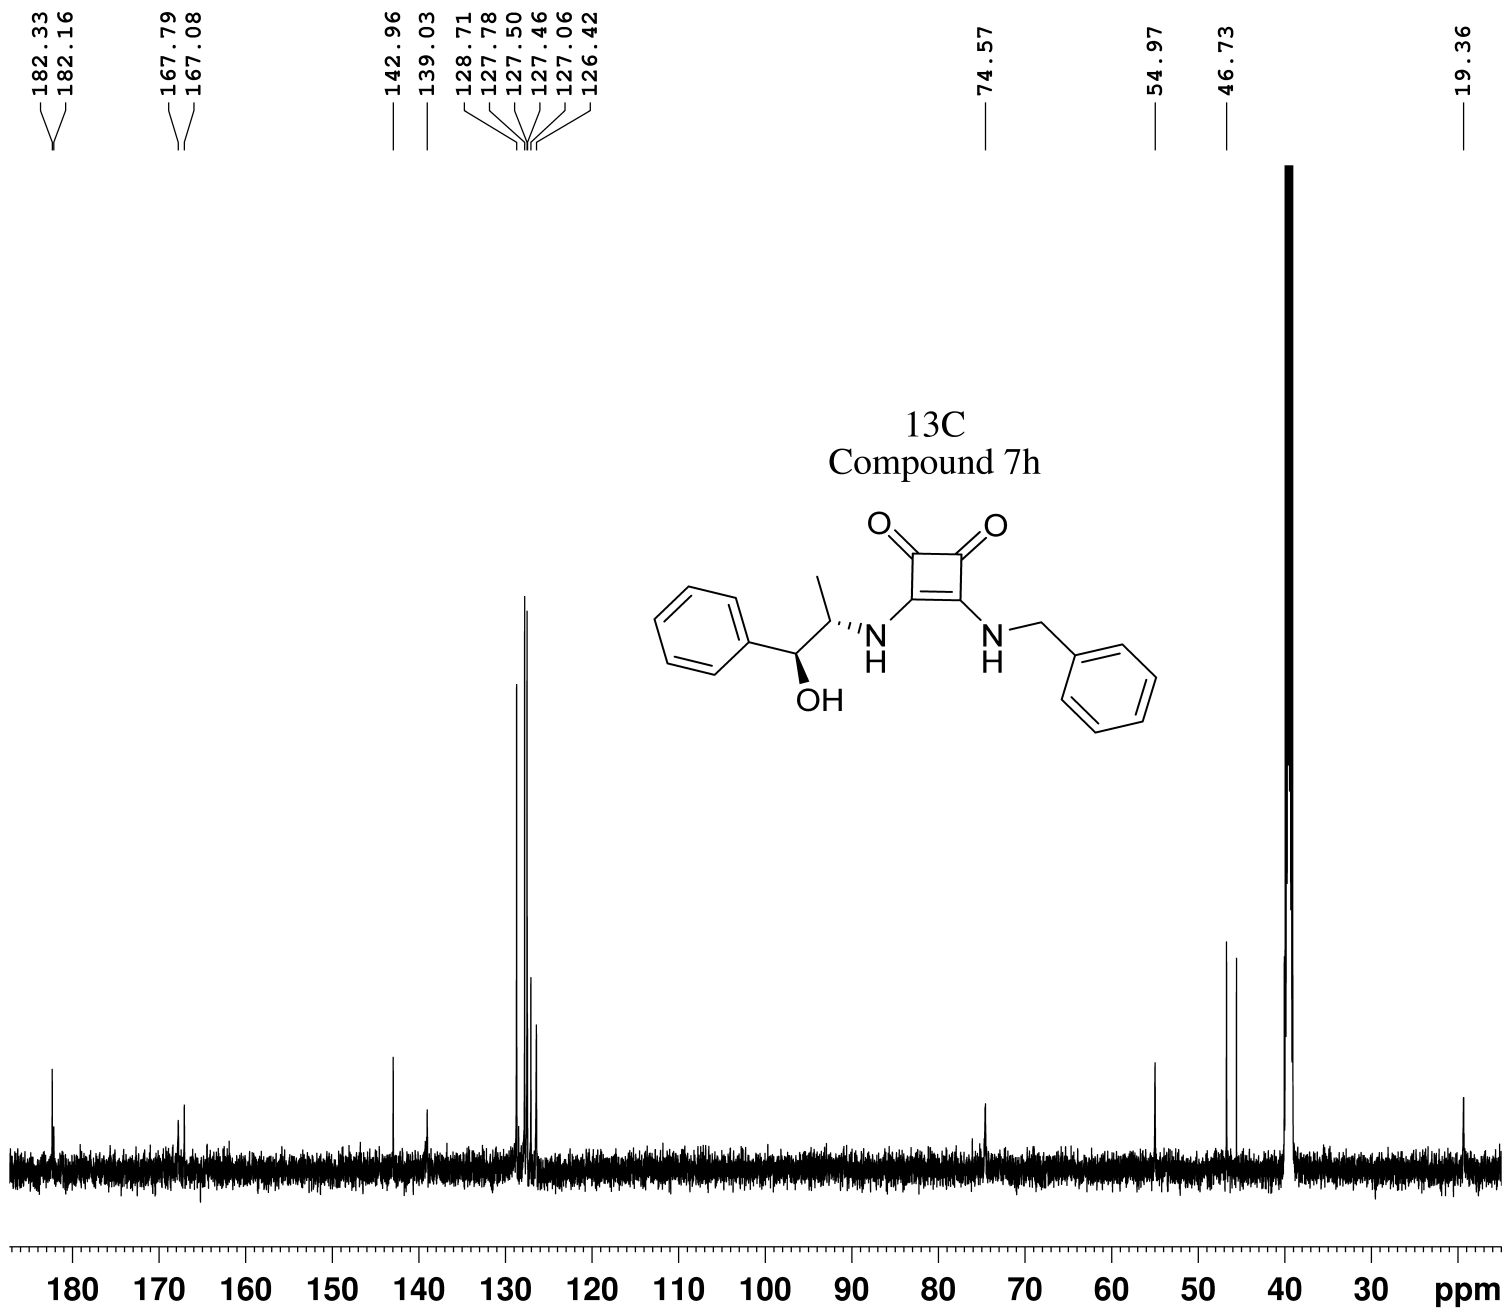

|                        |                 |
|------------------------|-----------------|
| NAME                   | YNC01002        |
| EXPNO                  | 22              |
| PROCNO                 | 1               |
| Date_                  | 20150617        |
| Time                   | 21.04           |
| INSTRUM                | spect           |
| PROBHD                 | 5 mm PABBO BB-  |
| PULPROG                | zgdc30          |
| TD                     | 32768           |
| SOLVENT                | DMSO            |
| NS                     | 1024            |
| DS                     | 0               |
| SWH                    | 36057.691 Hz    |
| FIDRES                 | 1.100393 Hz     |
| AQ                     | 0.4544329 sec   |
| RG                     | 2050            |
| DW                     | 13.867 usec     |
| DE                     | 6.50 usec       |
| TE                     | 293.0 K         |
| D1                     | 1.50000000 sec  |
| D11                    | 0.03000000 sec  |
| TD0                    | 1               |
| ===== CHANNEL f1 ===== |                 |
| SFO1                   | 150.9143788 MHz |
| NUC1                   | 13C             |
| P1                     | 9.80 usec       |
| SI                     | 65536           |
| SF                     | 150.8978451 MHz |
| WDW                    | EM              |
| SSB                    | 0               |
| LB                     | 1.00 Hz         |
| GB                     | 0               |
| PC                     | 1.00            |



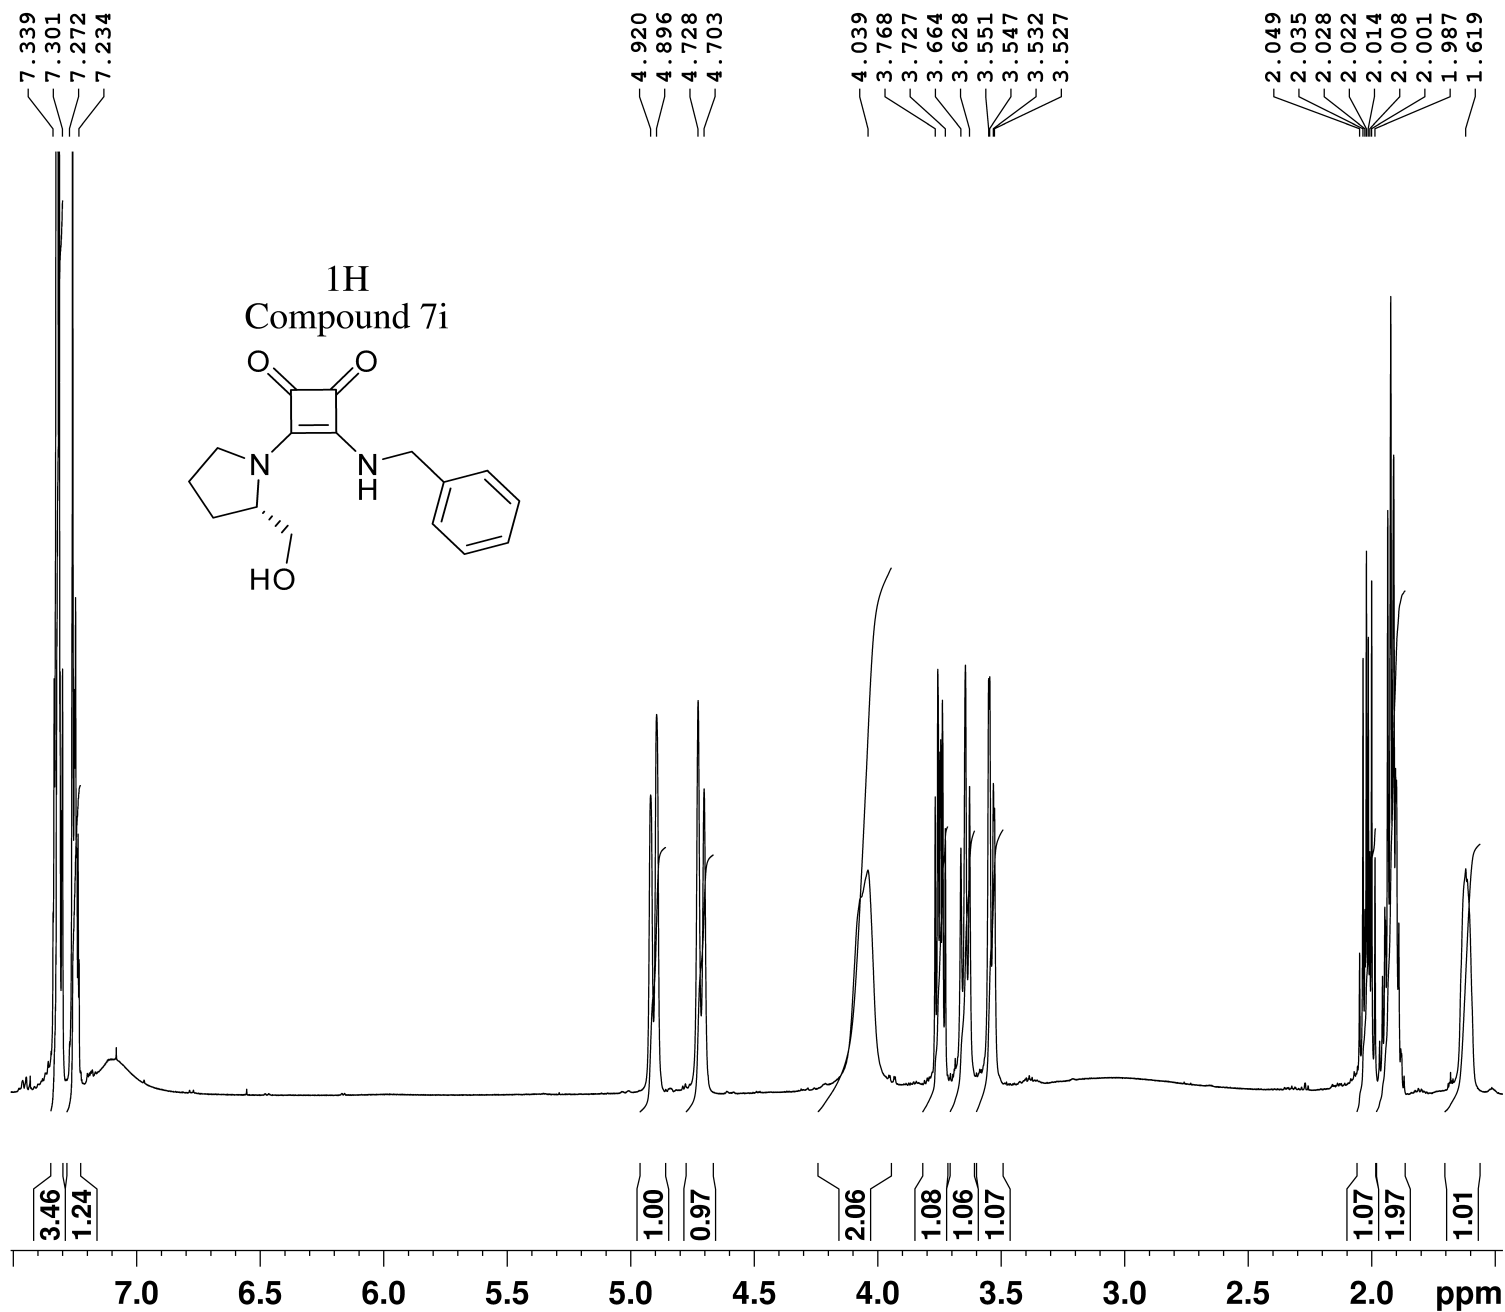

```

NAME          YNC03303B
EXPNO          11
PROCNO         1
Date_          20150621
Time           21.22
INSTRUM        spect
PROBHD         5 mm PABBO BB-
PULPROG        zg30
TD             32768
SOLVENT        CDC13
NS             512
DS             0
SWH            9615.385 Hz
FIDRES         0.293438 Hz
AQ             1.7039860 sec
RG             228
DW             52.000 usec
DE             13.95 usec
TE             323.0 K
D1             1.00000000 sec
TD0            1

===== CHANNEL f1 =====
SFO1           600.1145608 MHz
NUC1            1H
P1             10.85 usec
SI             65536
SF             600.1100136 MHz
WDW            EM
SSB            0
LB             0.00 Hz
GB             0
PC             1.00

```

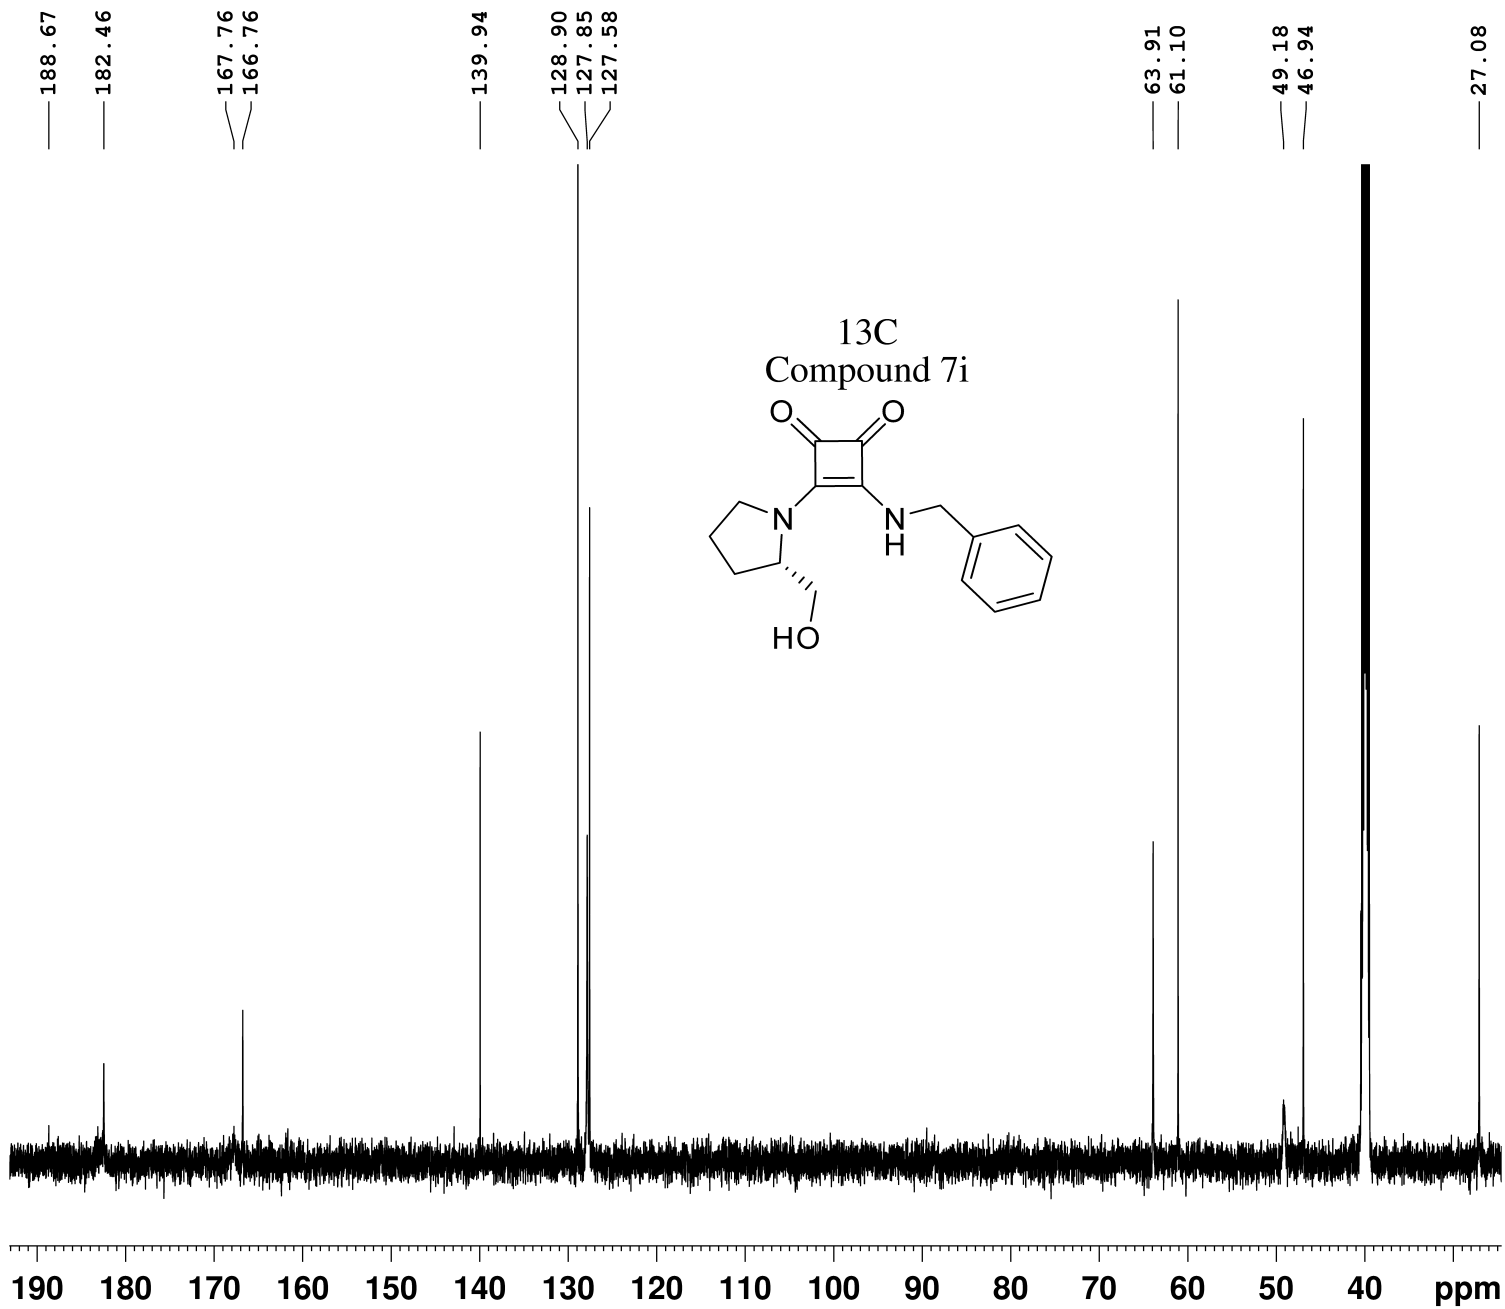

```

NAME          YNC03303A
EXPNO         12
PROCNO        1
Date_         20141121
Time          20.57
INSTRUM       spect
PROBHD        5 mm PABBO BB-
PULPROG       zgdc30
TD            32768
SOLVENT       DMSO
NS            1024
DS            0
SWH           36057.691 Hz
FIDRES        1.100393 Hz
AQ            0.4544329 sec
RG            2050
DW            13.867 usec
DE            7.68 usec
TE            293.0 K
D1            1.50000000 sec
D11           0.03000000 sec
TD0           1

```

```

===== CHANNEL f1 =====
SFO1          150.9188042 MHz
NUC1           13C
P1             9.80 usec
SI            65536
SF            150.9028150 MHz
WDW            EM
SSB            0
LB            1.00 Hz
GB            0
PC            1.00

```

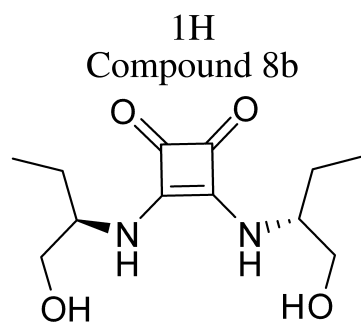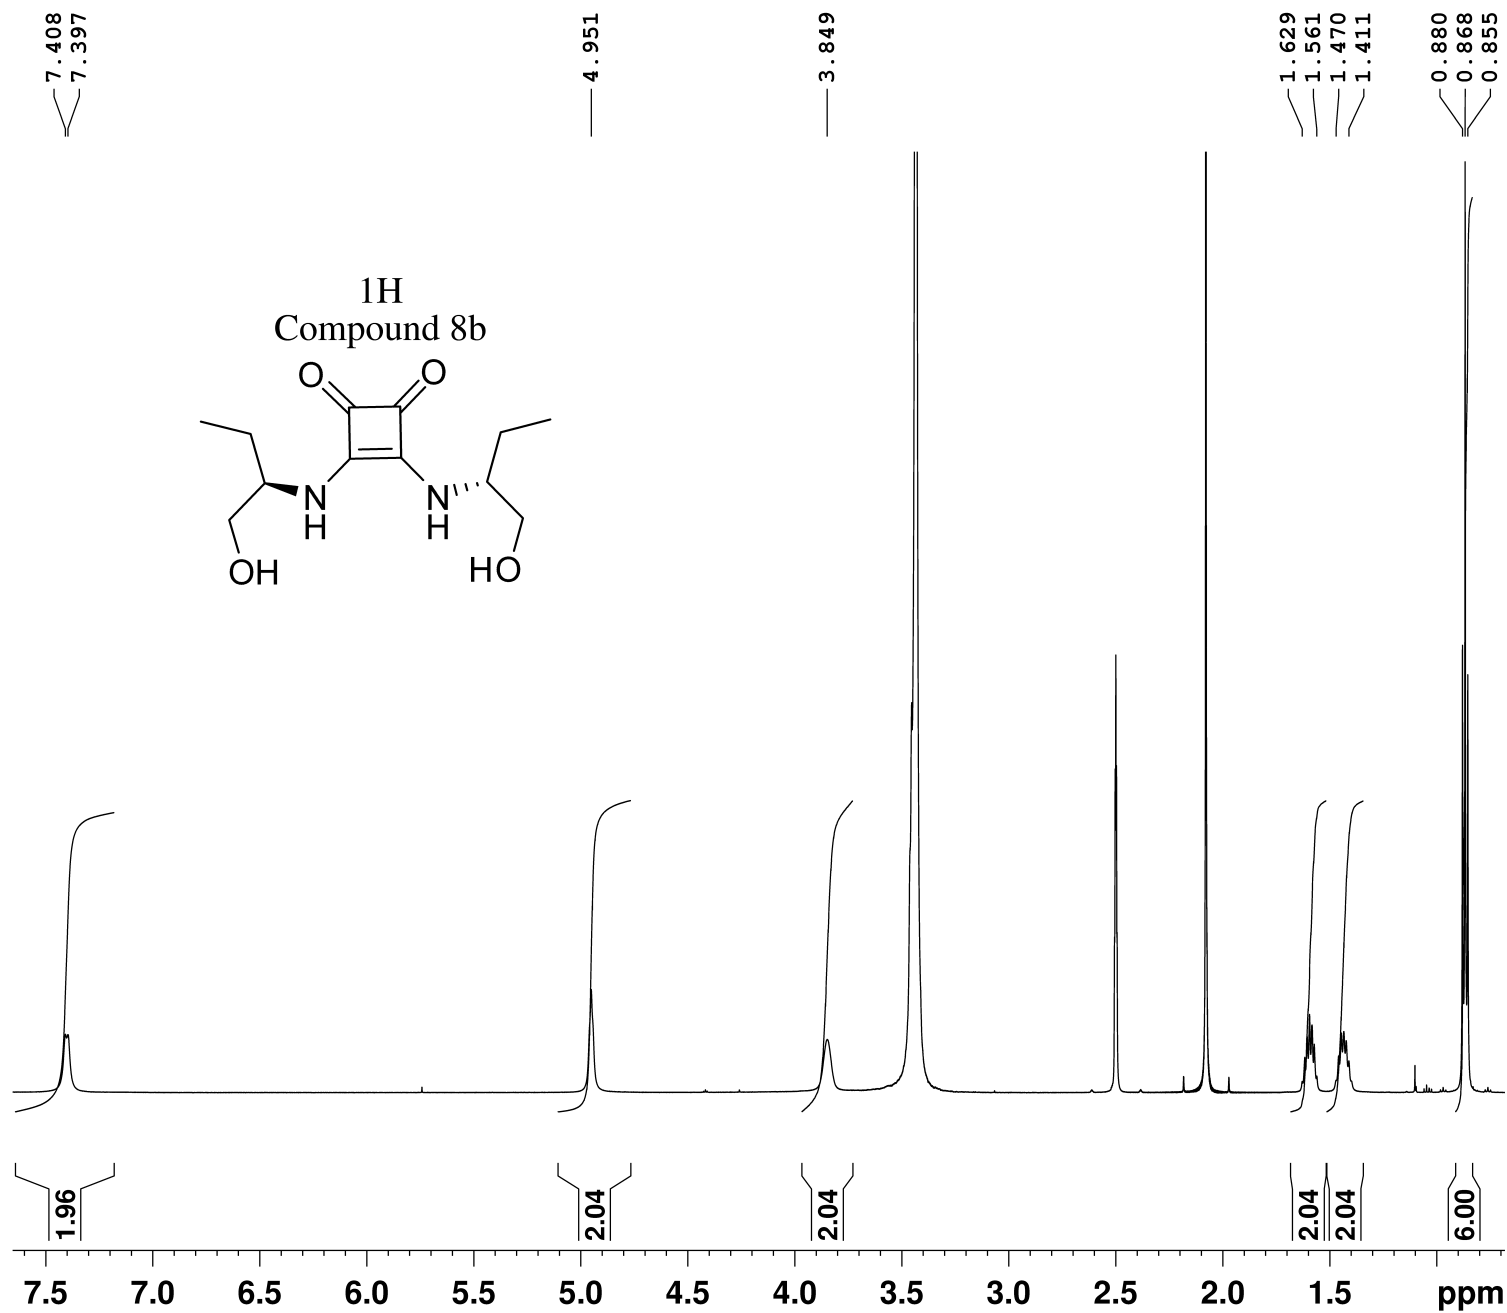

```

NAME          DL-172
EXPNO         11
PROCNO        1
Date_         20140129
Time          20.32
INSTRUM       spect
PROBHD        5 mm PABBO BB-
PULPROG       zg30
TD            32768
SOLVENT       DMSO
NS            32
DS            0
SWH           9615.385 Hz
FIDRES        0.293438 Hz
AQ            1.7039860 sec
RG            40.3
DW            52.000 usec
DE            13.95 usec
TE            293.0 K
D1            1.00000000 sec
TD0           1

===== CHANNEL f1 =====
SFO1          600.1345610 MHz
NUC1           1H
P1            10.85 usec
SI            65536
SF            600.1300075 MHz
WDW           EM
SSB           0
LB            0.10 Hz
GB            0
PC            1.00

```

— 182.12

— 167.87

— 63.29

— 56.88

— 25.04

— 10.32

<sup>13</sup>C  
Compound 8b

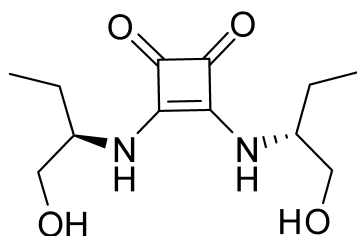

```

NAME          DL-172
EXPNO          12
PROCNO         1
Date_          20140129
Time           21.06
INSTRUM        spect
PROBHD         5 mm PABBO BB-
PULPROG        zgdc30
TD             32768
SOLVENT        DMSO
NS             1024
DS             0
SWH            36057.691 Hz
FIDRES         1.100393 Hz
AQ             0.4544329 sec
RG             2050
DW             13.867 usec
DE             7.48 usec
TE             293.0 K
D1             1.50000000 sec
D11            0.03000000 sec
TD0            1
  
```

```

===== CHANNEL f1 =====
SFO1          150.9188042 MHz
NUC1           13C
P1             10.75 usec
SI            65536
SF            150.9028611 MHz
WDW            EM
SSB            0
LB             1.00 Hz
GB            0
PC             1.00
  
```

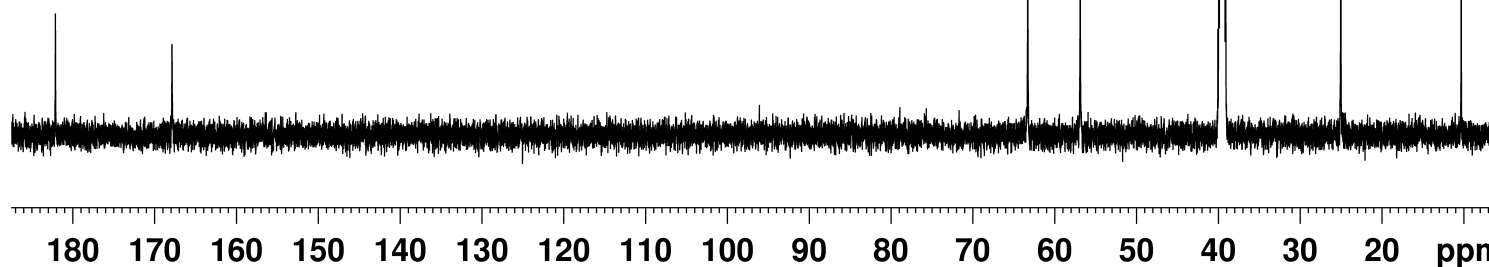

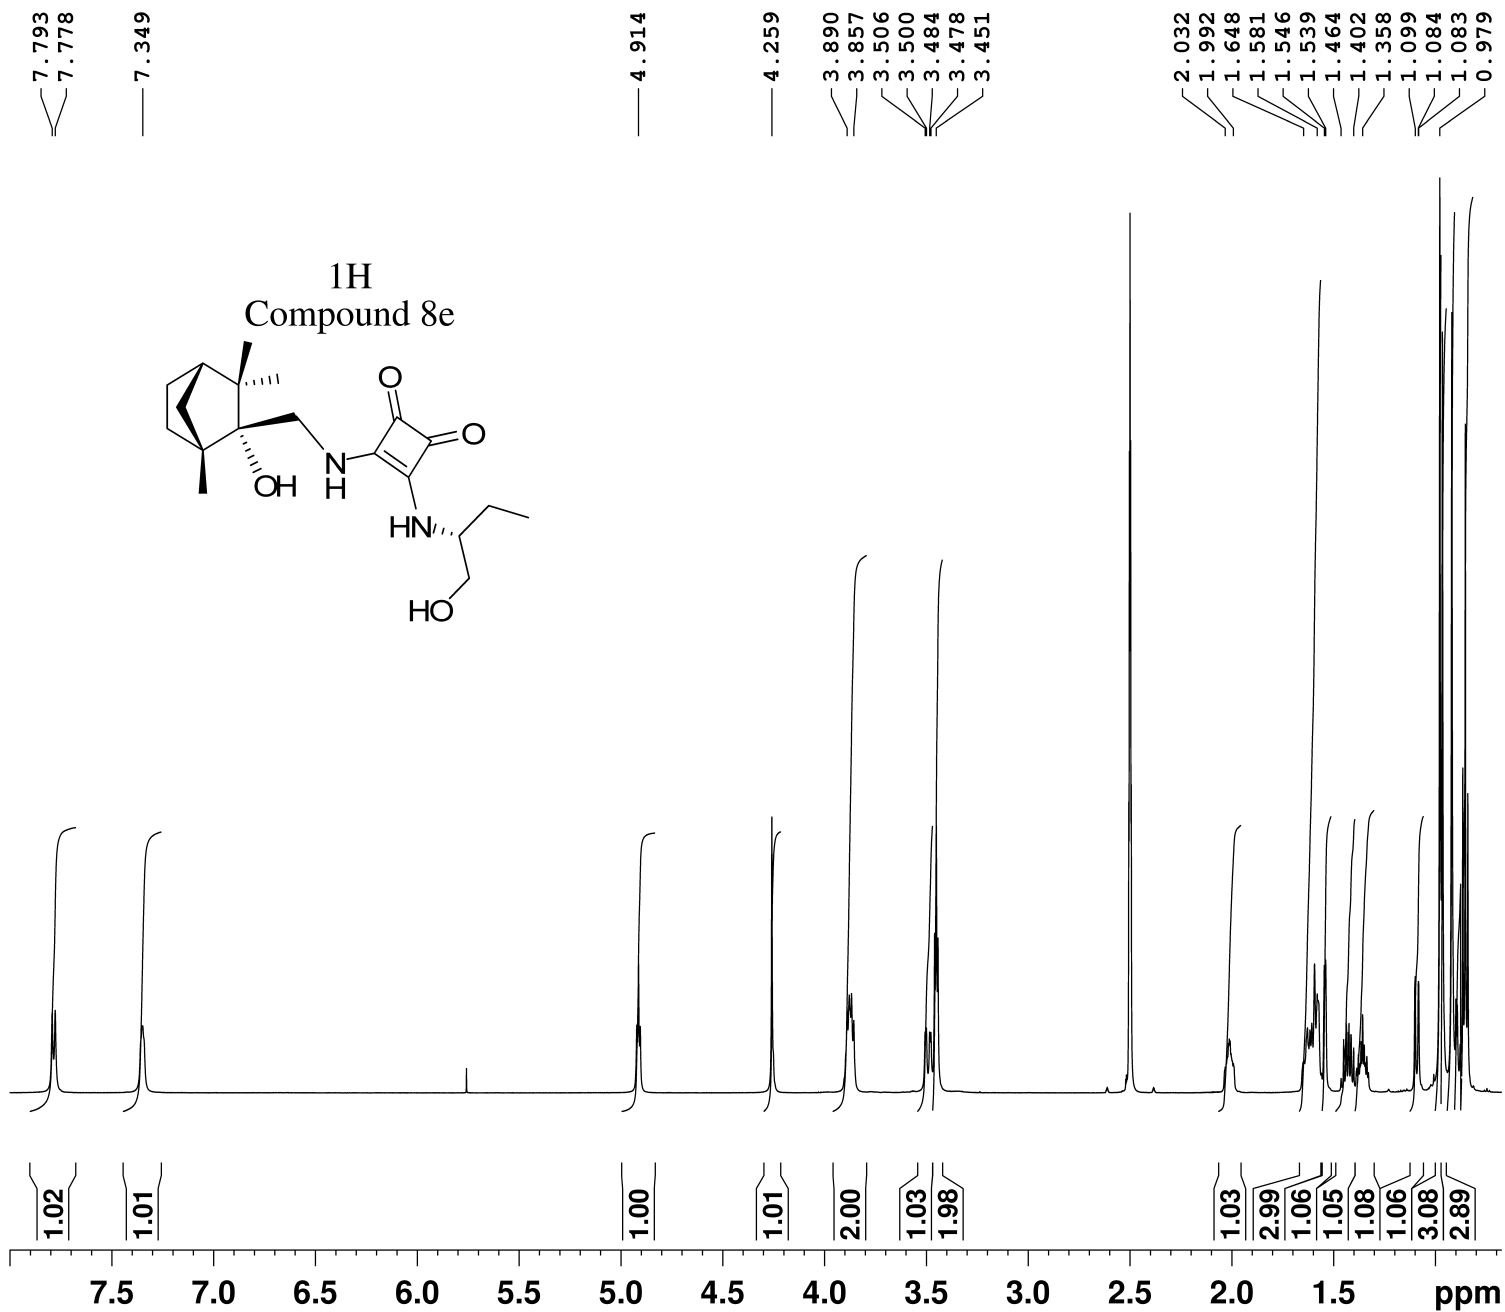

```

NAME          YNC04603A
EXPNO         11
PROCNO        1
Date_         20141209
Time          3.51
INSTRUM       spect
PROBHD        5 mm PABBO BB-
PULPROG       zg30
TD            32768
SOLVENT       DMSO
NS            32
DS            0
SWH           9615.385 Hz
FIDRES        0.293438 Hz
AQ            1.7039860 sec
RG            144
DW            52.000 usec
DE            13.95 usec
TE            293.0 K
D1            1.00000000 sec
TD0           1

===== CHANNEL f1 =====
SFO1          600.1345610 MHz
NUC1           1H
P1            10.85 usec
SI            65536
SF            600.1300059 MHz
WDW           EM
SSB           0
LB            0.10 Hz
GB            0
PC            1.00

```

182.74  
181.94

168.12  
167.46

78.87

63.32

56.61

51.59

49.29

48.67

43.74

41.05

30.12

26.31

24.98

24.91

22.68

17.56

10.17

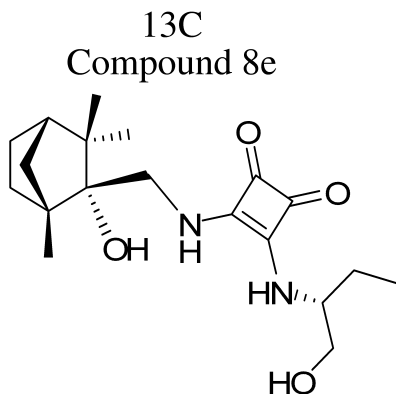

NAME YNC04603A  
EXPNO 12  
PROCNO 1  
Date\_ 20141209  
Time 4.25  
INSTRUM spect  
PROBHD 5 mm PABBO BB-  
PULPROG zgdc30  
TD 32768  
SOLVENT DMSO  
NS 1024  
DS 0  
SWH 36057.691 Hz  
FIDRES 1.100393 Hz  
AQ 0.4544329 sec  
RG 2050  
DW 13.867 usec  
DE 7.68 usec  
TE 293.0 K  
D1 1.5000000 sec  
D11 0.0300000 sec  
TD0 1

===== CHANNEL f1 =====  
SFO1 150.9188042 MHz  
NUC1 13C  
P1 9.80 usec  
SI 65536  
SF 150.9028749 MHz  
WDW EM  
SSB 0  
LB 1.00 Hz  
GB 0  
PC 1.00

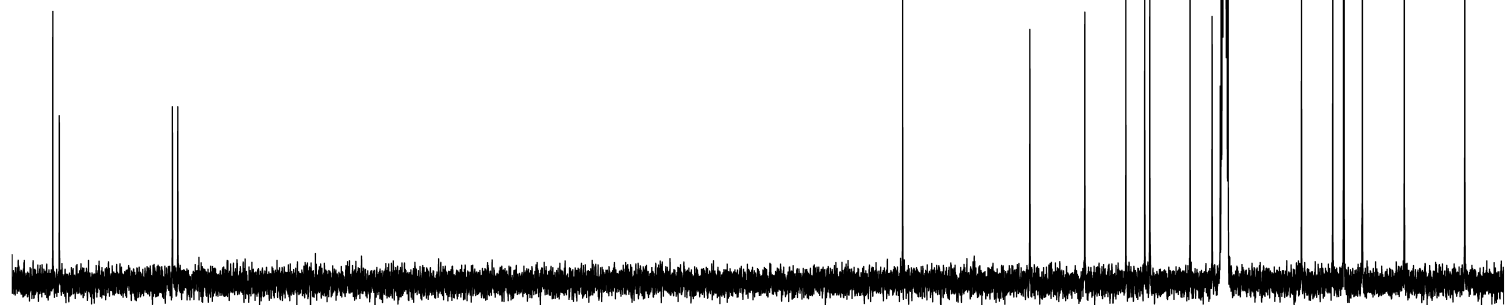

180 170 160 150 140 130 120 110 100 90 80 70 60 50 40 30 20 ppm

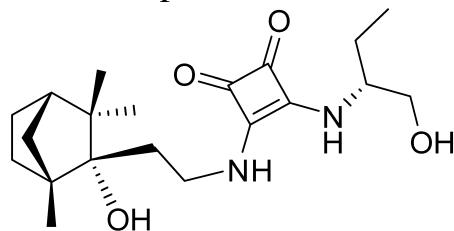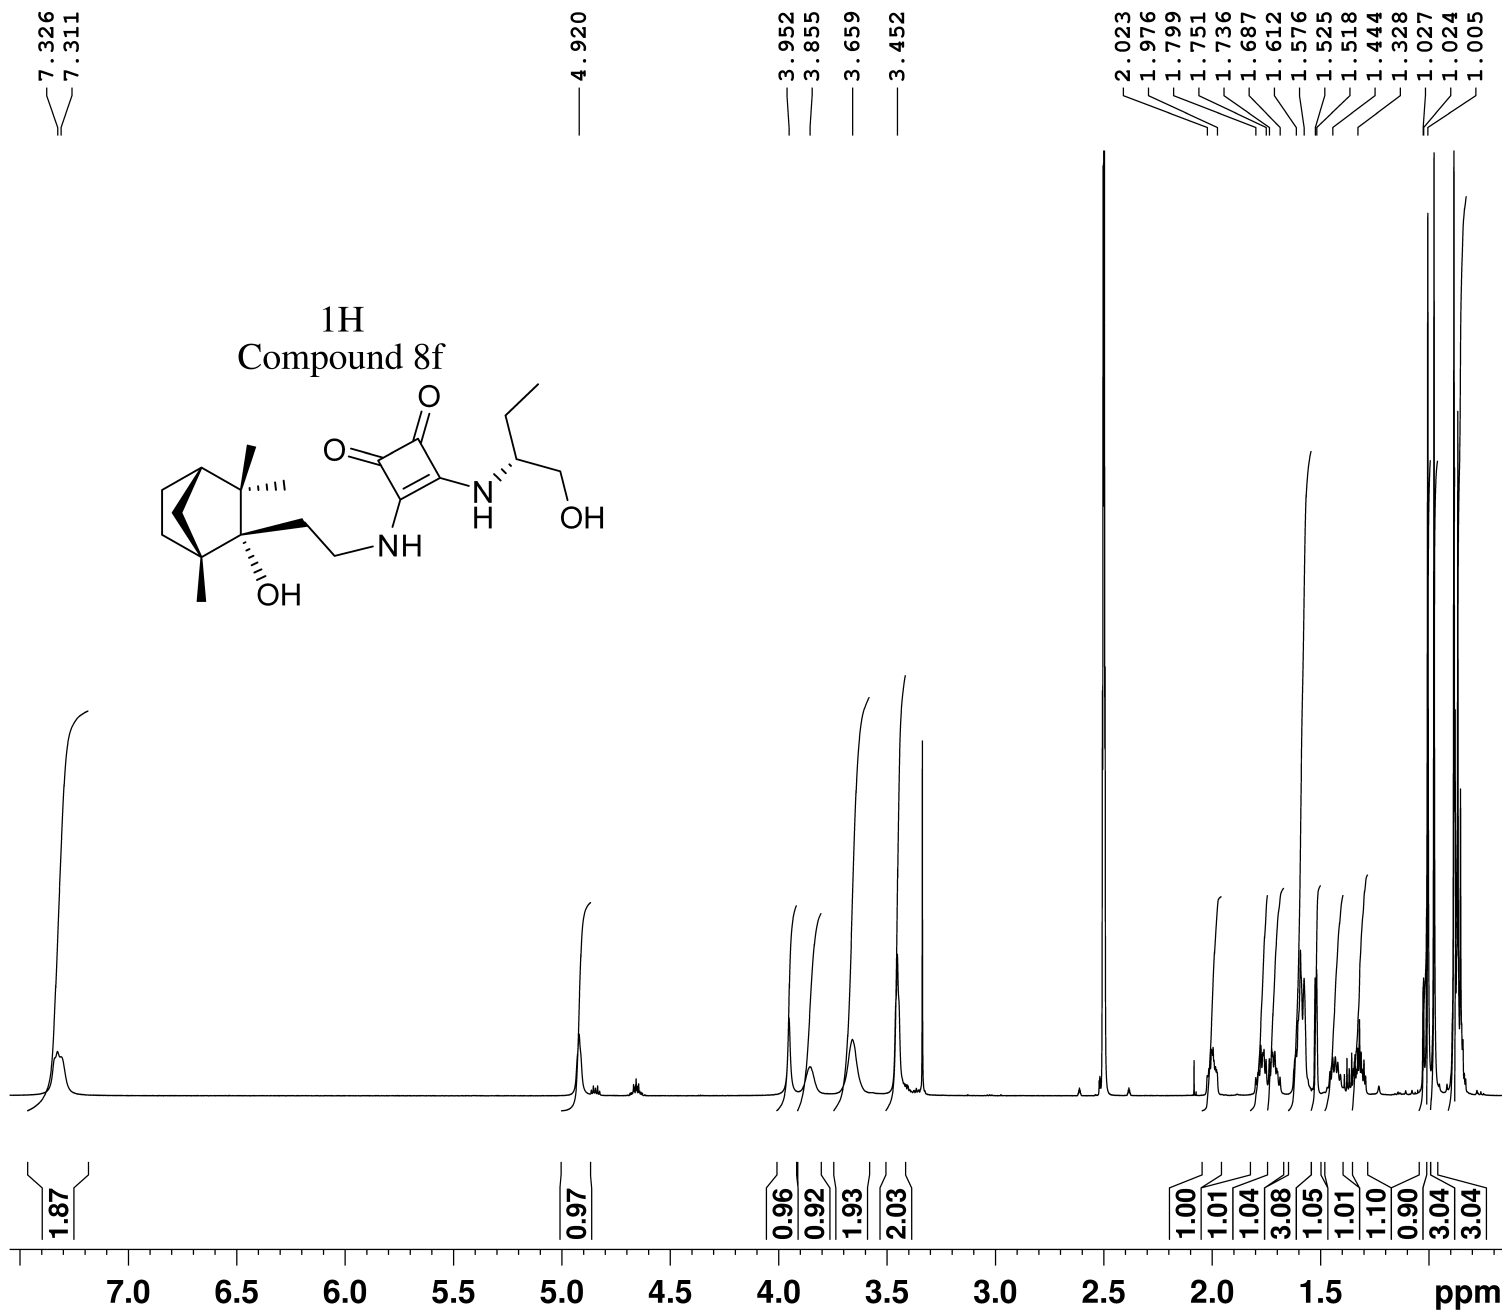

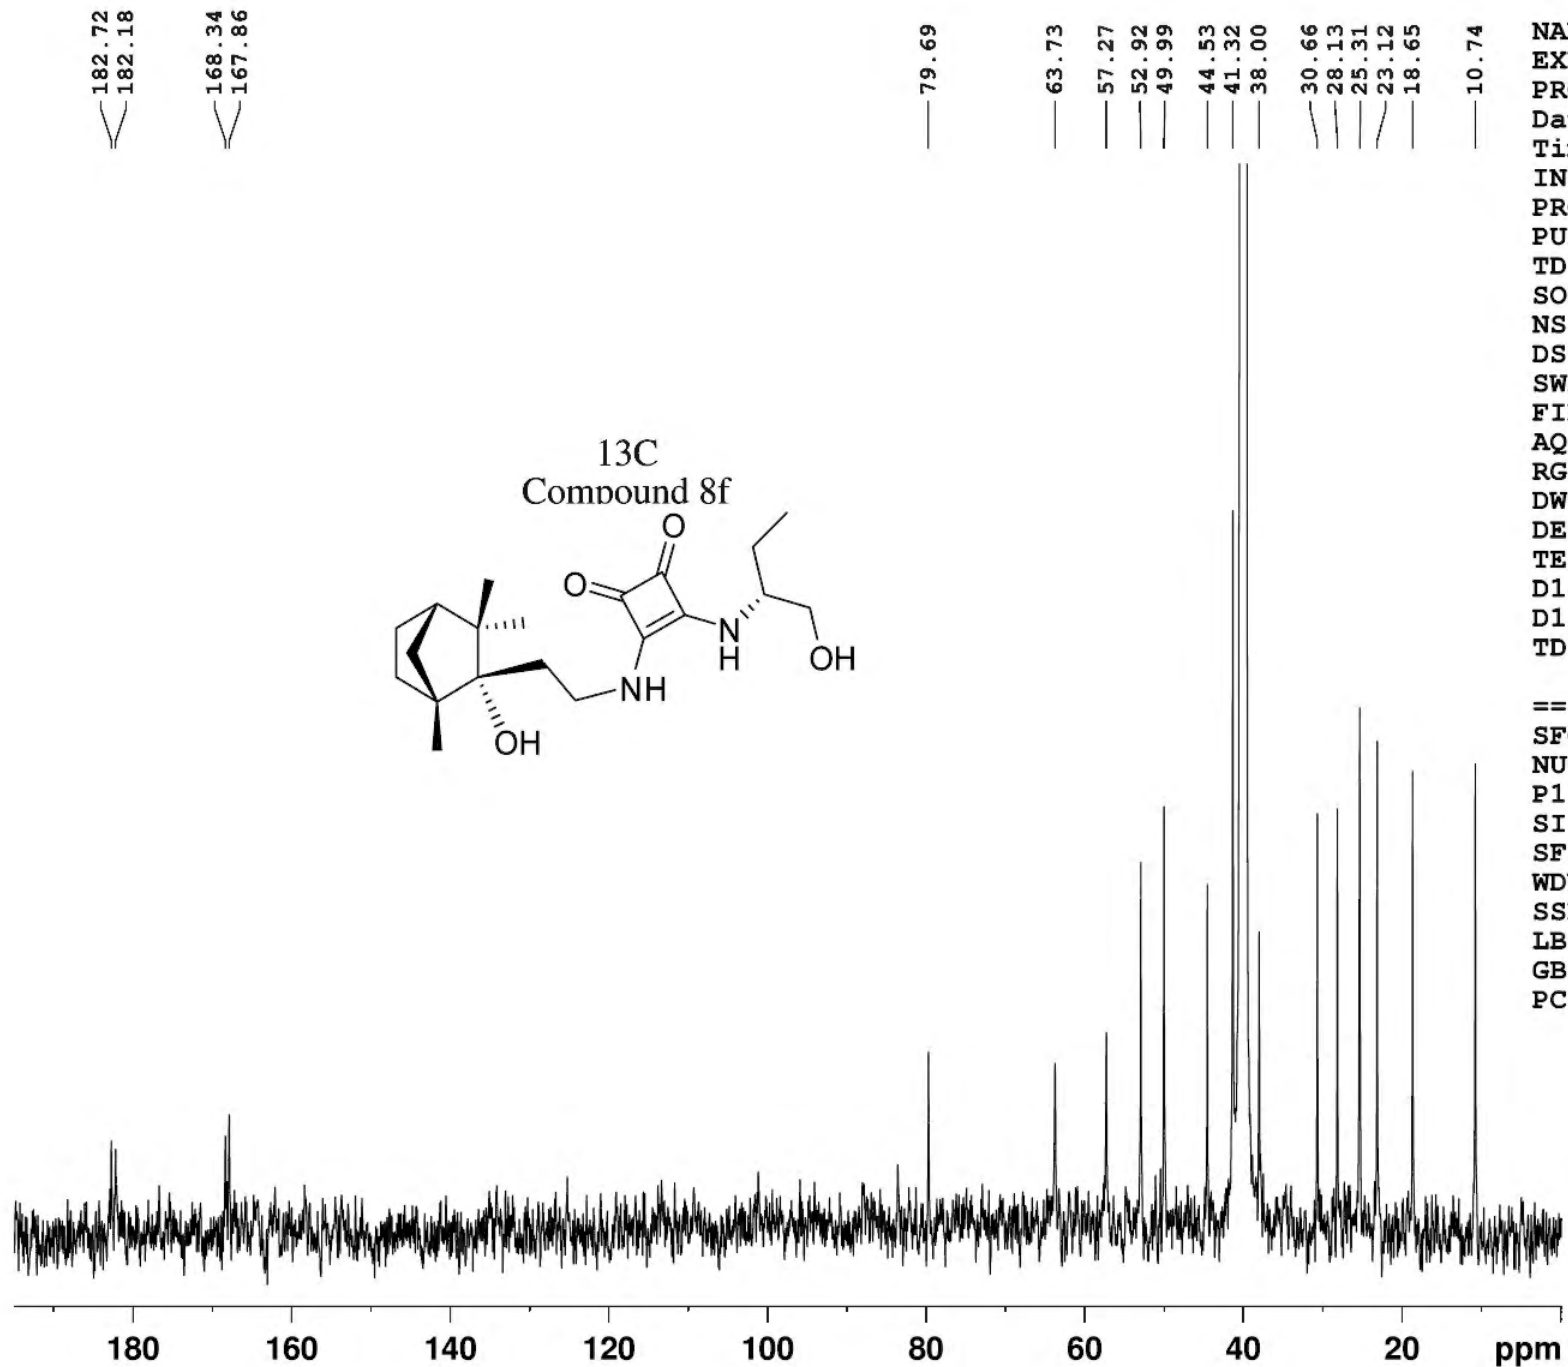

|         |                |     |
|---------|----------------|-----|
| NAME    | NB-82A         |     |
| EXPNO   | 12             |     |
| PROCNO  | 1              |     |
| Date_   | 20140703       |     |
| Time    | 18.02          |     |
| INSTRUM | spect          |     |
| PROBHD  | 5 mm PABBO BB- |     |
| PULPROG | zgdc30         |     |
| TD      | 32768          |     |
| SOLVENT | DMSO           |     |
| NS      | 512            |     |
| DS      | 0              |     |
| SWH     | 36057.691      | Hz  |
| FIDRES  | 1.100393       | Hz  |
| AQ      | 0.4544329      | sec |
| RG      | 2050           |     |
| DW      | 13.867         | use |
| DE      | 7.48           | use |
| TE      | 293.0          | K   |
| D1      | 1.50000000     | sec |
| D11     | 0.03000000     | sec |
| TD0     | 1              |     |

  

|                        |             |     |
|------------------------|-------------|-----|
| ===== CHANNEL f1 ===== |             |     |
| SFO1                   | 150.9188042 | MHz |
| NUC1                   | 13C         |     |
| P1                     | 10.75       | use |
| SI                     | 65536       |     |
| SF                     | 150.9028032 | MHz |
| WDW                    | EM          |     |
| SSB                    | 0           |     |
| LB                     | 10.00       | Hz  |
| GB                     | 0           |     |
| PC                     | 1.00        |     |



<sup>1</sup>H  
Compound 9b

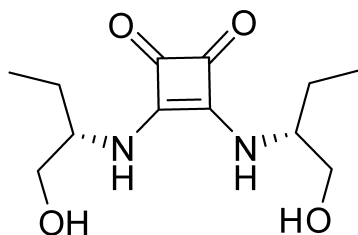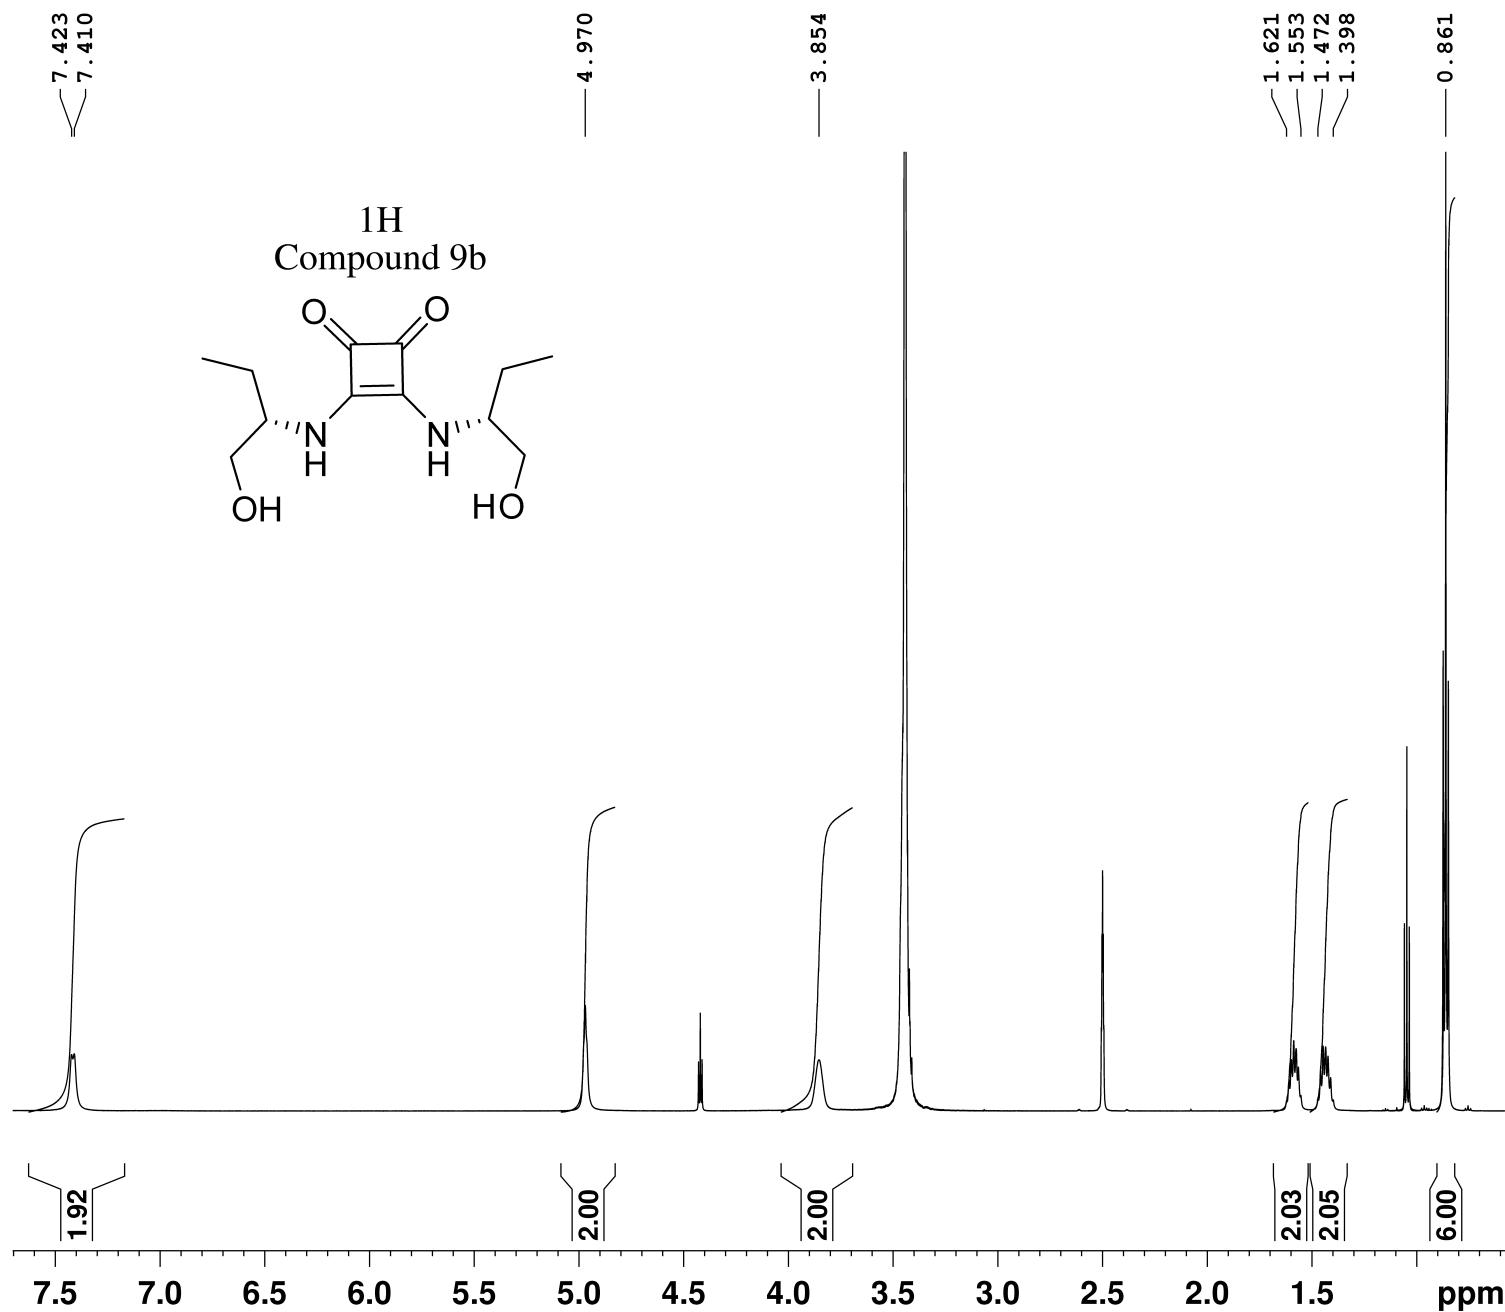

```

NAME          DL-176
EXPNO         11
PROCNO        1
Date_         20140212
Time          17.14
INSTRUM       spect
PROBHD        5 mm PABBO BB-
PULPROG       zg30
TD            32768
SOLVENT       DMSO
NS            16
DS            0
SWH           9615.385 Hz
FIDRES        0.293438 Hz
AQ            1.7039860 sec
RG            36
DW            52.000 usec
DE            13.95 usec
TE            293.0 K
D1            1.00000000 sec
TD0           1
  
```

```

===== CHANNEL f1 =====
SFO1          600.1345610 MHz
NUC1           1H
P1             10.85 usec
SI             65536
SF             600.1300077 MHz
WDW            EM
SSB            0
LB             0.10 Hz
GB             0
PC             1.00
  
```

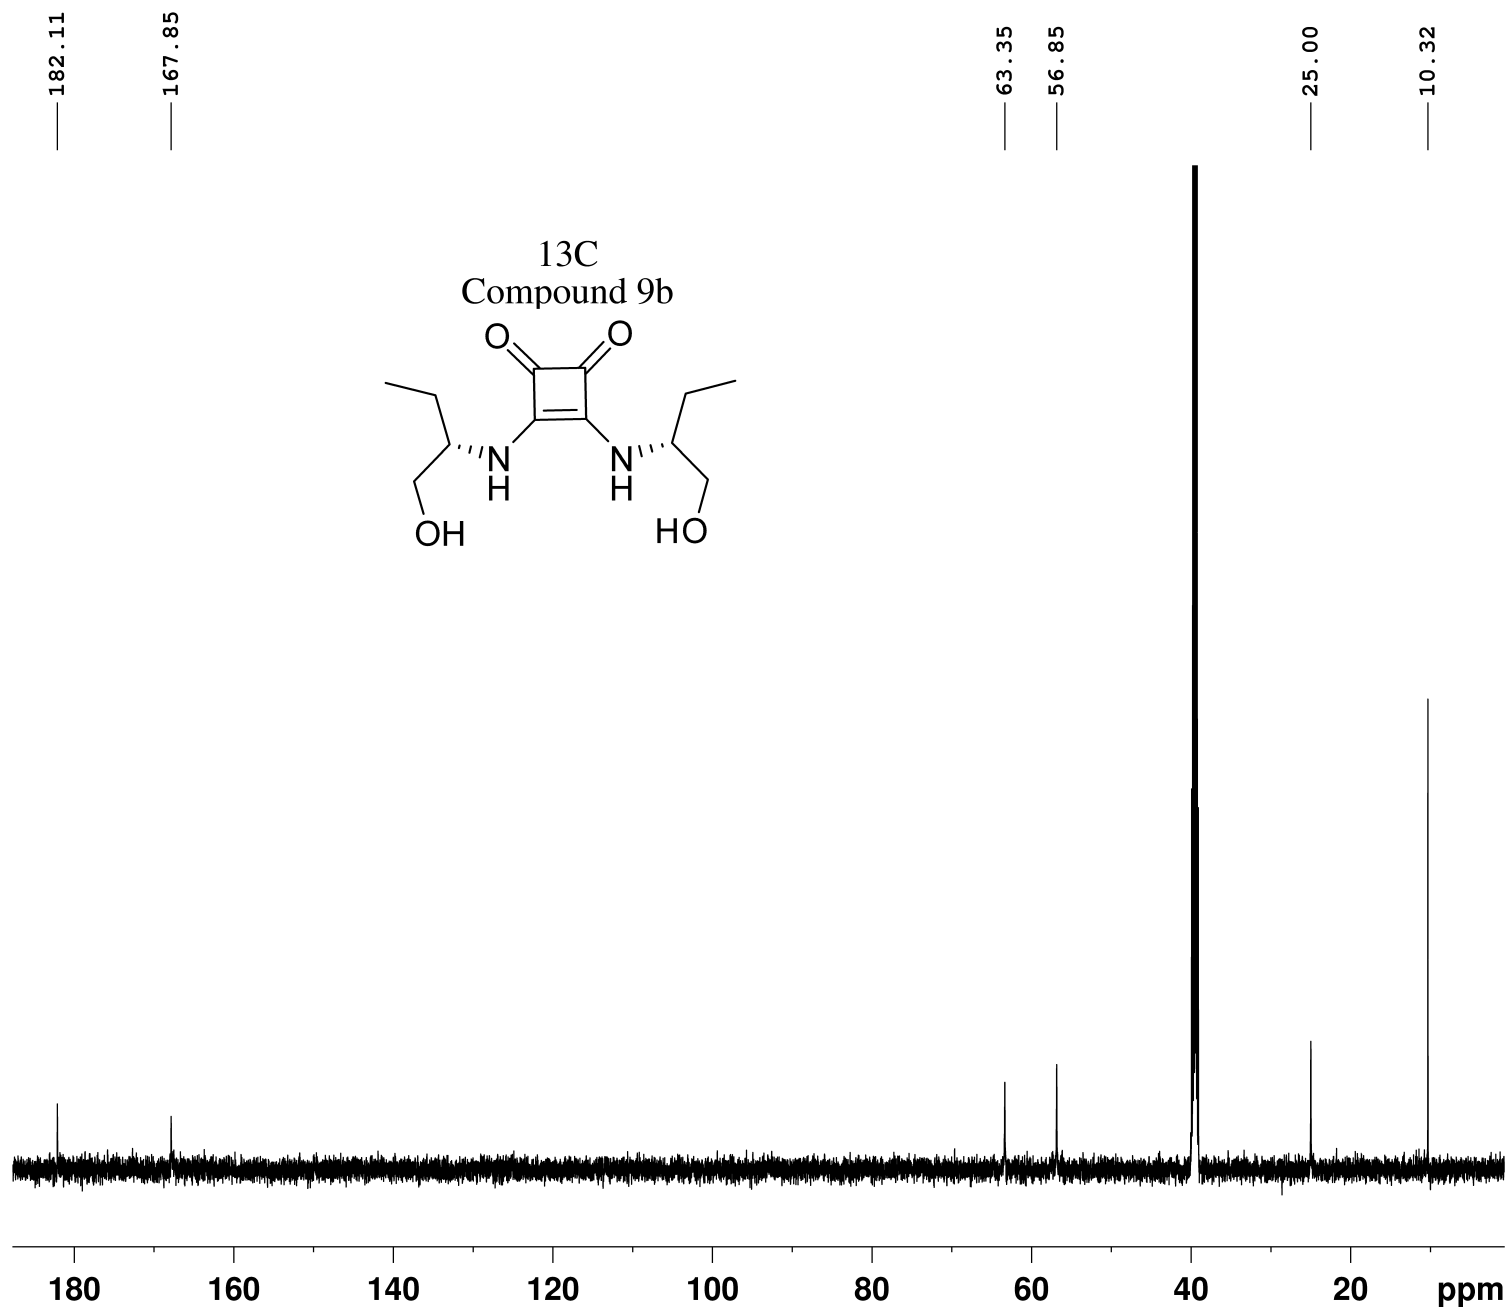

NAME DL-176  
EXPNO 12  
PROCNO 1  
Date\_ 20140212  
Time 17.19  
INSTRUM spect  
PROBHD 5 mm PABBO BB-  
PULPROG zgdc30  
TD 32768  
SOLVENT DMSO  
NS 128  
DS 0  
SWH 36057.691 Hz  
FIDRES 1.100393 Hz  
AQ 0.4544329 sec  
RG 2050  
DW 13.867 usec  
DE 7.48 usec  
TE 293.1 K  
D1 1.5000000 sec  
D11 0.0300000 sec  
TD0 1

===== CHANNEL f1 =====  
SFO1 150.9188042 MHz  
NUC1 13C  
P1 10.75 usec  
SI 65536  
SF 150.9028600 MHz  
WDW EM  
SSB 0  
LB 1.00 Hz  
GB 0  
PC 1.00

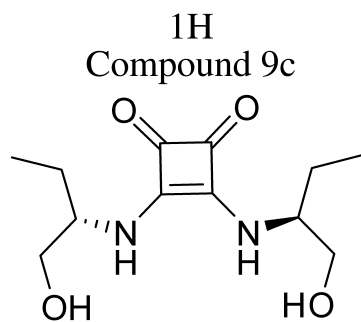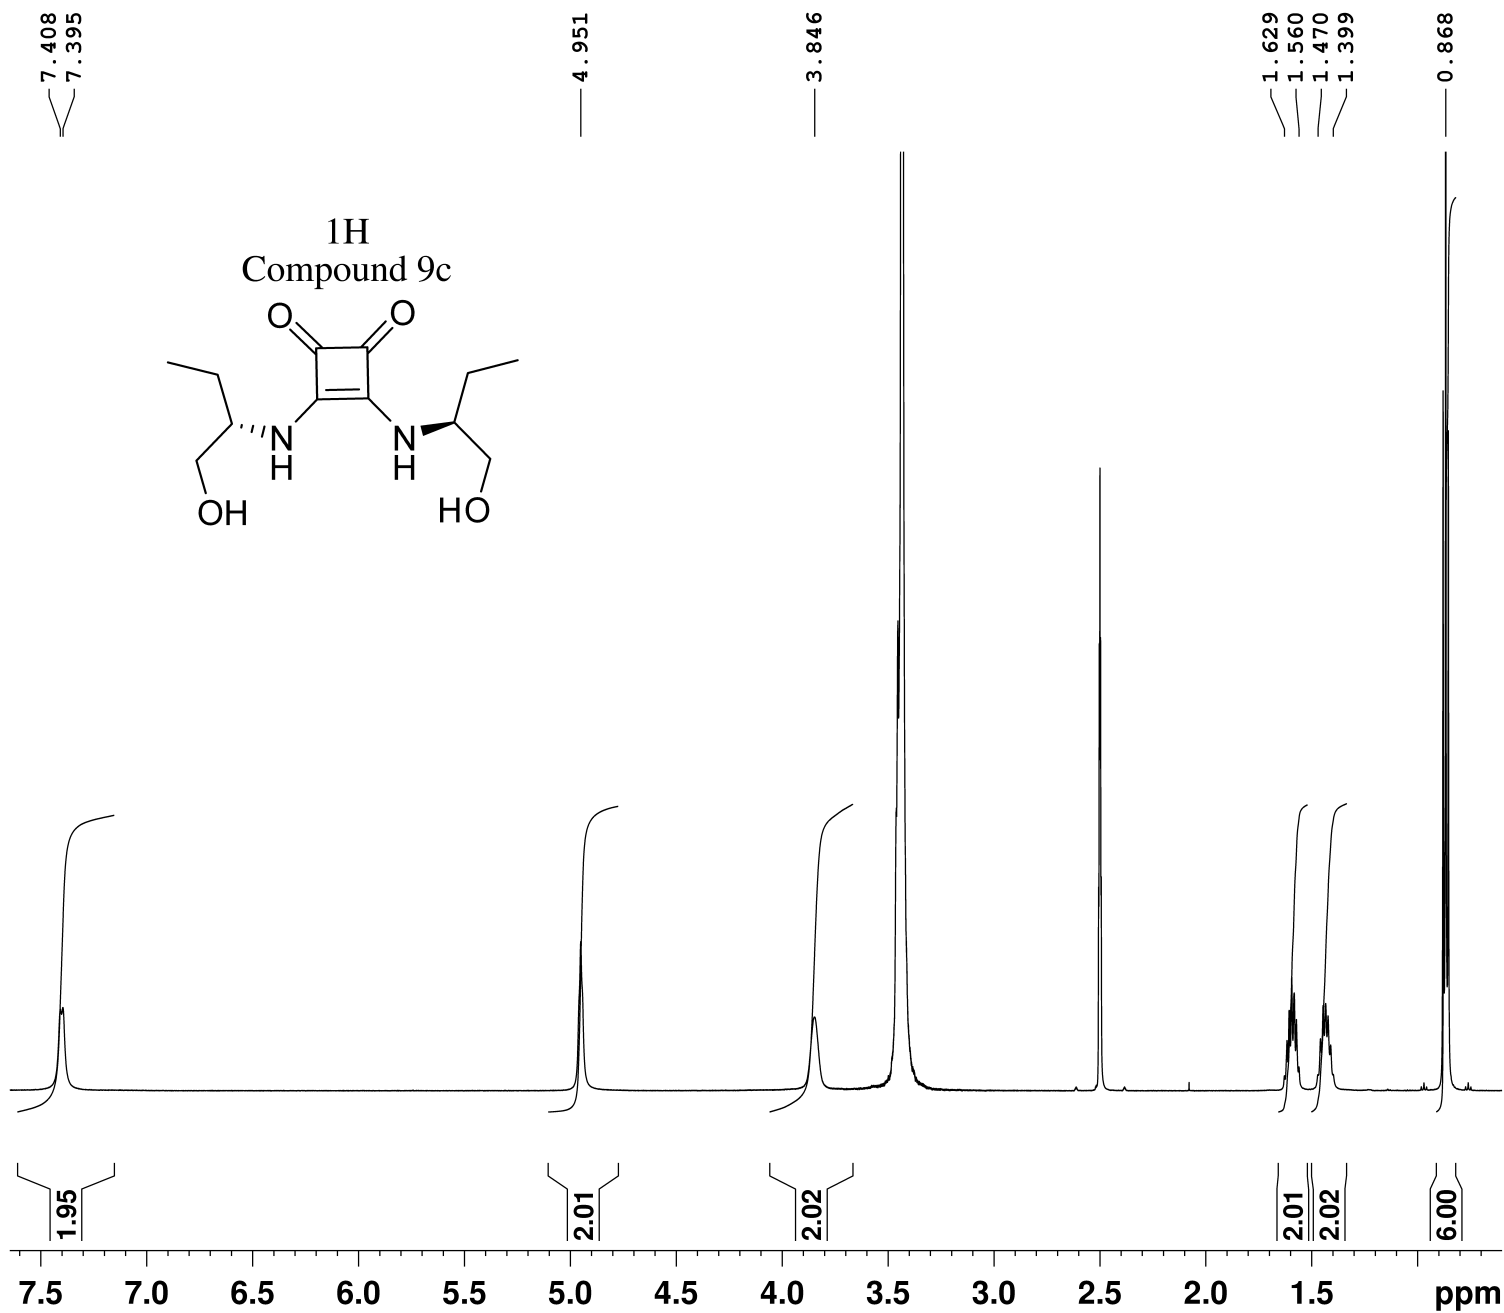

```

NAME          DL-173
EXPNO          11
PROCNO         1
Date_          20140131
Time           17.48
INSTRUM        spect
PROBHD         5 mm PABBO BB-
PULPROG        zg30
TD             32768
SOLVENT        DMSO
NS             16
DS             0
SWH            9615.385 Hz
FIDRES         0.293438 Hz
AQ            1.7039860 sec
RG             36
DW            52.000 usec
DE            13.95 usec
TE            293.0 K
D1            1.00000000 sec
TD0            1
  
```

```

===== CHANNEL f1 =====
SFO1          600.1345610 MHz
NUC1           1H
P1            10.85 usec
SI            65536
SF            600.1300074 MHz
WDW            EM
SSB            0
LB            0.10 Hz
GB            0
PC            1.00
  
```

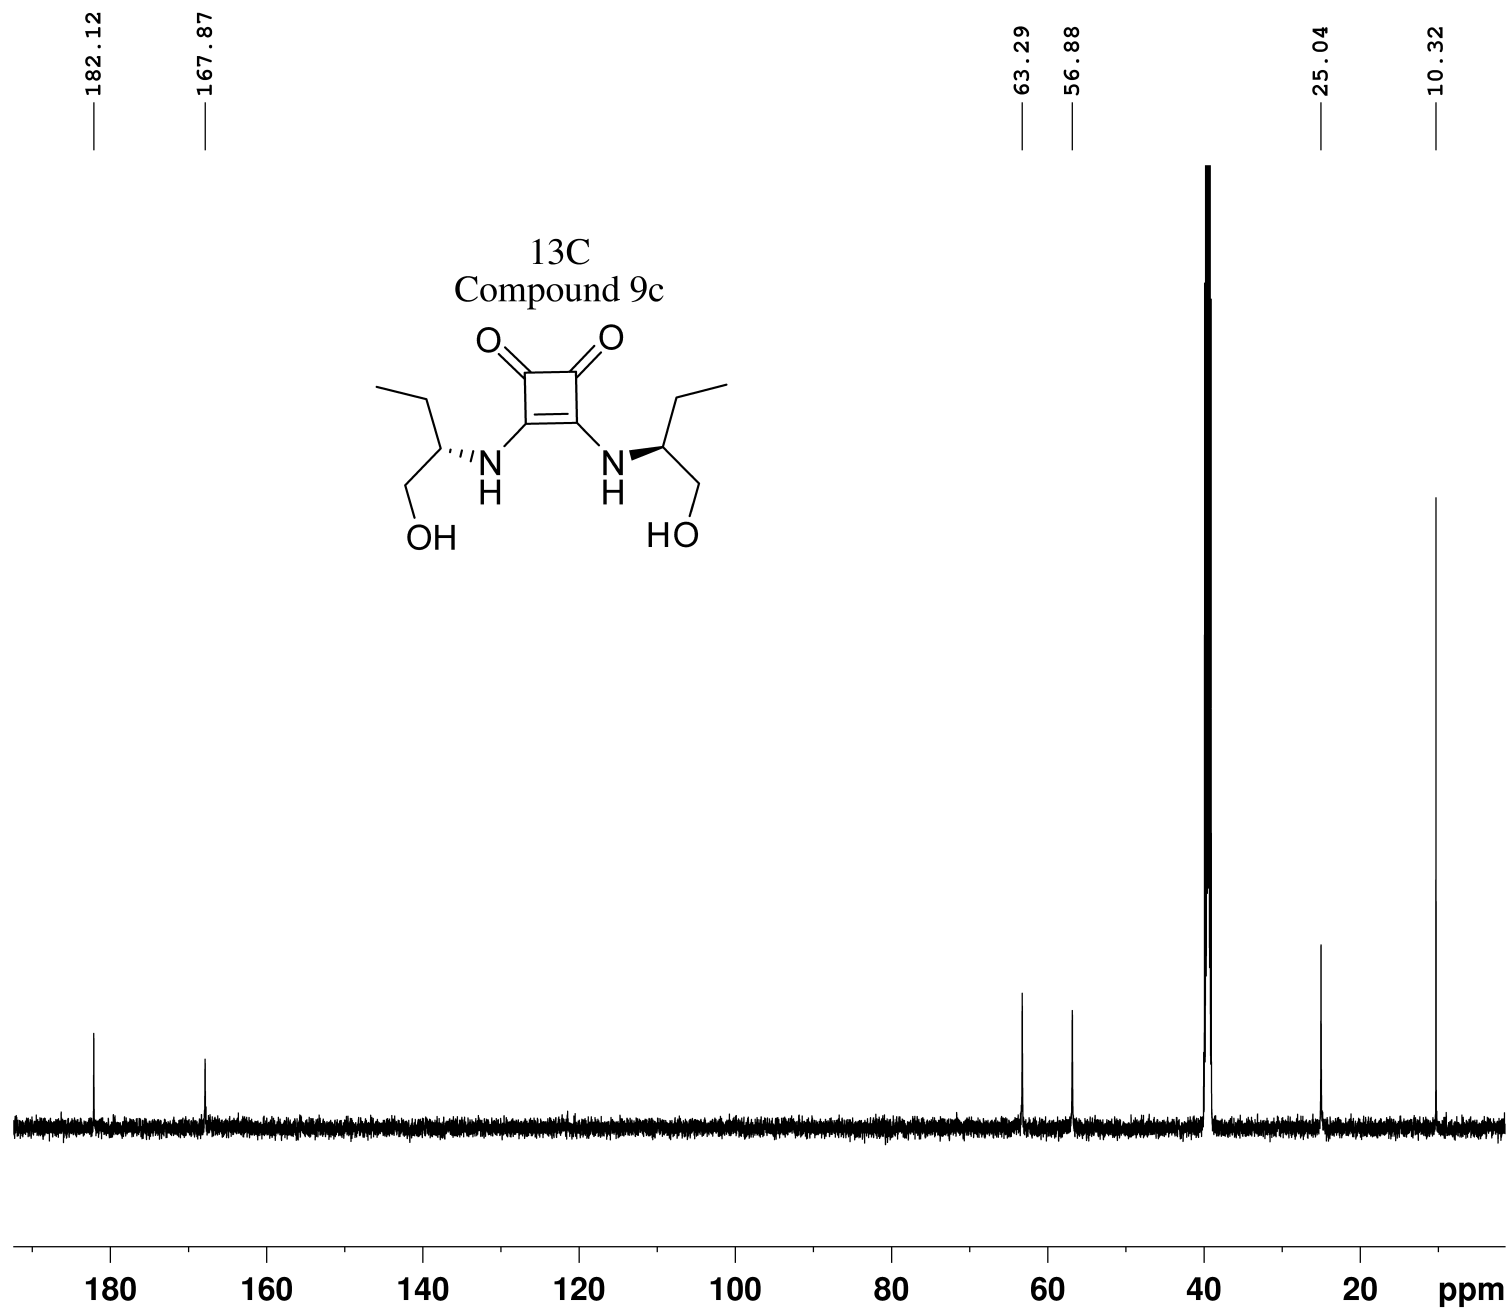

NAME DL-173  
EXPNO 12  
PROCNO 1  
Date\_ 20140131  
Time 18.23  
INSTRUM spect  
PROBHD 5 mm PABBO BB-  
PULPROG zgdc30  
TD 32768  
SOLVENT DMSO  
NS 1024  
DS 0  
SWH 36057.691 Hz  
FIDRES 1.100393 Hz  
AQ 0.4544329 sec  
RG 2050  
DW 13.867 usec  
DE 7.48 usec  
TE 293.0 K  
D1 1.5000000 sec  
D11 0.0300000 sec  
TD0 1

===== CHANNEL f1 =====  
SFO1 150.9188042 MHz  
NUC1 13C  
P1 10.75 usec  
SI 65536  
SF 150.9028613 MHz  
WDW EM  
SSB 0  
LB 1.00 Hz  
GB 0  
PC 1.00

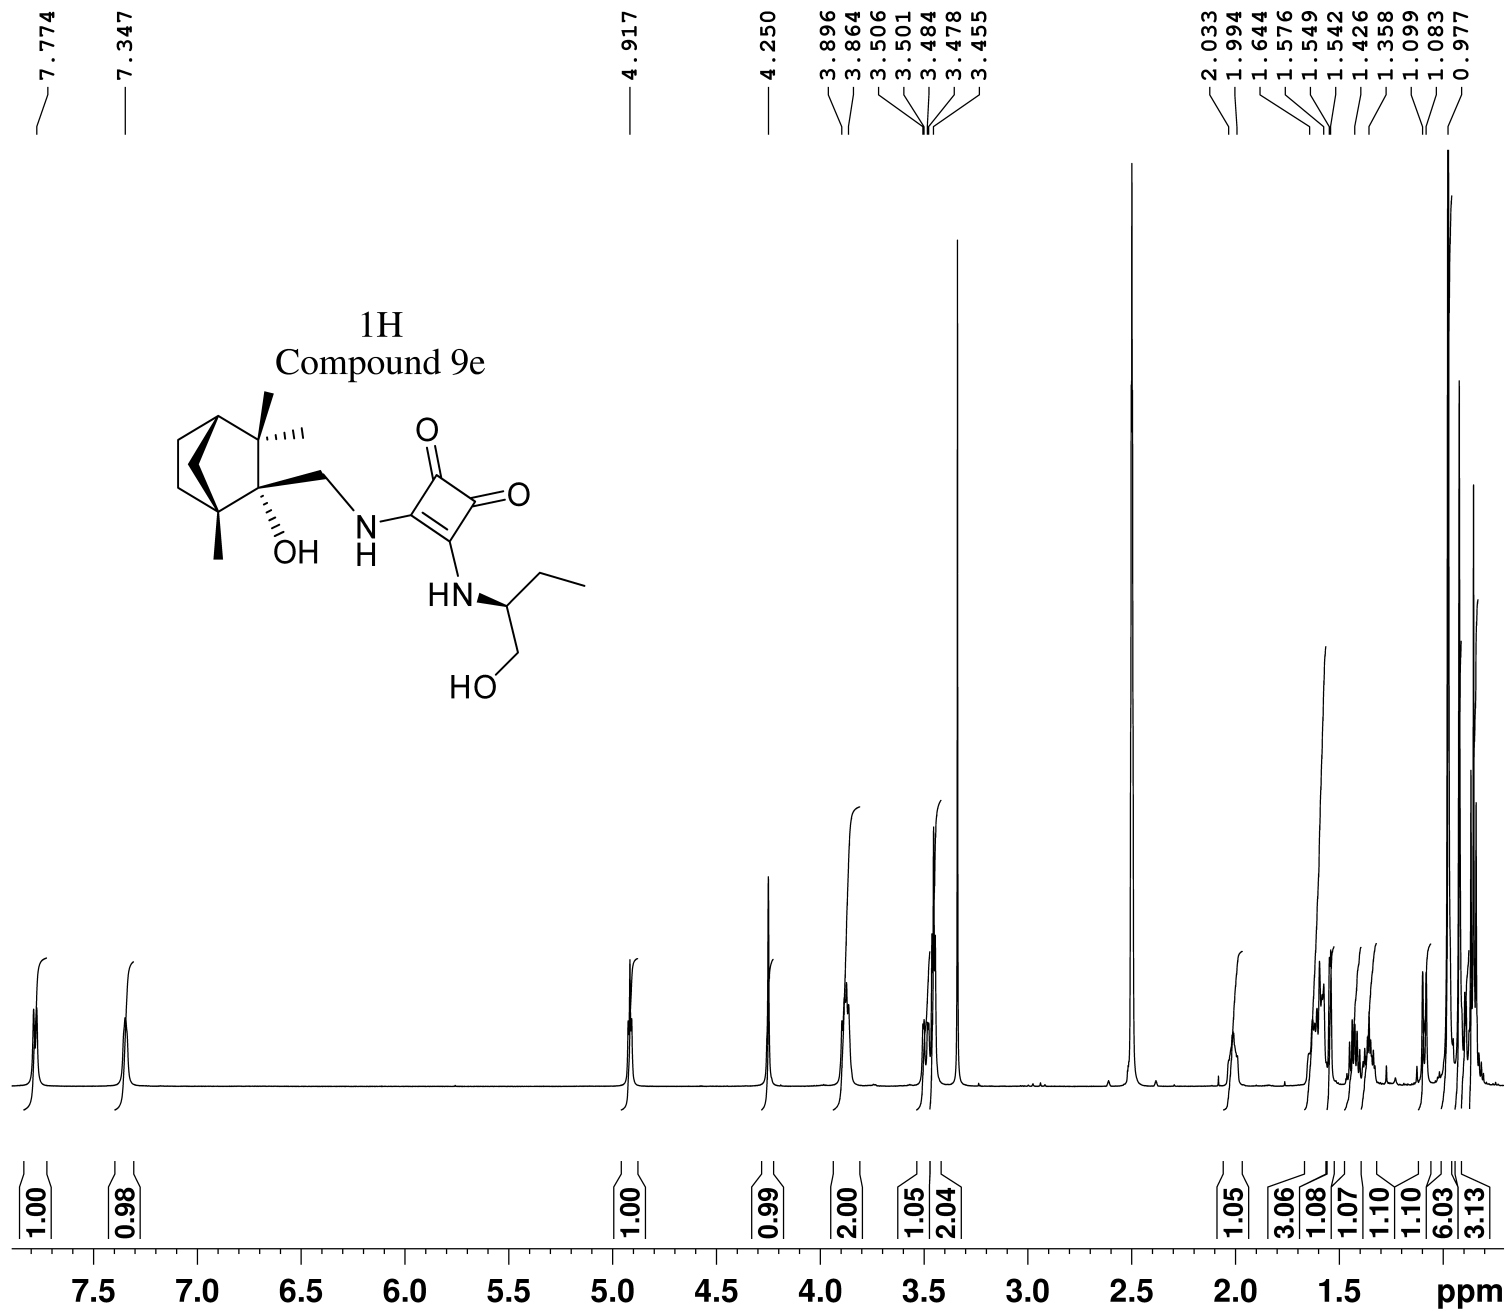

```

NAME          YNC04103A
EXPNO          11
PROCNO         1
Date_          20141113
Time           19.15
INSTRUM        spect
PROBHD         5 mm PABBO BB-
PULPROG        zg30
TD             32768
SOLVENT        DMSO
NS              32
DS              0
SWH            9615.385 Hz
FIDRES         0.293438 Hz
AQ             1.7039860 sec
RG             144
DW             52.000 usec
DE             13.95 usec
TE             293.0 K
D1             1.00000000 sec
TD0            1

===== CHANNEL f1 =====
SFO1           600.1345610 MHz
NUC1            1H
P1             10.85 usec
SI             65536
SF             600.1300046 MHz
WDW            EM
SSB            0
LB             0.10 Hz
GB            0
PC             1.00

```

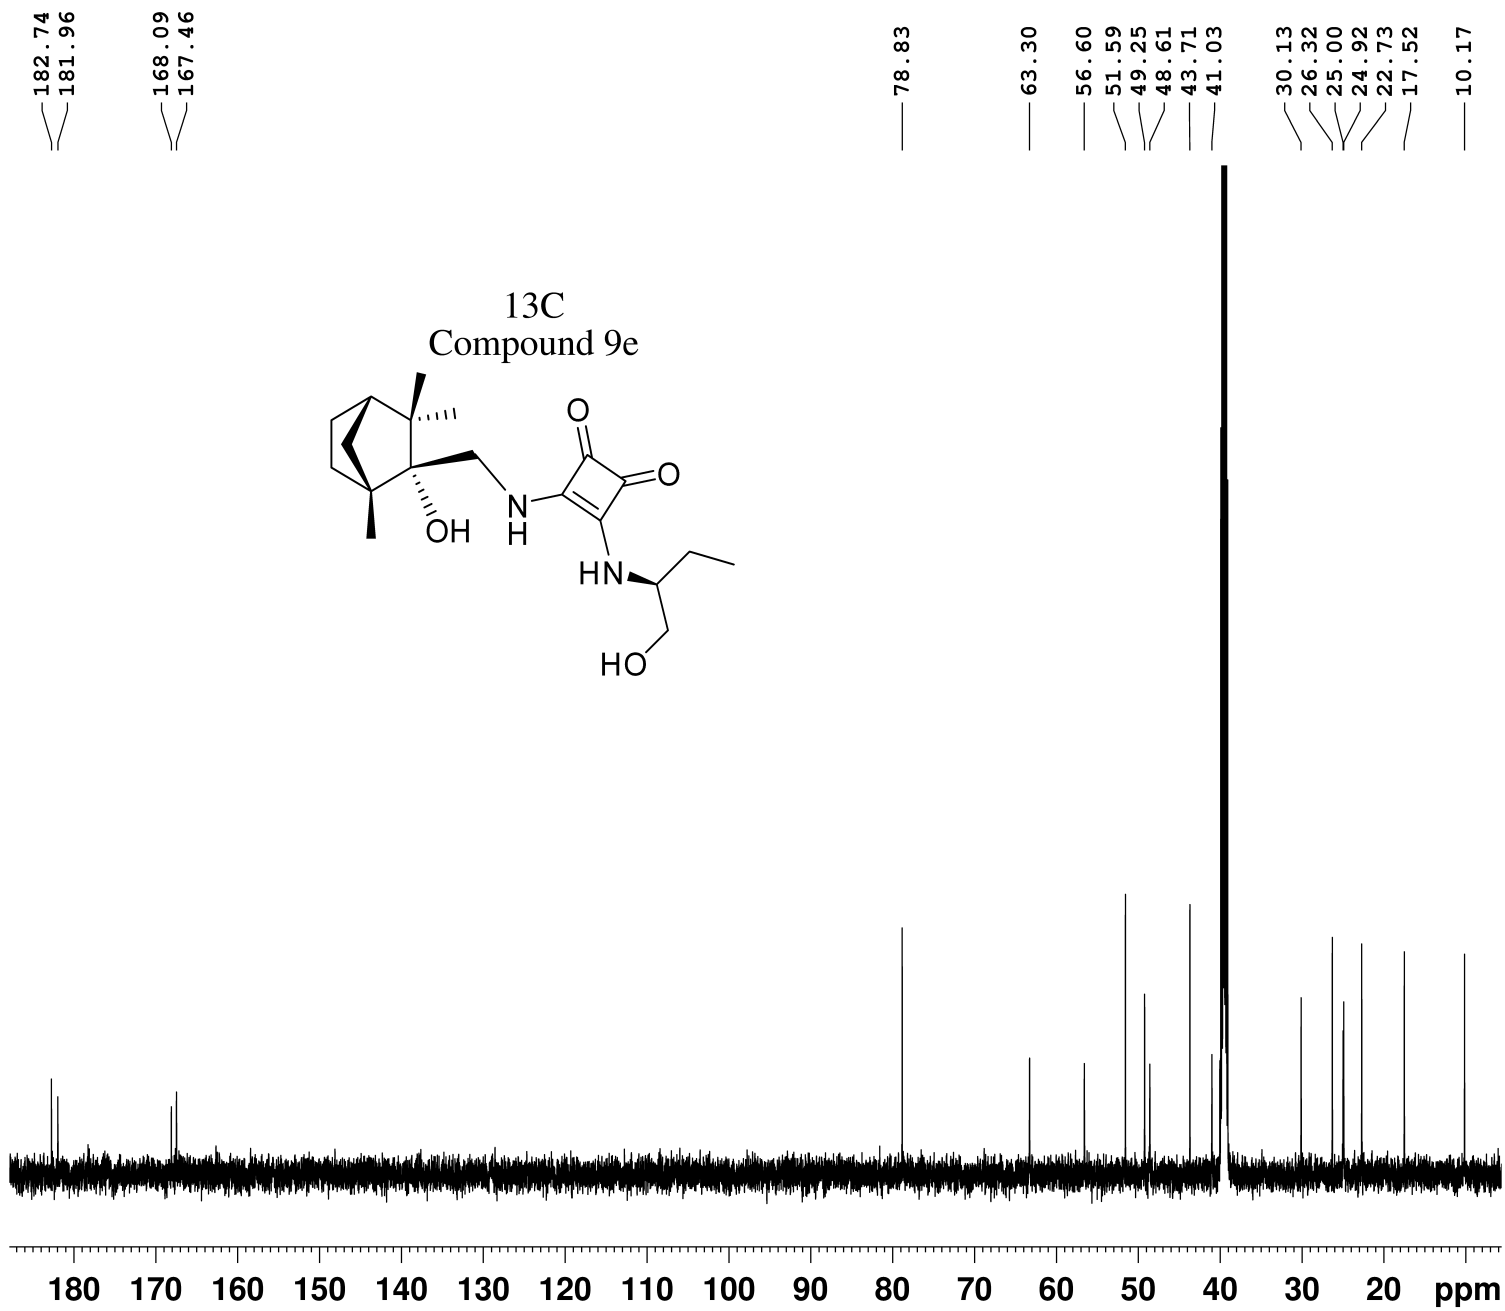

|         |                |
|---------|----------------|
| NAME    | YNC04103A      |
| EXPNO   | 12             |
| PROCNO  | 1              |
| Date_   | 20141113       |
| Time    | 19.24          |
| INSTRUM | spect          |
| PROBHD  | 5 mm PABBO BB- |
| PULPROG | zgdc30         |
| TD      | 32768          |
| SOLVENT | DMSO           |
| NS      | 256            |
| DS      | 0              |
| SWH     | 36057.691 Hz   |
| FIDRES  | 1.100393 Hz    |
| AQ      | 0.4544329 sec  |
| RG      | 2050           |
| DW      | 13.867 usec    |
| DE      | 7.68 usec      |
| TE      | 293.0 K        |
| D1      | 1.5000000 sec  |
| D11     | 0.0300000 sec  |
| TD0     | 1              |

===== CHANNEL f1 =====

|      |                 |
|------|-----------------|
| SFO1 | 150.9188042 MHz |
| NUC1 | 13C             |
| P1   | 9.80 usec       |
| SI   | 65536           |
| SF   | 150.9028751 MHz |
| WDW  | EM              |
| SSB  | 0               |
| LB   | 1.00 Hz         |
| GB   | 0               |
| PC   | 1.00            |

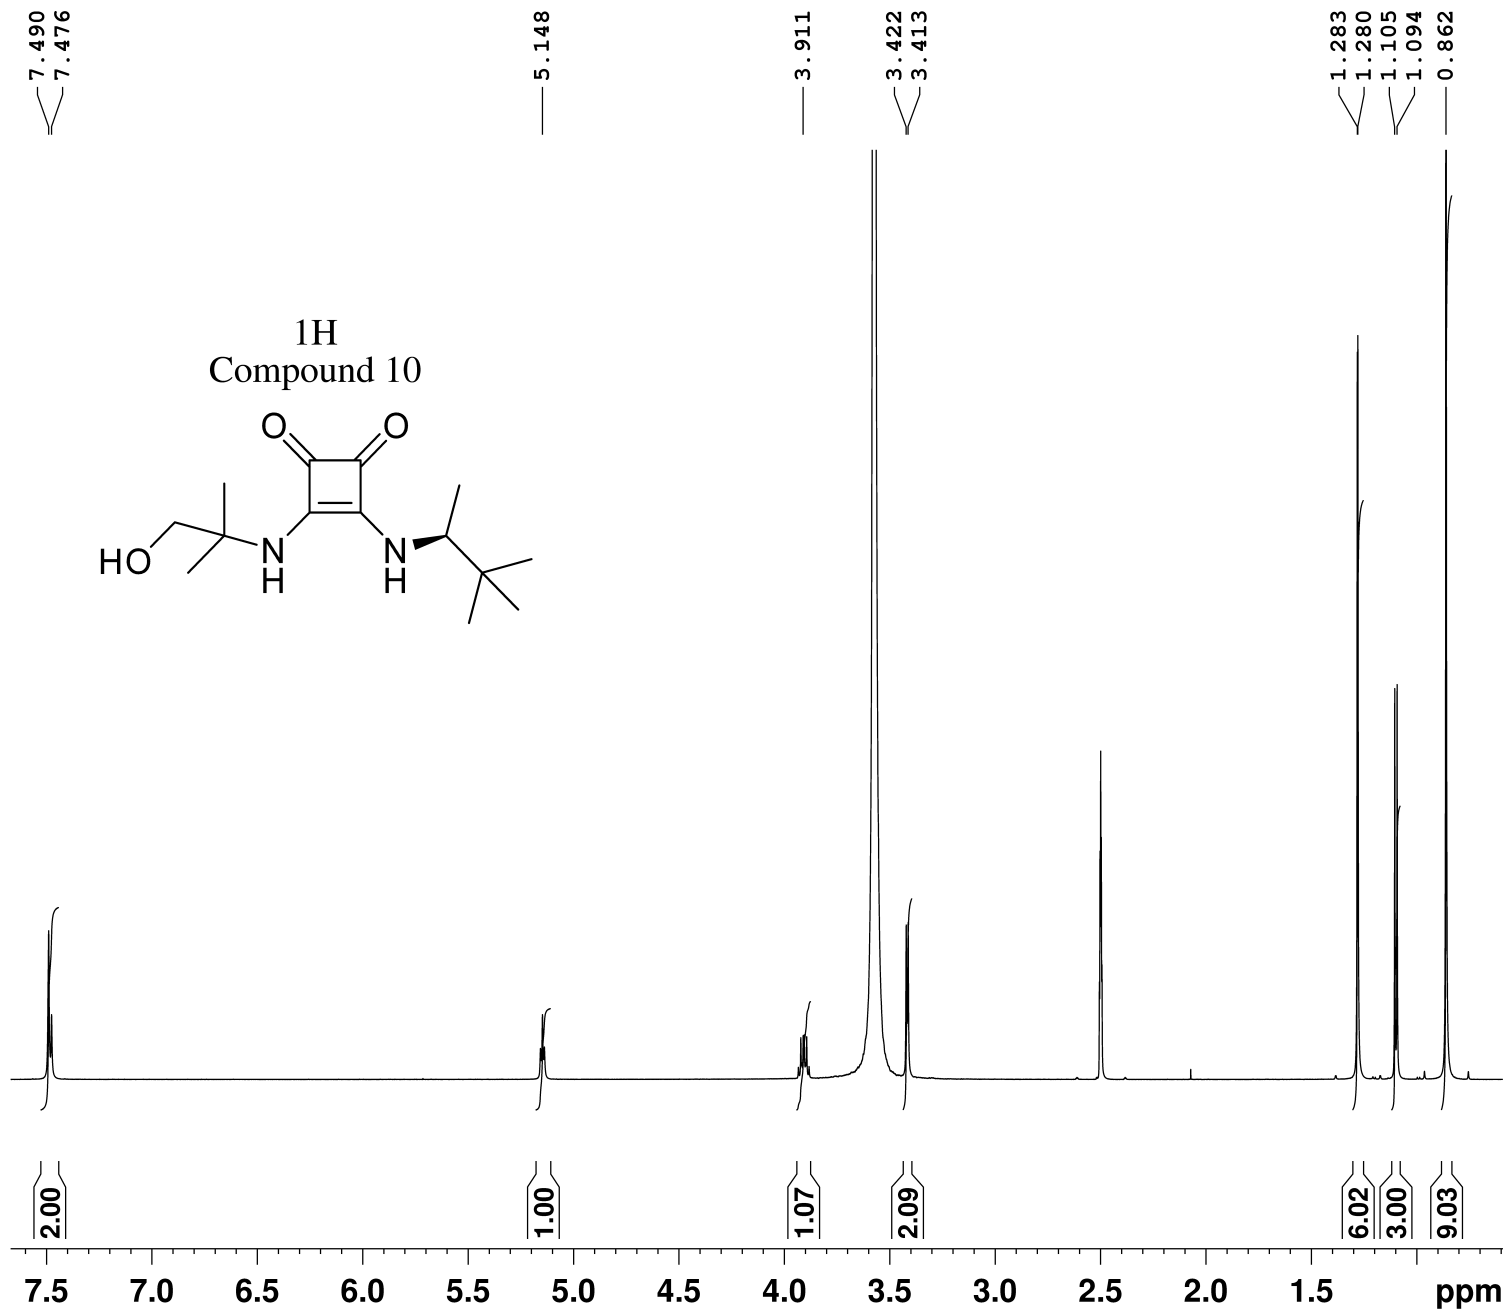

|         |                |
|---------|----------------|
| NAME    | NB_081_03A     |
| EXPNO   | 11             |
| PROCNO  | 1              |
| Date_   | 20140627       |
| Time    | 21.18          |
| INSTRUM | spect          |
| PROBHD  | 5 mm PABBO BB- |
| PULPROG | zg30           |
| TD      | 32768          |
| SOLVENT | DMSO           |
| NS      | 32             |
| DS      | 0              |
| SWH     | 9615.385 Hz    |
| FIDRES  | 0.293438 Hz    |
| AQ      | 1.7039860 sec  |
| RG      | 45.2           |
| DW      | 52.000 usec    |
| DE      | 13.95 usec     |
| TE      | 293.0 K        |
| D1      | 1.00000000 sec |
| TD0     | 1              |

  

|       |                 |       |
|-------|-----------------|-------|
| ===== | CHANNEL f1      | ===== |
| SFO1  | 600.1345610 MHz |       |
| NUC1  | 1H              |       |
| P1    | 10.85 usec      |       |
| SI    | 65536           |       |
| SF    | 600.1300050 MHz |       |
| WDW   | EM              |       |
| SSB   | 0               |       |
| LB    | 0.10 Hz         |       |
| GB    | 0               |       |
| PC    | 1.00            |       |

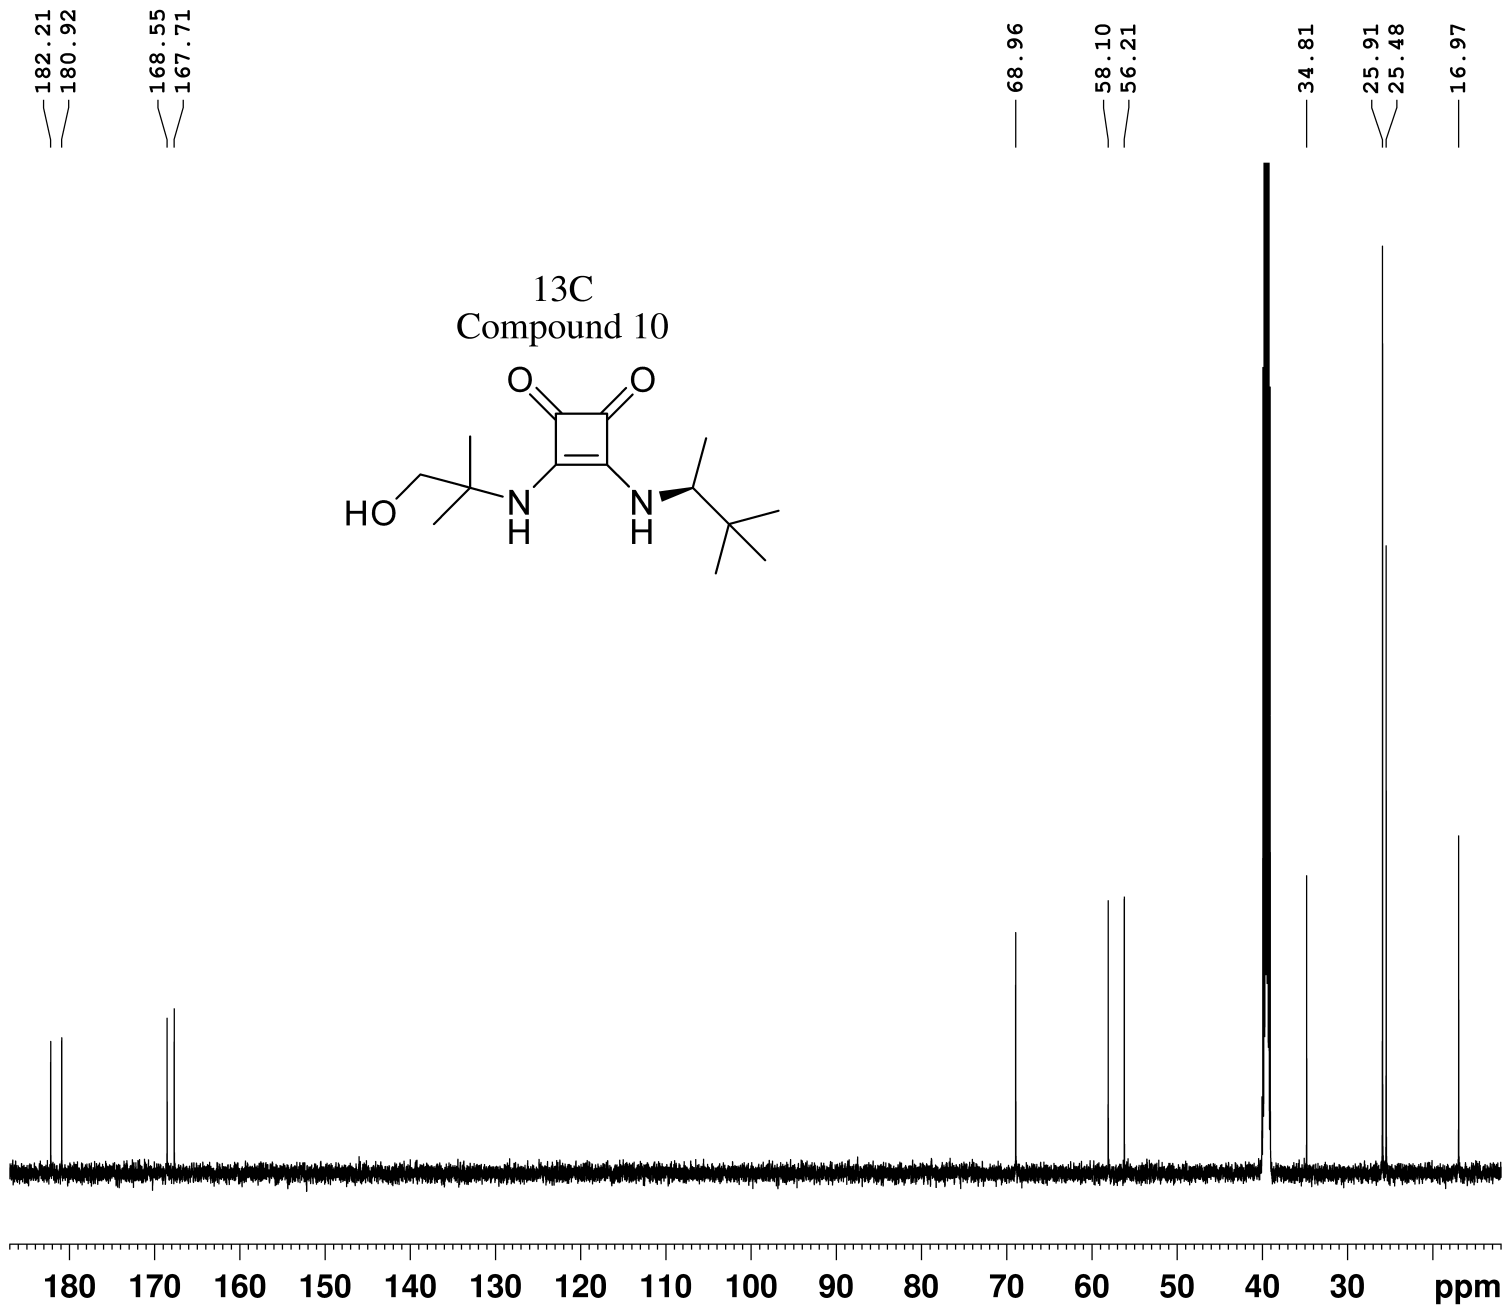

NAME NB\_081\_03A  
EXPNO 12  
PROCNO 1  
Date\_ 20140627  
Time 21.52  
INSTRUM spect  
PROBHD 5 mm PABBO BB-  
PULPROG zgdc30  
TD 32768  
SOLVENT DMSO  
NS 1024  
DS 0  
SWH 36057.691 Hz  
FIDRES 1.100393 Hz  
AQ 0.4544329 sec  
RG 2050  
DW 13.867 usec  
DE 7.48 usec  
TE 293.0 K  
D1 1.50000000 sec  
D11 0.03000000 sec  
TD0 1

===== CHANNEL f1 =====  
SFO1 150.9188042 MHz  
NUC1 13C  
P1 10.75 usec  
SI 65536  
SF 150.9028386 MHz  
WDW EM  
SSB 0  
LB 1.00 Hz  
GB 0  
PC 1.00



**<sup>1</sup>H  
Compound 12a**

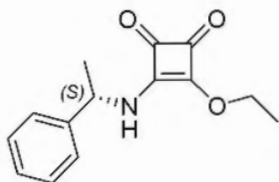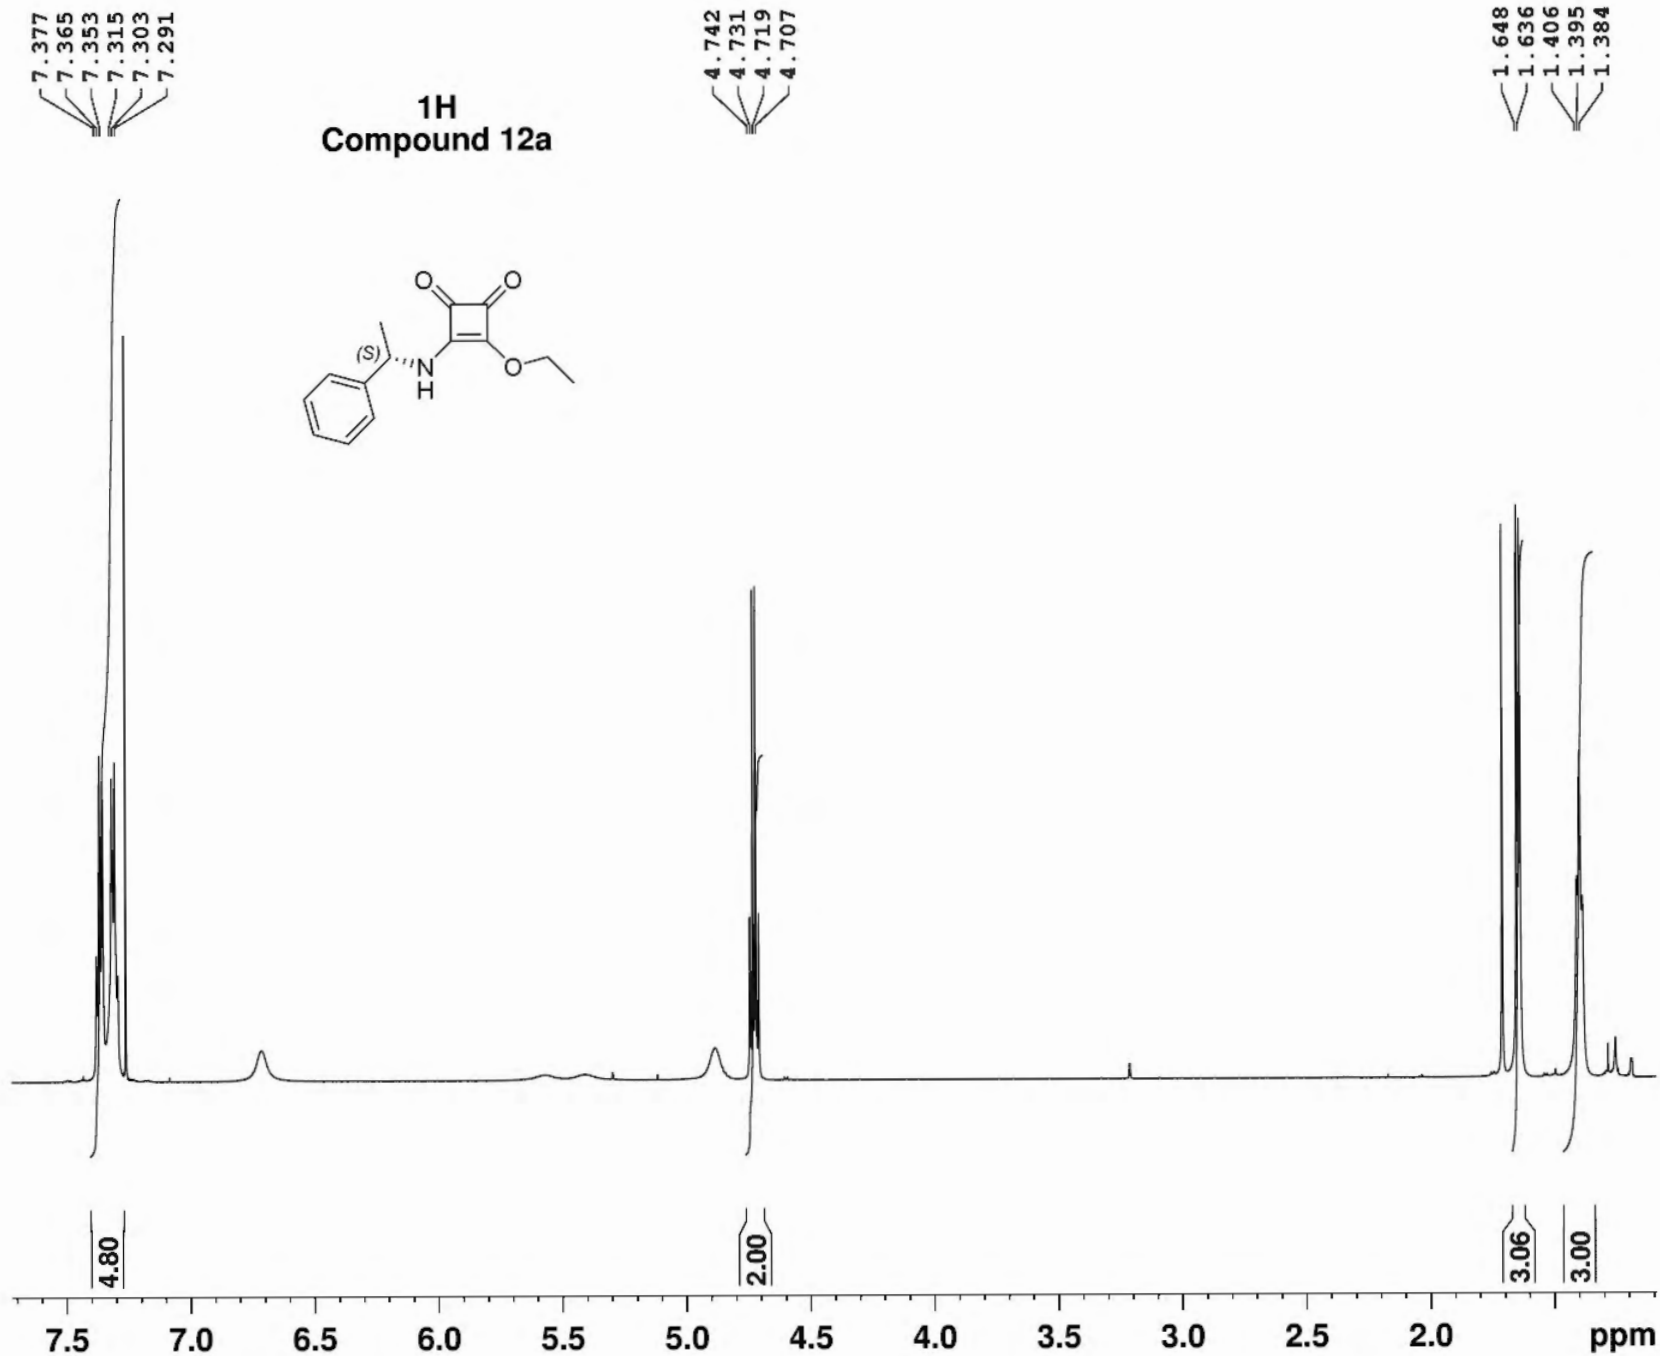

```

NAME      YND01404A
EXPNO     11
PROCNO    1
Date_     20160912
Time      18.47
INSTRUM   spect
PROBHD    5 mm PABBO BB-
PULPROG   zg30
TD        32768
SOLVENT   CDCl3
NS        32
DS        0
SWH       9615.385 Hz
FIDRES    0.293438 Hz
AQ        1.7039860 sec
RG        256
DW        52.000 usec
DE        13.95 usec
TE        298.0 K
D1        1.00000000 sec
TD0       1
  
```

```

===== CHANNEL f1 =====
SFO1      600.1145608 MHz
NUC1      1H
P1        10.85 usec
SI        65536
SF        600.1100150 MHz
WDW       EM
SSB       0
LB        0.00 Hz
GB        0
PC        1.00
  
```

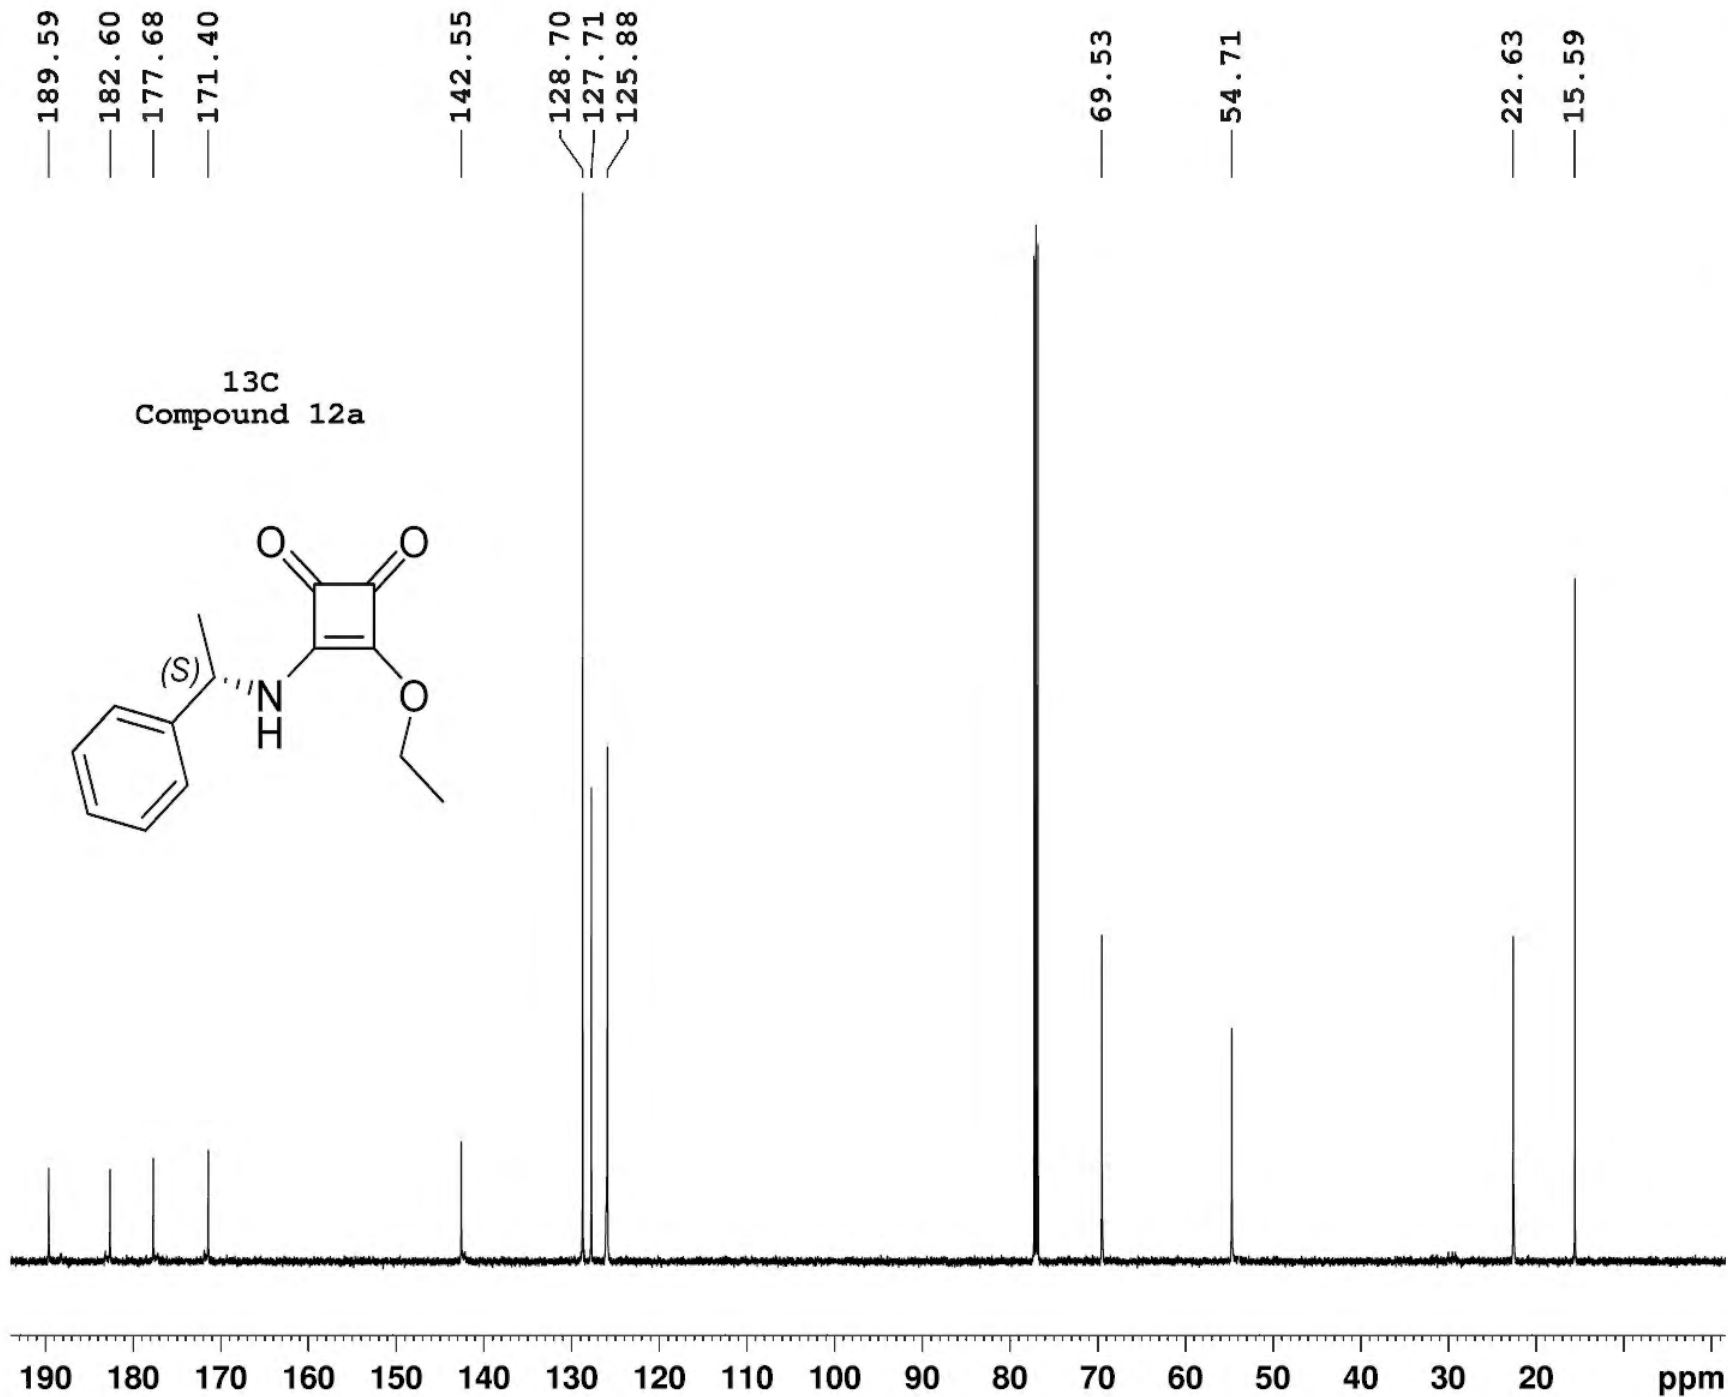

```

NAME      YND-014-AB
EXPNO     12
PROCNO    1
Date_     20210825
Time      19.37 h
INSTRUM   spect
PROBHD    Z847801_0047 (
PULPROG   zgpg30
TD         32768
SOLVENT   CDCl3
NS         512
DS         0
SWH        36057.691 Hz
FIDRES     2.200787 Hz
AQ         0.4544329 sec
RG         2050
DW         13.867 usec
DE         6.50 usec
TE         293.0 K
D1         1.50000000 sec
D11        0.03000000 sec
TDO        1
SFO1       150.8892338 MHz
NUC1       13C
P0         3.27 usec
P1         9.80 usec
SI         65536
SF         150.8726602 MHz
WDW        EM
SSB        0
LB         1.00 Hz
GB         0
PC         1.40
  
```

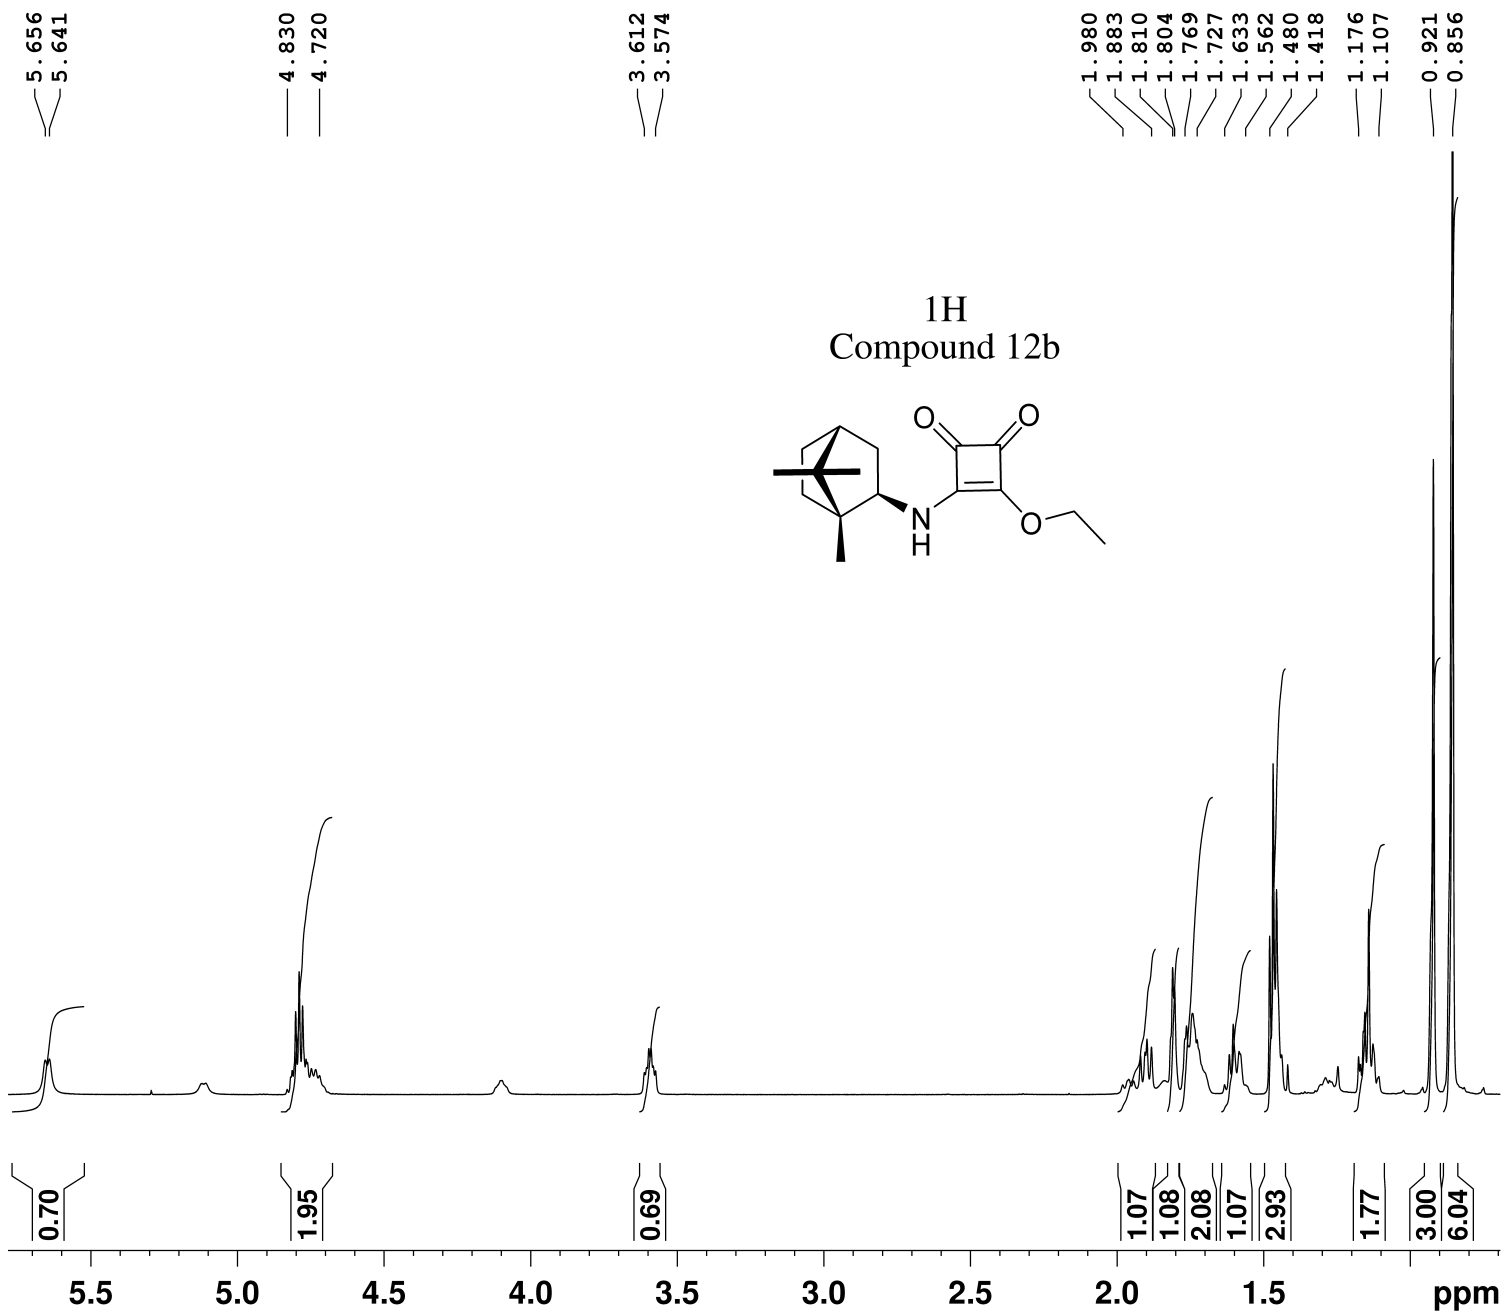

```

NAME          YNC06308
EXPNO          11
PROCNO         1
Date_          20150505
Time           7.46
INSTRUM        spect
PROBHD         5 mm PABBO BB-
PULPROG        zg30
TD             32768
SOLVENT        CDC13
NS              32
DS              0
SWH            9615.385 Hz
FIDRES         0.293438 Hz
AQ             1.7039860 sec
RG              161
DW             52.000 usec
DE             13.95 usec
TE             298.0 K
D1             1.00000000 sec
TD0            1

===== CHANNEL f1 =====
SFO1           600.1145608 MHz
NUC1            1H
P1             10.85 usec
SI             65536
SF             600.1100148 MHz
WDW            EM
SSB            0
LB             0.00 Hz
GB            0
PC             1.00

```

—188.99  
—183.04  
—176.74  
—172.02

<sup>13</sup>C  
Compound 12b

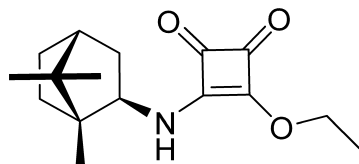

—69.57  
—63.20  
—49.80  
—47.02  
—44.70  
—39.00  
—35.49  
—26.81  
—20.25  
—15.88  
—11.61

NAME YNC06308  
EXPNO 12  
PROCNO 1  
Date\_ 20150505  
Time 7.51  
INSTRUM spect  
PROBHD 5 mm PABBO BB-  
PULPROG zgdc30  
TD 32768  
SOLVENT CDC13  
NS 128  
DS 0  
SWH 36057.691 Hz  
FIDRES 1.100393 Hz  
AQ 0.4544329 sec  
RG 2050  
DW 13.867 usec  
DE 6.50 usec  
TE 298.0 K  
D1 1.50000000 sec  
D11 0.03000000 sec  
TD0 1

===== CHANNEL f1 =====  
SFO1 150.9143788 MHz  
NUC1 13C  
P1 9.80 usec  
SI 65536  
SF 150.8977847 MHz  
WDW EM  
SSB 0  
LB 1.00 Hz  
GB 0  
PC 1.40

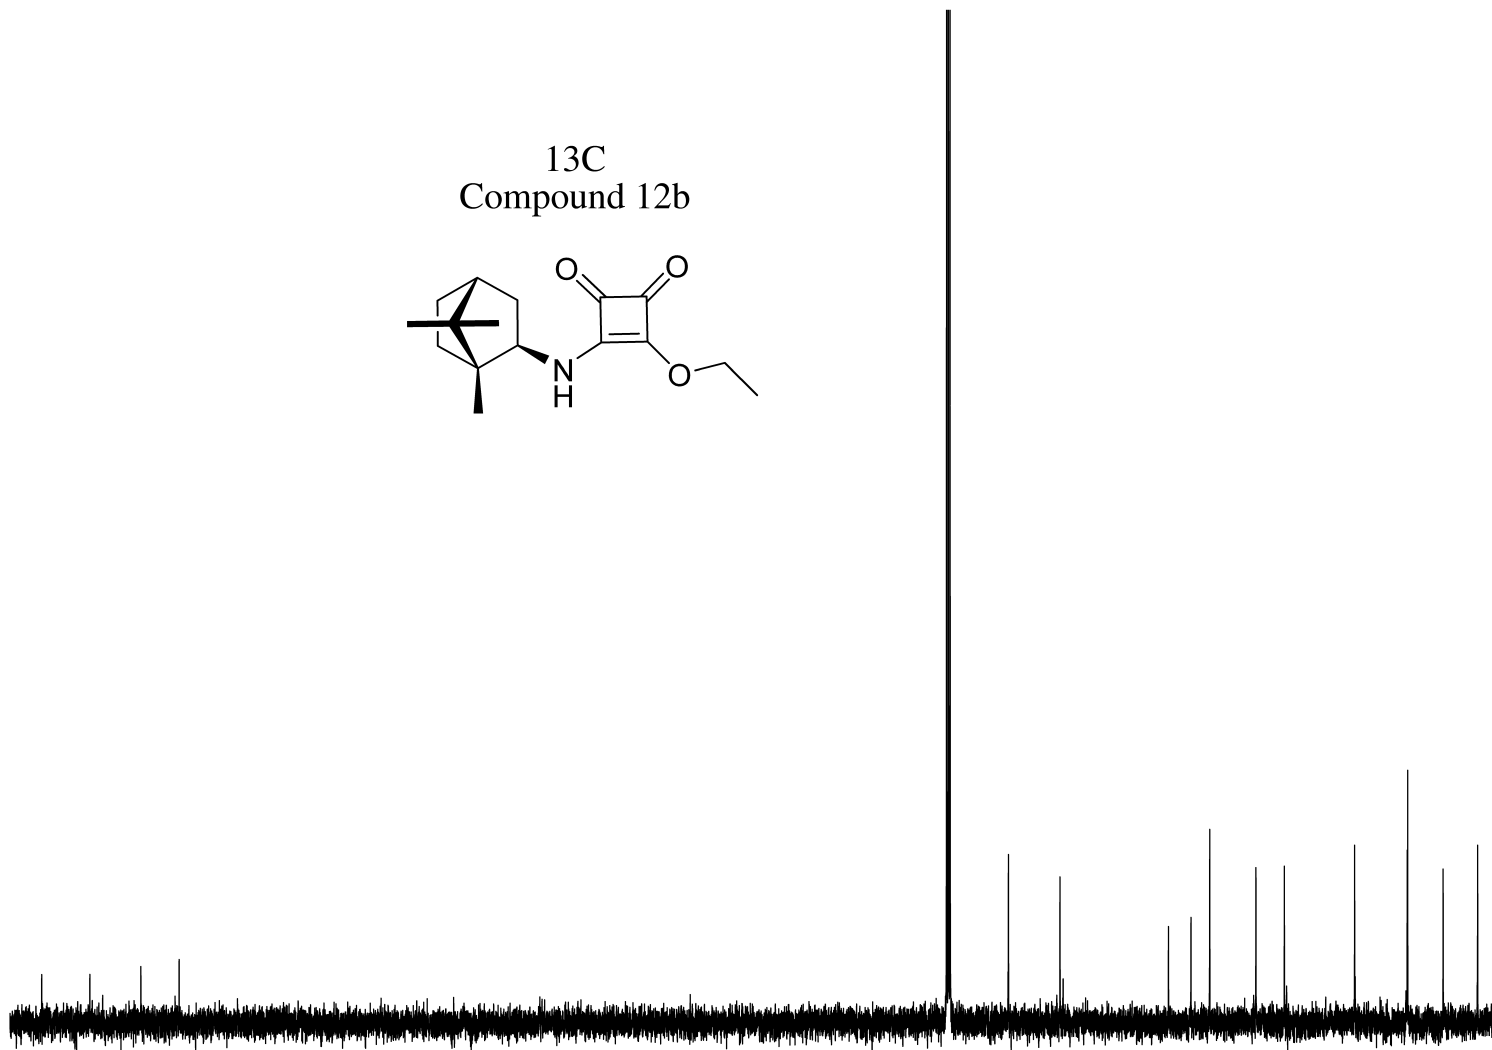

180 170 160 150 140 130 120 110 100 90 80 70 60 50 40 30 ppm

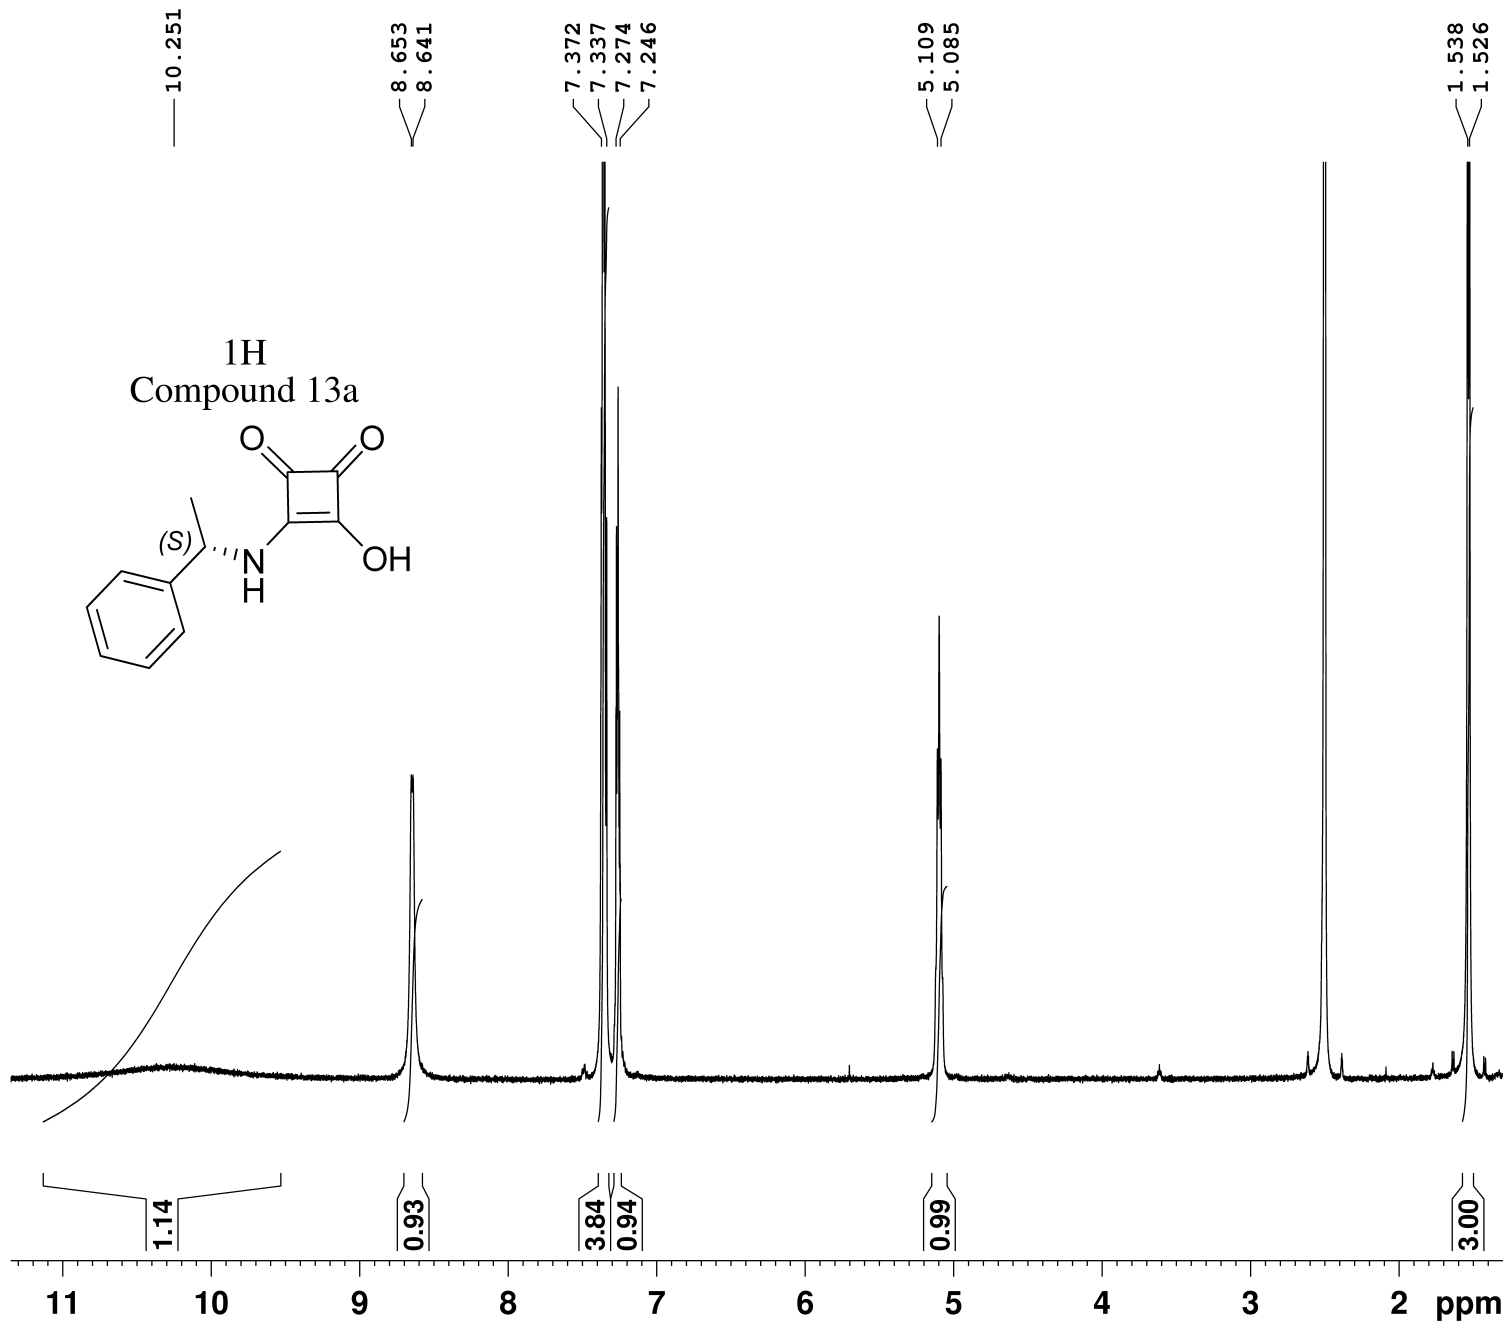

```

NAME          YNC-07202B
EXPNO          11
PROCNO         1
Date_          20150404
Time           12.07
INSTRUM        spect
PROBHD         5 mm PABBO BB-
PULPROG        zg30
TD             32768
SOLVENT        DMSO
NS             16
DS             0
SWH            9615.385 Hz
FIDRES         0.293438 Hz
AQ             1.7039860 sec
RG             228
DW             52.000 usec
DE             13.95 usec
TE             338.0 K
D1             1.00000000 sec
TD0            1

```

```

===== CHANNEL f1 =====
SFO1          600.1145608 MHz
NUC1           1H
P1            10.85 usec
SI            65536
SF            600.1100037 MHz
WDW            no
SSB            0
LB            0.00 Hz
GB            0
PC            1.00

```

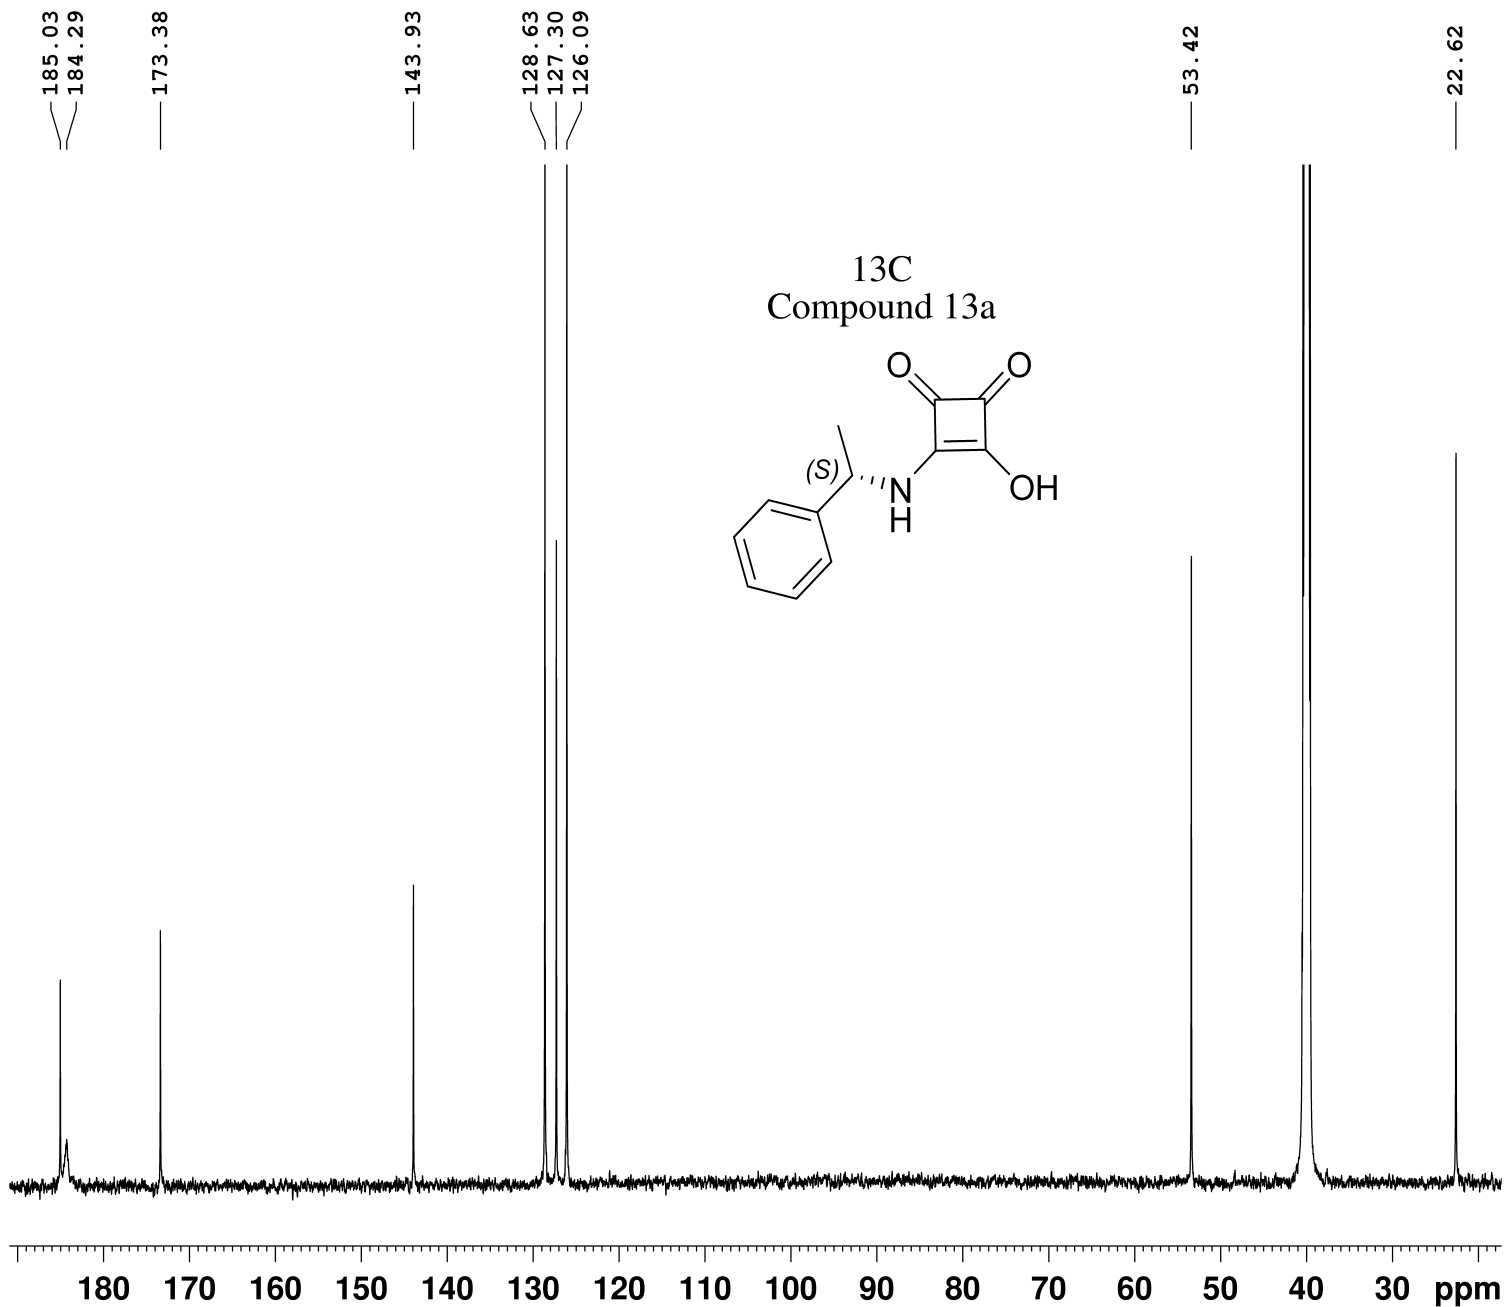

NAME YNC-07202B  
EXPNO 14  
PROCNO 1  
Date\_ 20150404  
Time 12.59  
INSTRUM spect  
PROBHD 5 mm PABBO BB-  
PULPROG zgdc30  
TD 32768  
SOLVENT DMSO  
NS 8192  
DS 0  
SWH 36057.691 Hz  
FIDRES 1.100393 Hz  
AQ 0.4544329 sec  
RG 2050  
DW 13.867 usec  
DE 6.50 usec  
TE 338.0 K  
D1 1.5000000 sec  
D11 0.0300000 sec  
TD0 1

===== CHANNEL f1 =====  
SFO1 150.9143788 MHz  
NUC1 13C  
P1 9.80 usec  
SI 65536  
SF 150.8978255 MHz  
WDW EM  
SSB 0  
LB 5.00 Hz  
GB 0  
PC 1.40

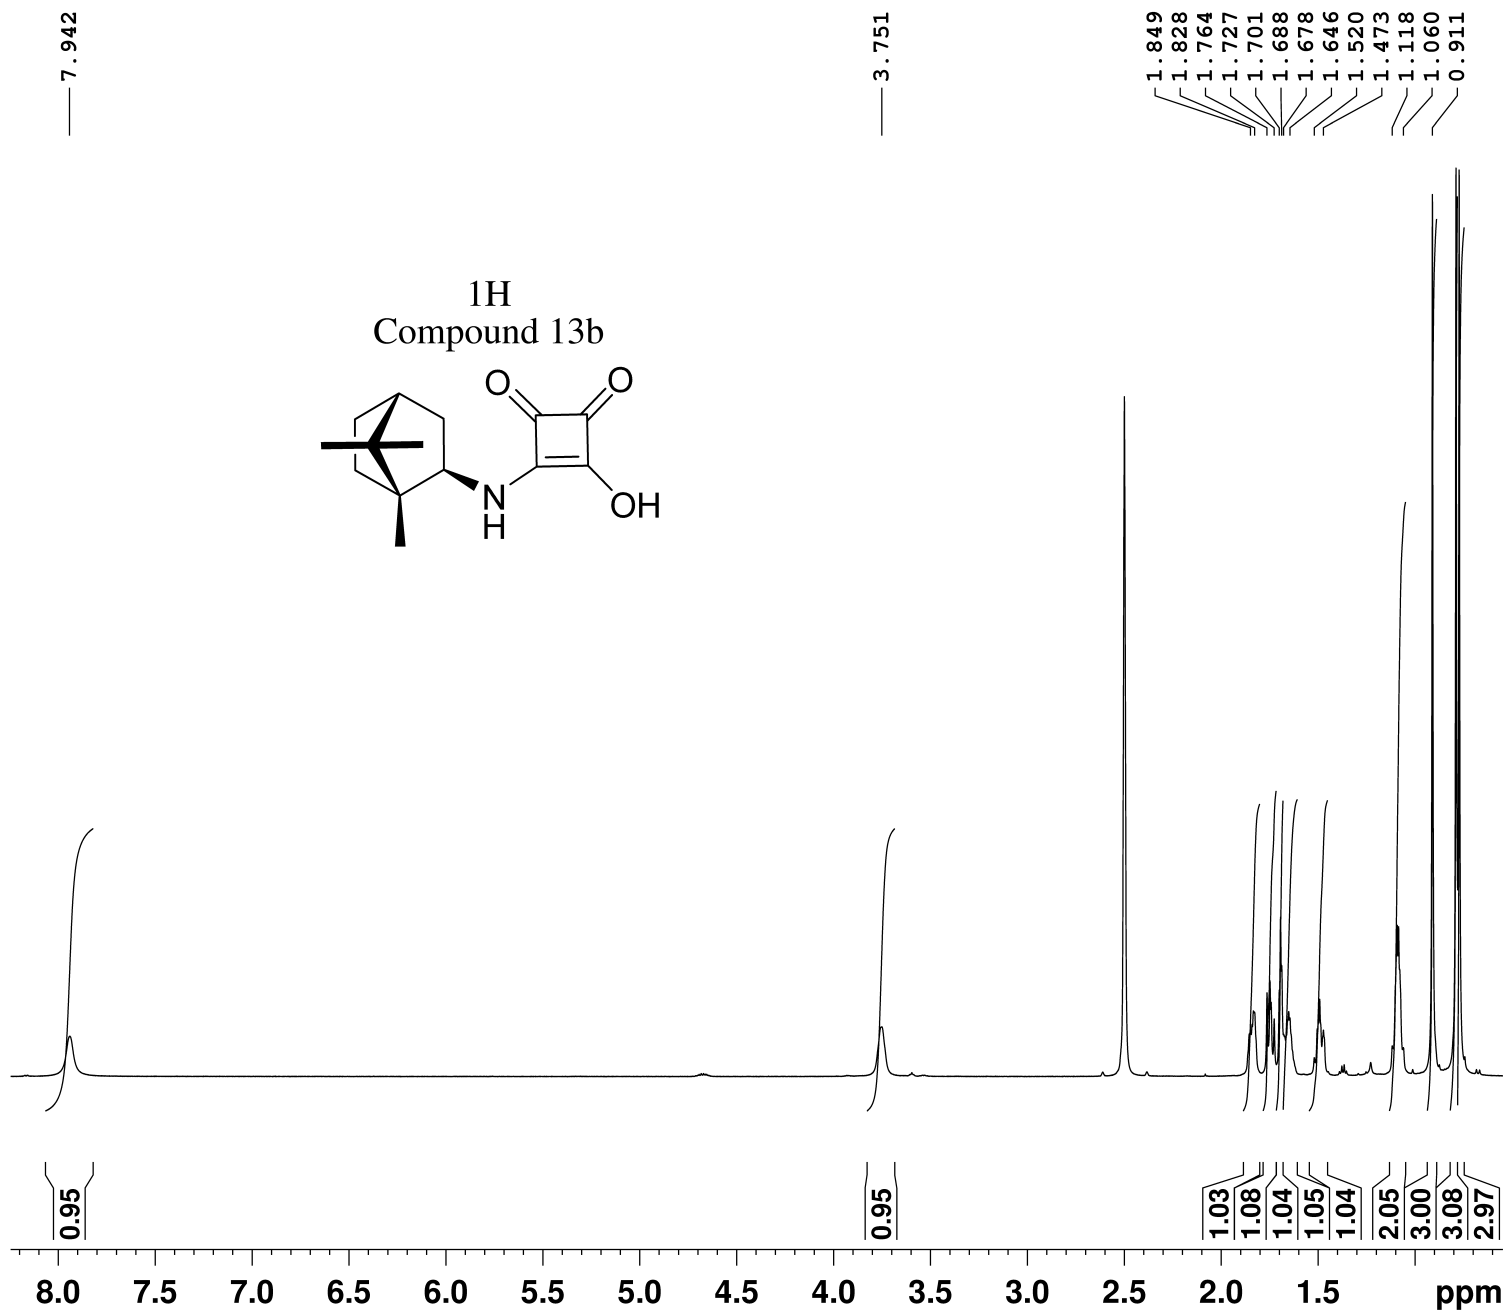

```

NAME          YNC08602
EXPNO         11
PROCNO        1
Date_         20150722
Time          18.47
INSTRUM       spect
PROBHD        5 mm PABBO BB-
PULPROG       zg30
TD            32768
SOLVENT       CDC13
NS            32
DS            0
SWH           9615.385 Hz
FIDRES        0.293438 Hz
AQ            1.7039860 sec
RG            203
DW            52.000 usec
DE            13.95 usec
TE            293.0 K
D1            1.00000000 sec
TD0           1

===== CHANNEL f1 =====
SFO1          600.1145608 MHz
NUC1           1H
P1            10.85 usec
SI            65536
SF            600.1128558 MHz
WDW           EM
SSB           0
LB            0.00 Hz
GB            0
PC            1.00

```

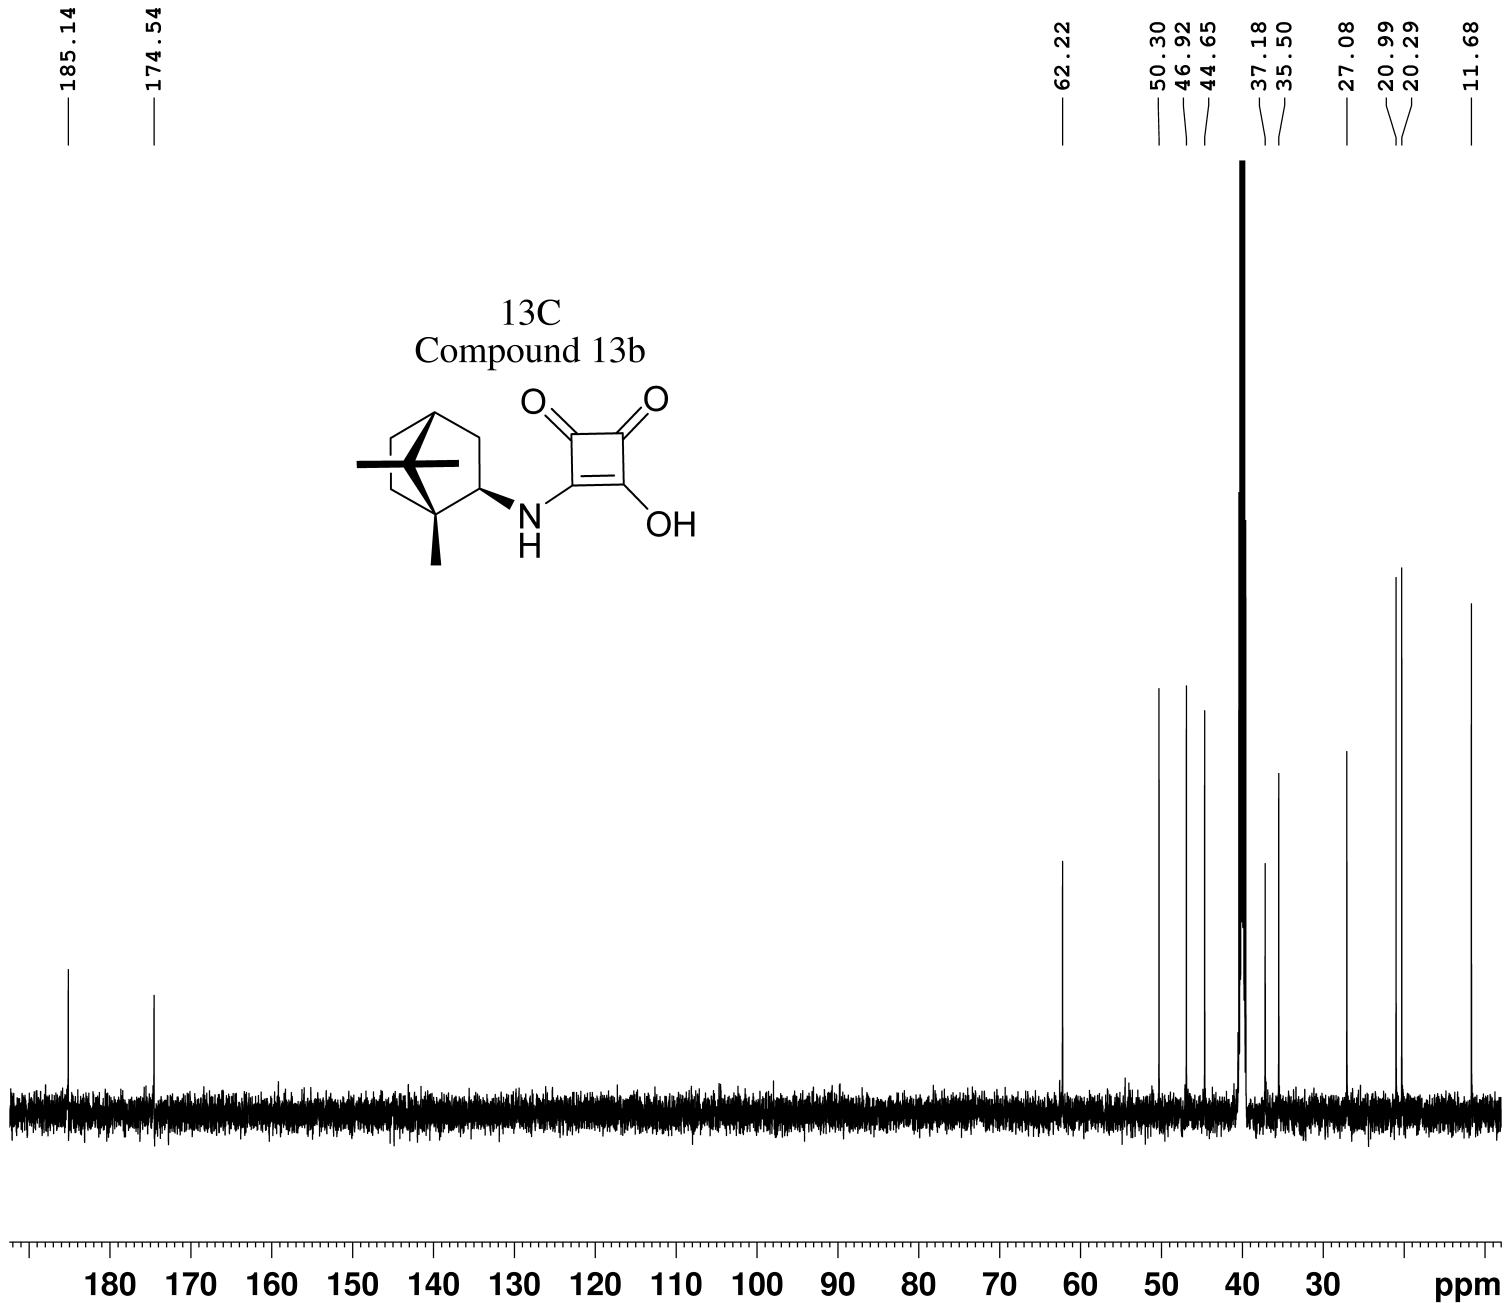

NAME YNC08602B  
EXPNO 12  
PROCNO 1  
Date\_ 20150725  
Time 0.11  
INSTRUM spect  
PROBHD 5 mm PABBO BB-  
PULPROG zgdc30  
TD 32768  
SOLVENT DMSO  
NS 128  
DS 0  
SWH 36057.691 Hz  
FIDRES 1.100393 Hz  
AQ 0.4544329 sec  
RG 2050  
DW 13.867 usec  
DE 6.50 usec  
TE 293.0 K  
D1 1.5000000 sec  
D11 0.0300000 sec  
TD0 1

===== CHANNEL f1 =====  
SFO1 150.9143788 MHz  
NUC1 13C  
P1 9.80 usec  
SI 65536  
SF 150.8977722 MHz  
WDW EM  
SSB 0  
LB 1.00 Hz  
GB 0  
PC 1.40



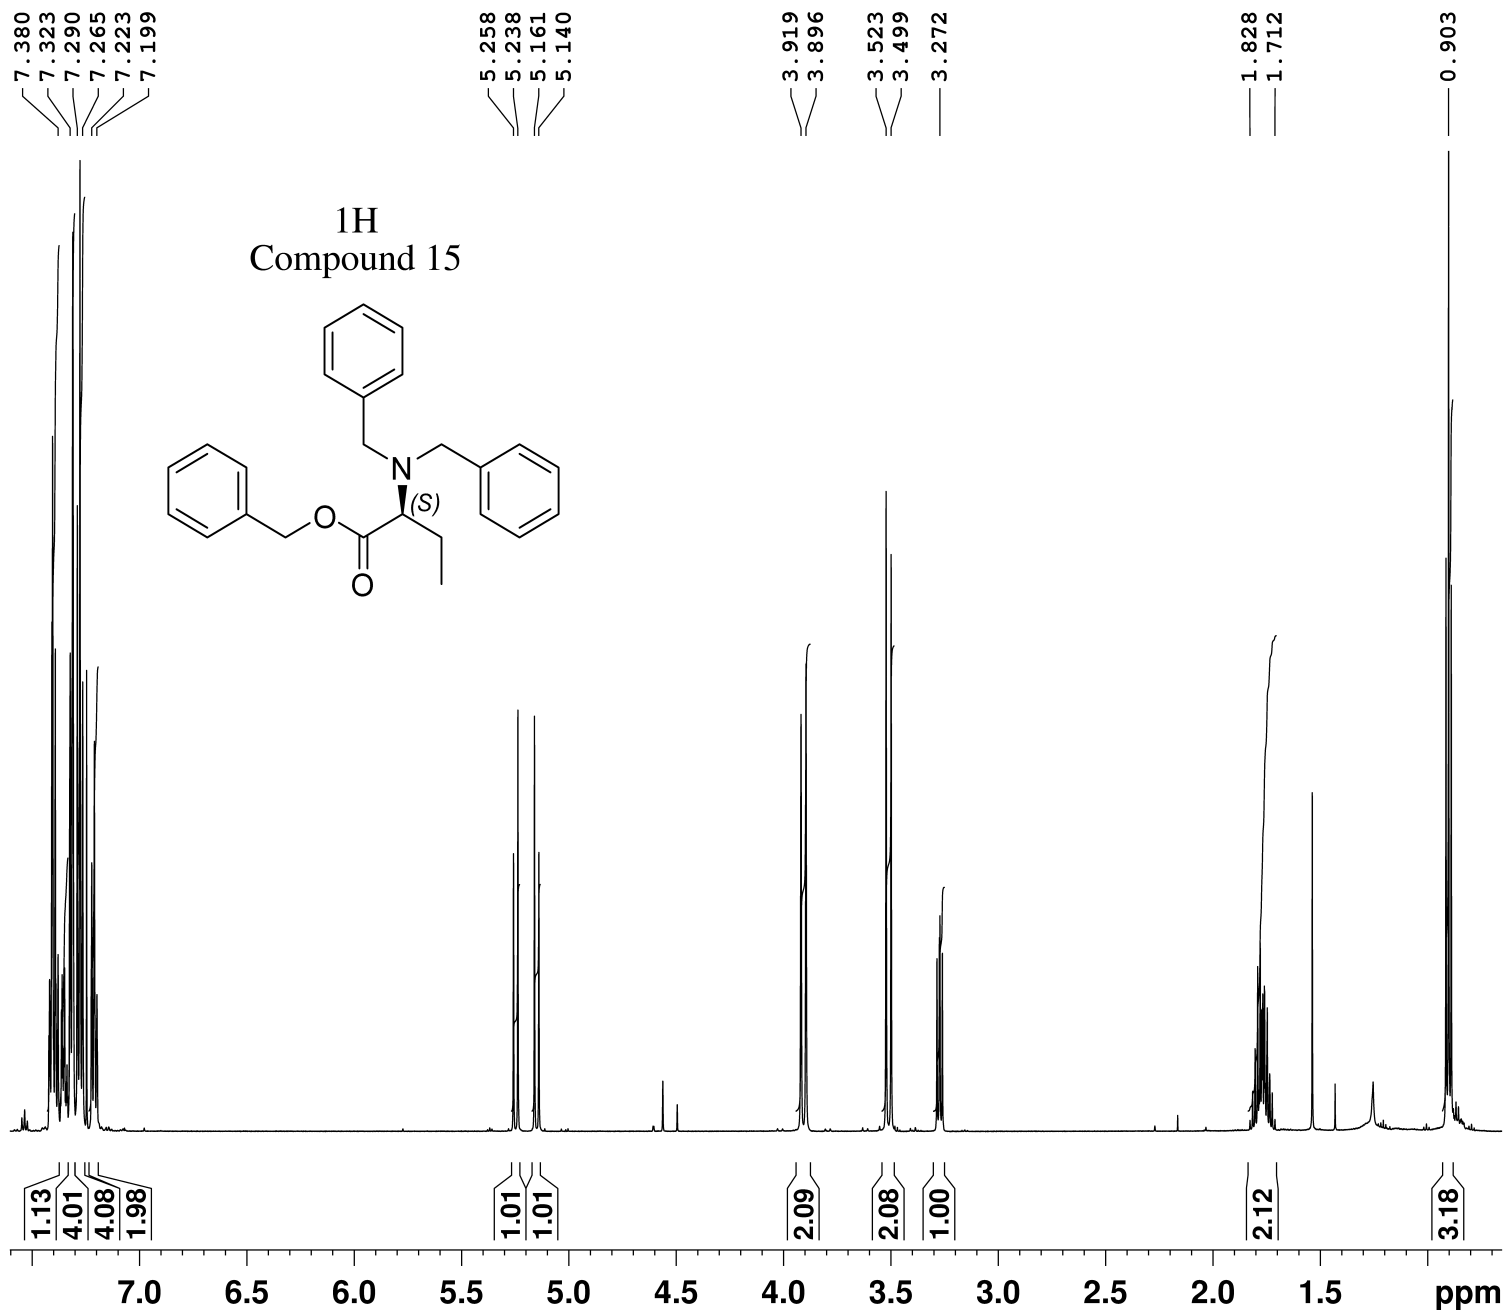

|         |                |
|---------|----------------|
| NAME    | YND01703A      |
| EXPNO   | 11             |
| PROCNO  | 1              |
| Date_   | 20160916       |
| Time    | 14.18          |
| INSTRUM | spect          |
| PROBHD  | 5 mm PABBO BB- |
| PULPROG | zg30           |
| TD      | 32768          |
| SOLVENT | CDC13          |
| NS      | 16             |
| DS      | 0              |
| SWH     | 9615.385 Hz    |
| FIDRES  | 0.293438 Hz    |
| AQ      | 1.7039860 sec  |
| RG      | 161            |
| DW      | 52.000 usec    |
| DE      | 13.95 usec     |
| TE      | 298.0 K        |
| D1      | 1.00000000 sec |
| TD0     | 1              |

  

|       |             |       |
|-------|-------------|-------|
| ===== | CHANNEL f1  | ===== |
| SFO1  | 600.1145608 | MHz   |
| NUC1  | 1H          |       |
| P1    | 10.85       | usec  |
| SI    | 65536       |       |
| SF    | 600.1100224 | MHz   |
| WDW   | EM          |       |
| SSB   | 0           |       |
| LB    | 0.00        | Hz    |
| GB    | 0           |       |
| PC    | 1.00        |       |

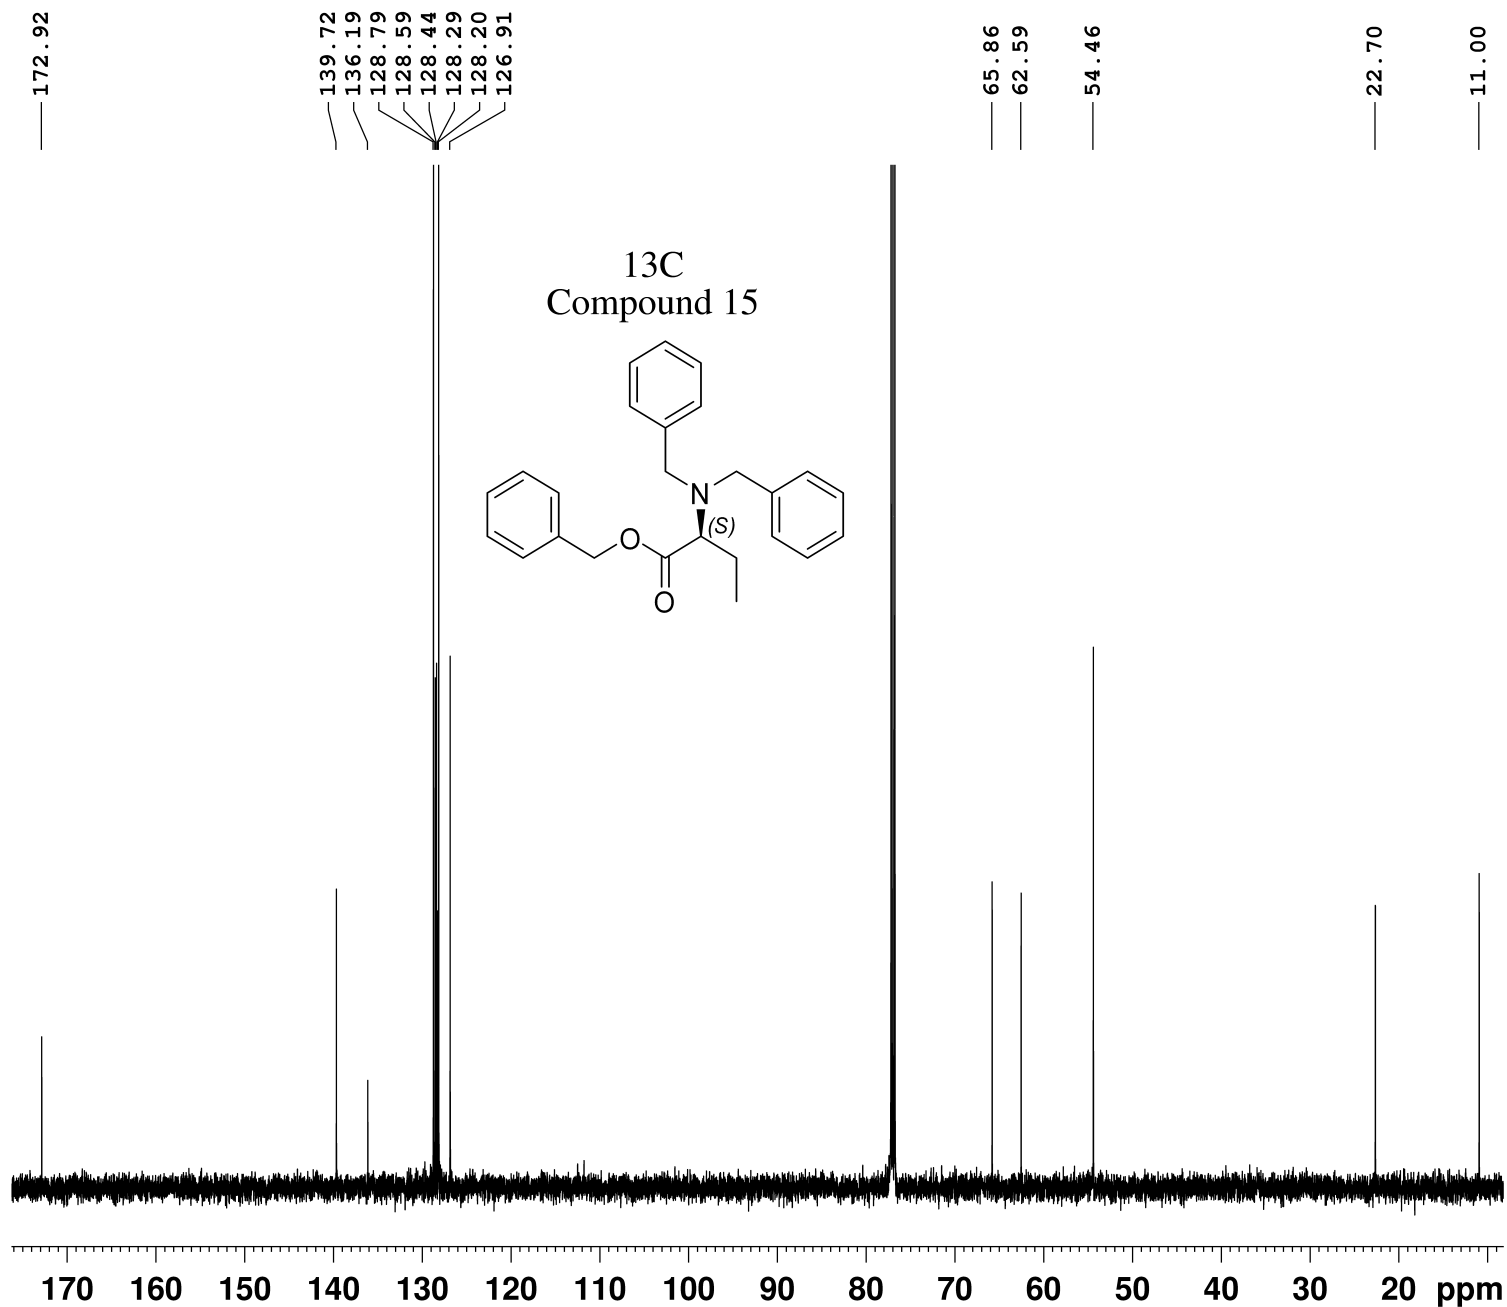

|         |                |      |
|---------|----------------|------|
| NAME    | YND01703A      |      |
| EXPNO   | 12             |      |
| PROCNO  | 1              |      |
| Date_   | 20160916       |      |
| Time    | 14.22          |      |
| INSTRUM | spect          |      |
| PROBHD  | 5 mm PABBO BB- |      |
| PULPROG | zgdc30         |      |
| TD      | 32768          |      |
| SOLVENT | CDC13          |      |
| NS      | 128            |      |
| DS      | 0              |      |
| SWH     | 36057.691      | Hz   |
| FIDRES  | 1.100393       | Hz   |
| AQ      | 0.4544329      | sec  |
| RG      | 2050           |      |
| DW      | 13.867         | usec |
| DE      | 6.50           | usec |
| TE      | 298.0          | K    |
| D1      | 1.50000000     | sec  |
| D11     | 0.03000000     | sec  |
| TD0     | 1              |      |

|                        |             |      |
|------------------------|-------------|------|
| ===== CHANNEL f1 ===== |             |      |
| SFO1                   | 150.9143788 | MHz  |
| NUC1                   | 13C         |      |
| P1                     | 9.80        | usec |
| SI                     | 65536       |      |
| SF                     | 150.8977850 | MHz  |
| WDW                    | EM          |      |
| SSB                    | 0           |      |
| LB                     | 1.00        | Hz   |
| GB                     | 0           |      |
| PC                     | 1.40        |      |

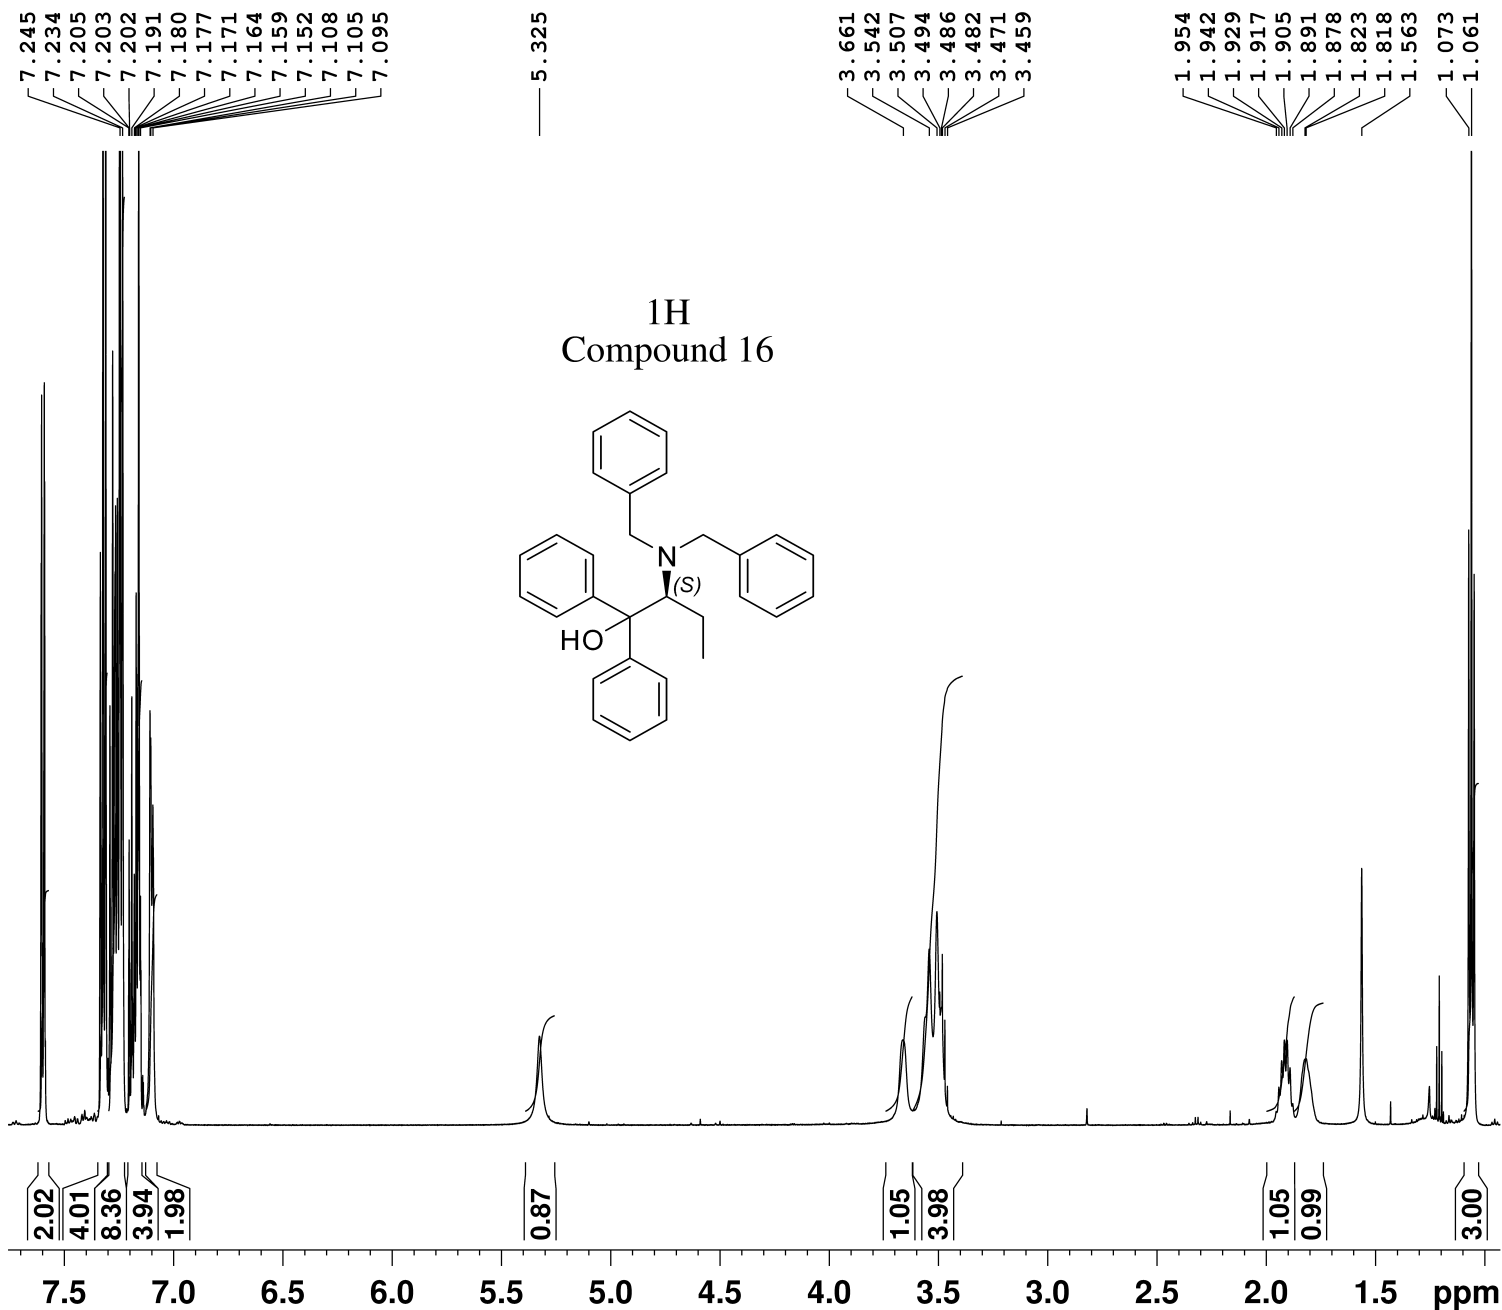

NAME YNC09203A  
EXPNO 11  
PROCNO 1  
Date\_ 20150901  
Time 19.34  
INSTRUM spect  
PROBHD 5 mm PABBO BB-  
PULPROG zg30  
TD 32768  
SOLVENT CDC13  
NS 16  
DS 0  
SWH 9615.385 Hz  
FIDRES 0.293438 Hz  
AQ 1.7039860 sec  
RG 128  
DW 52.000 usec  
DE 13.95 usec  
TE 293.0 K  
D1 1.00000000 sec  
TD0 1

===== CHANNEL f1 =====  
SFO1 600.1145608 MHz  
NUC1 1H  
P1 10.85 usec  
SI 65536  
SF 600.1100236 MHz  
WDW EM  
SSB 0  
LB 0.00 Hz  
GB 0  
PC 1.00

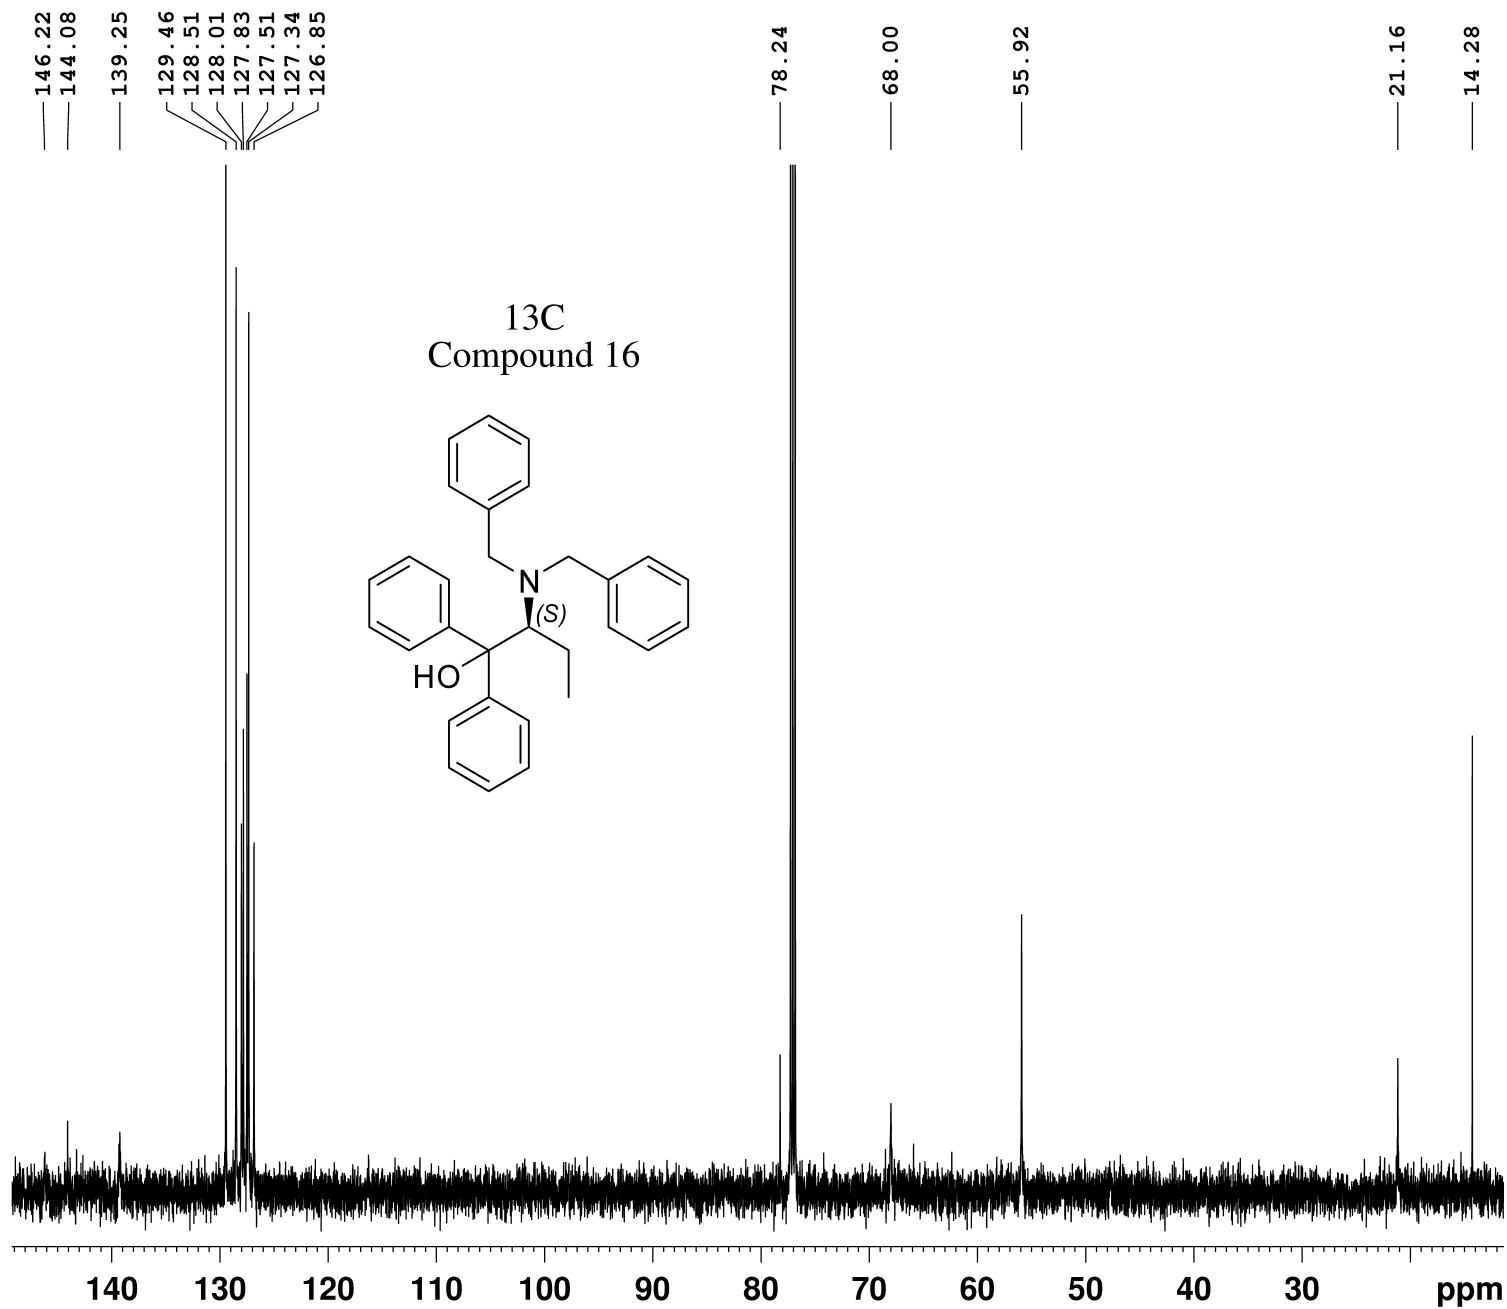

|         |                |
|---------|----------------|
| NAME    | YNC09203A      |
| EXPNO   | 12             |
| PROCNO  | 1              |
| Date_   | 20150901       |
| Time    | 19.38          |
| INSTRUM | spect          |
| PROBHD  | 5 mm PABBO BB- |
| PULPROG | zgdc30         |
| TD      | 32768          |
| SOLVENT | CDC13          |
| NS      | 128            |
| DS      | 0              |
| SWH     | 36057.691 Hz   |
| FIDRES  | 1.100393 Hz    |
| AQ      | 0.4544329 sec  |
| RG      | 2050           |
| DW      | 13.867 usec    |
| DE      | 6.50 usec      |
| TE      | 293.0 K        |
| D1      | 1.50000000 sec |
| D11     | 0.03000000 sec |
| TD0     | 1              |

|       |                 |       |
|-------|-----------------|-------|
| ===== | CHANNEL f1      | ===== |
| SFO1  | 150.9143788 MHz |       |
| NUC1  | 13C             |       |
| P1    | 9.80 usec       |       |
| SI    | 65536           |       |
| SF    | 150.8977800 MHz |       |
| WDW   | EM              |       |
| SSB   | 0               |       |
| LB    | 1.00 Hz         |       |
| GB    | 0               |       |
| PC    | 1.40            |       |

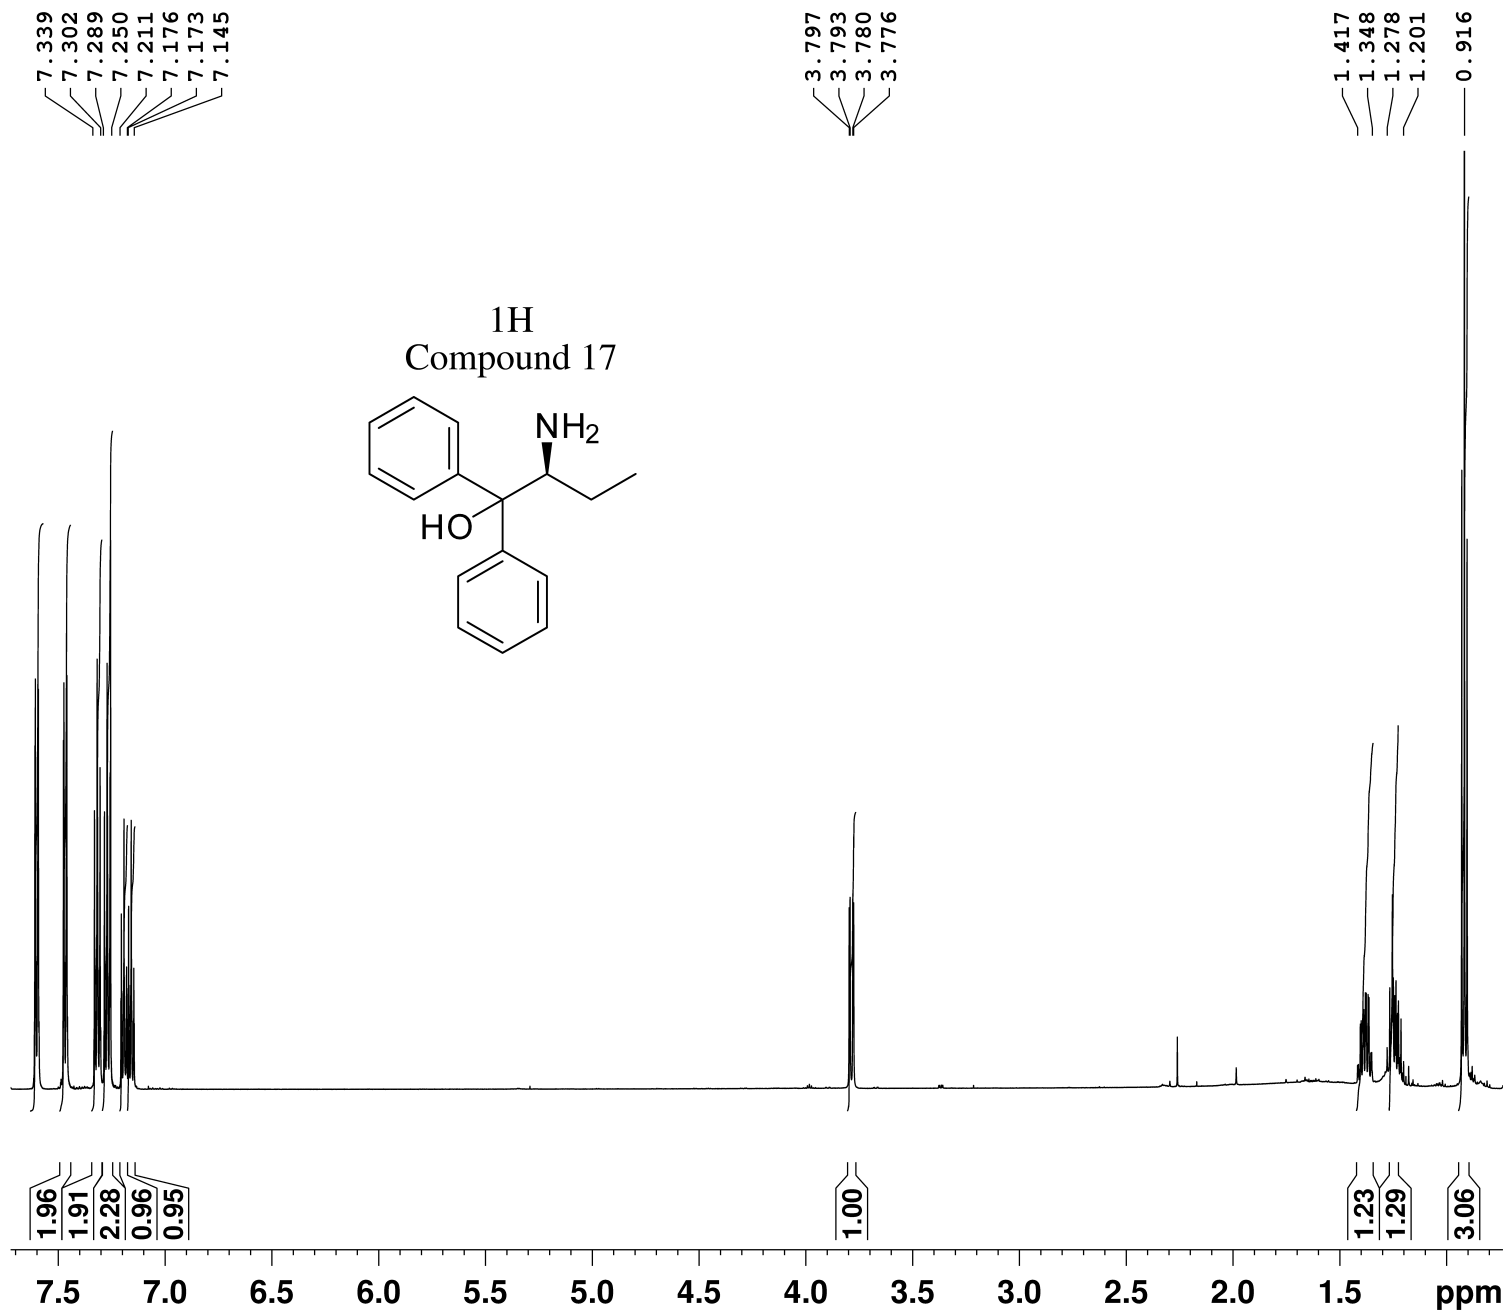

|         |                 |
|---------|-----------------|
| NAME    | YNC09604A       |
| EXPNO   | 11              |
| PROCNO  | 1               |
| Date_   | 20150930        |
| Time    | 21.23 h         |
| INSTRUM | spect           |
| PROBHD  | Z847801_0047 (  |
| PULPROG | zg30            |
| TD      | 32768           |
| SOLVENT | CDC13           |
| NS      | 32              |
| DS      | 0               |
| SWH     | 9615.385 Hz     |
| FIDRES  | 0.293438 Hz     |
| AQ      | 1.7039860 sec   |
| RG      | 181             |
| DW      | 52.000 usec     |
| DE      | 13.95 usec      |
| TE      | 293.0 K         |
| D1      | 1.00000000 sec  |
| TD0     | 1               |
| SFO1    | 600.1145608 MHz |
| NUC1    | 1H              |
| P1      | 10.85 usec      |
| SI      | 65536           |
| SF      | 600.1100185 MHz |
| WDW     | EM              |
| SSB     | 0               |
| LB      | 0.00 Hz         |
| GB      | 0               |
| PC      | 1.00            |

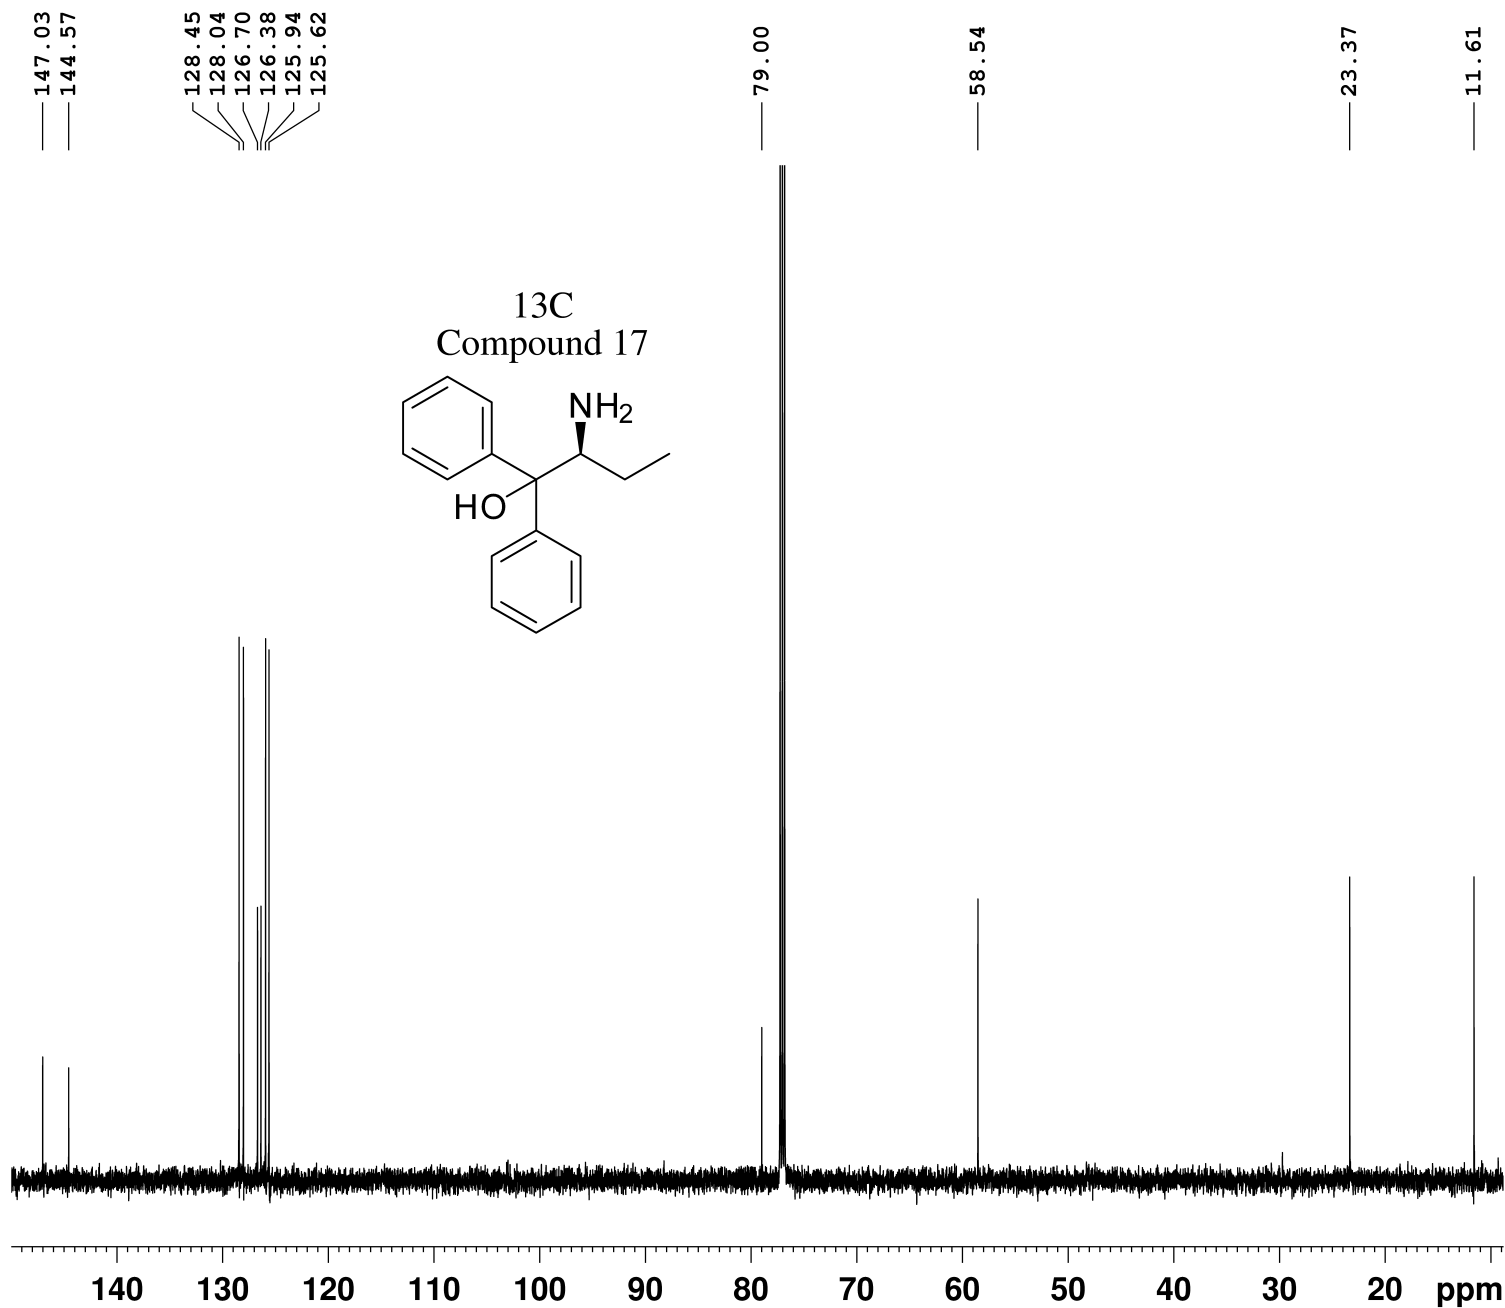

|         |                 |
|---------|-----------------|
| NAME    | YNC09604A       |
| EXPNO   | 12              |
| PROCNO  | 1               |
| Date_   | 20150930        |
| Time    | 21.28 h         |
| INSTRUM | spect           |
| PROBHD  | Z847801_0047 (  |
| PULPROG | zgdc30          |
| TD      | 32768           |
| SOLVENT | CDC13           |
| NS      | 128             |
| DS      | 0               |
| SWH     | 36057.691 Hz    |
| FIDRES  | 1.100393 Hz     |
| AQ      | 0.4544329 sec   |
| RG      | 2050            |
| DW      | 13.867 usec     |
| DE      | 6.50 usec       |
| TE      | 293.0 K         |
| D1      | 1.50000000 sec  |
| D11     | 0.03000000 sec  |
| TD0     | 1               |
| SFO1    | 150.9143788 MHz |
| NUC1    | 13C             |
| P1      | 9.80 usec       |
| SI      | 65536           |
| SF      | 150.8977800 MHz |
| WDW     | EM              |
| SSB     | 0               |
| LB      | 1.00 Hz         |
| GB      | 0               |
| PC      | 1.40            |

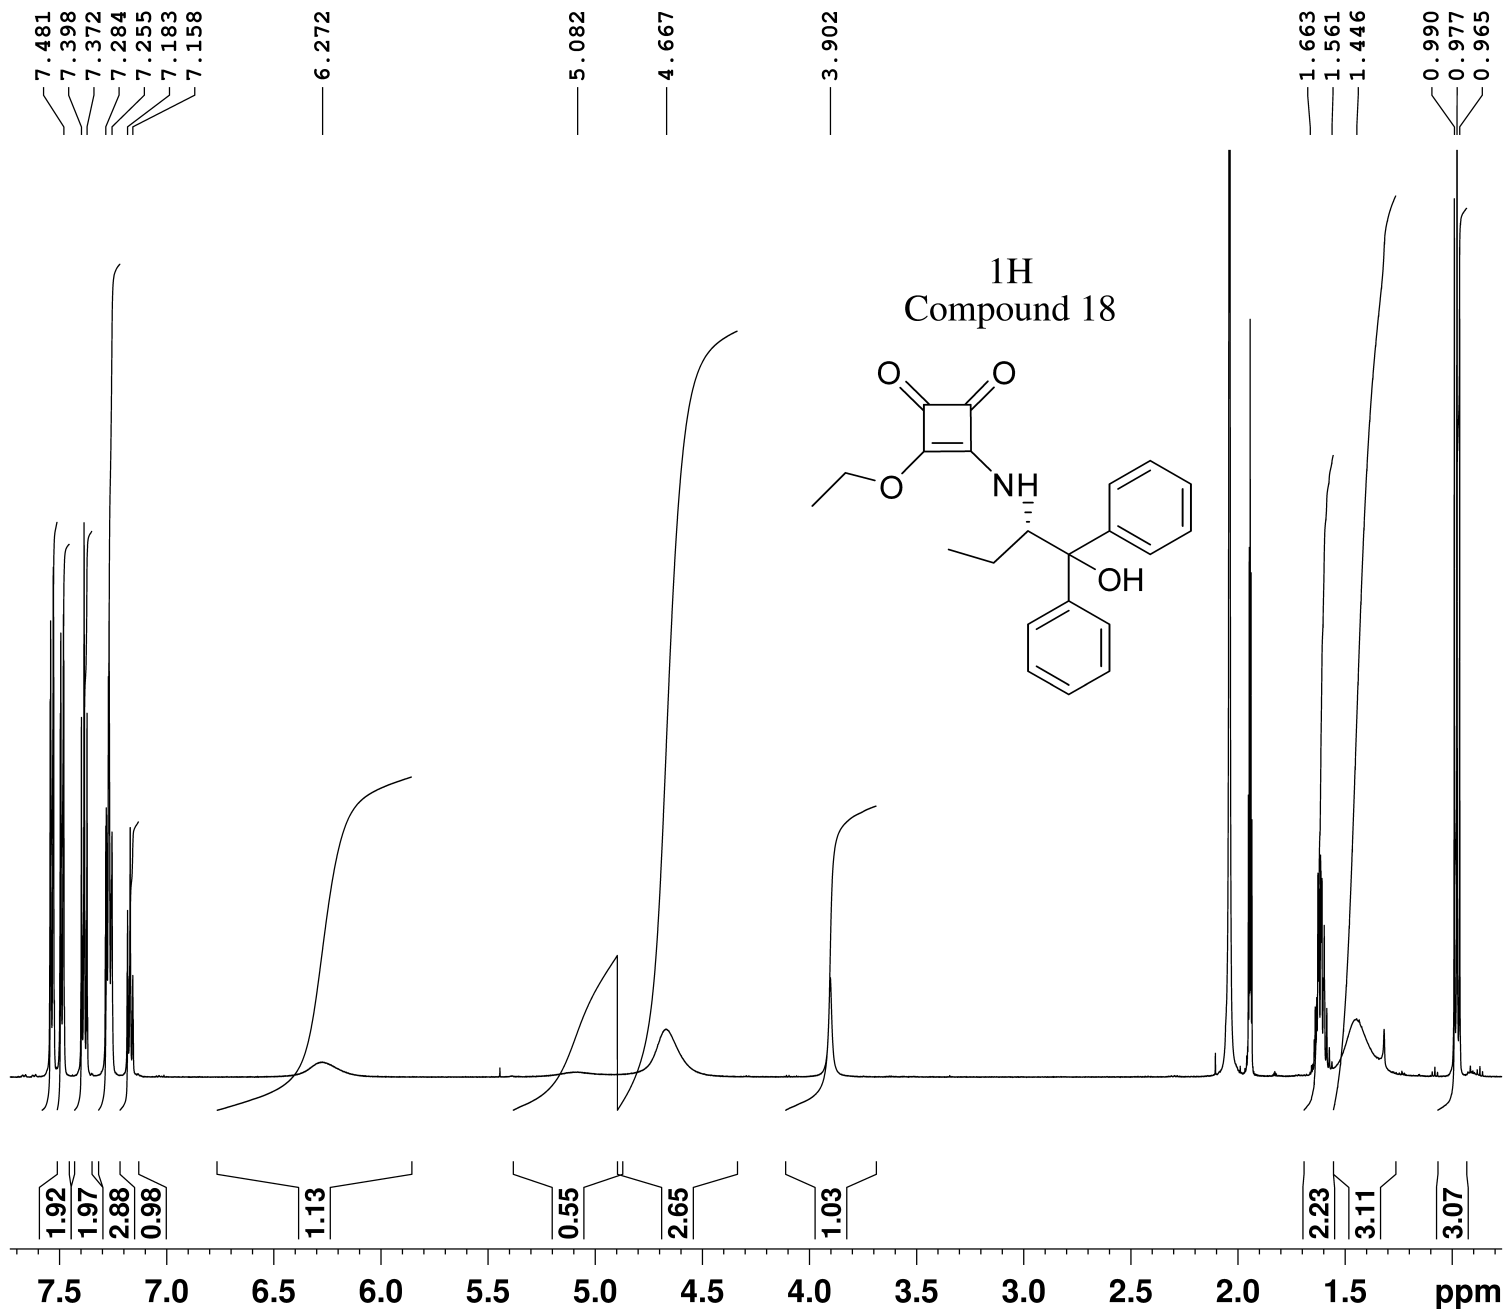

|         |                |
|---------|----------------|
| NAME    | YNC10405C      |
| EXPNO   | 71             |
| PROCNO  | 1              |
| Date_   | 20160209       |
| Time    | 15.23          |
| INSTRUM | spect          |
| PROBHD  | 5 mm PABBO BB- |
| PULPROG | zg30           |
| TD      | 32768          |
| SOLVENT | CD3CN          |
| NS      | 16             |
| DS      | 0              |
| SWH     | 9615.385 Hz    |
| FIDRES  | 0.293438 Hz    |
| AQ      | 1.7039860 sec  |
| RG      | 161            |
| DW      | 52.000 usec    |
| DE      | 13.95 usec     |
| TE      | 348.1 K        |
| D1      | 1.00000000 sec |
| TD0     | 1              |

  

|                        |                 |
|------------------------|-----------------|
| ===== CHANNEL f1 ===== |                 |
| SFO1                   | 600.1145608 MHz |
| NUC1                   | <sup>1</sup> H  |
| P1                     | 10.85 usec      |
| SI                     | 65536           |
| SF                     | 600.1100139 MHz |
| WDW                    | no              |
| SSB                    | 0               |
| LB                     | 0.00 Hz         |
| GB                     | 0               |
| PC                     | 1.00            |

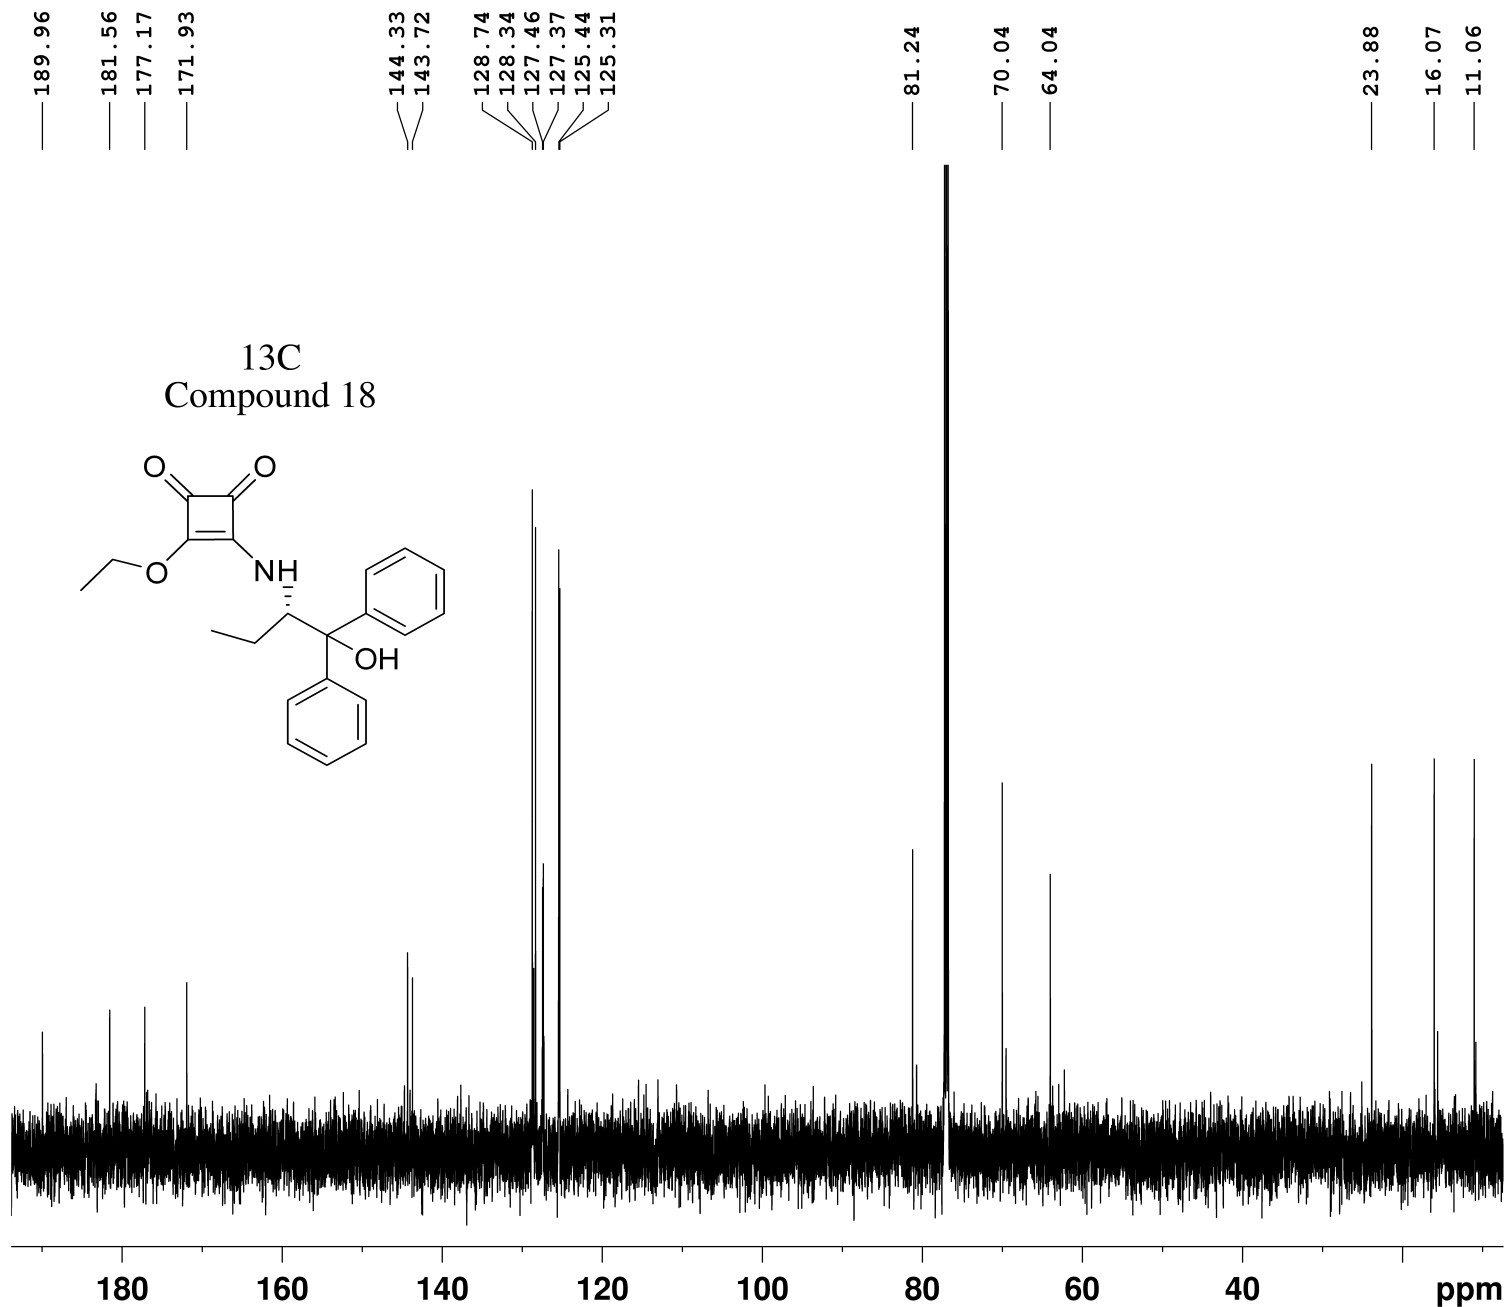

|         |                 |
|---------|-----------------|
| NAME    | YNC10405A       |
| EXPNO   | 12              |
| PROCNO  | 1               |
| Date_   | 20151217        |
| Time    | 14.58 h         |
| INSTRUM | spect           |
| PROBHD  | Z847801_0047 (  |
| PULPROG | zgdc30          |
| TD      | 32768           |
| SOLVENT | CDC13           |
| NS      | 128             |
| DS      | 0               |
| SWH     | 36057.691 Hz    |
| FIDRES  | 1.100393 Hz     |
| AQ      | 0.4544329 sec   |
| RG      | 2050            |
| DW      | 13.867 usec     |
| DE      | 6.50 usec       |
| TE      | 293.1 K         |
| D1      | 1.50000000 sec  |
| D11     | 0.03000000 sec  |
| TD0     | 1               |
| SFO1    | 150.9143788 MHz |
| NUC1    | <sup>13</sup> C |
| P1      | 9.80 usec       |
| SI      | 65536           |
| SF      | 150.8977837 MHz |
| WDW     | EM              |
| SSB     | 0               |
| LB      | 1.00 Hz         |
| GB      | 0               |
| PC      | 1.40            |



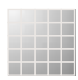SHIMADZU  
LabSolutions

## Analysis Report

## &lt;Sample Information&gt;

Sample Name : phprop  
Sample ID : phprop  
Filename : YNC05002\_01.dat.gcd  
Method Filename : Yana1a.met  
Batch Filename :  
Vial # : 3  
Injection Volume : 1 uL  
Date Acquired : 12/10/2014 5:09:59 PM  
Date Processed : 11/1/2021 1:52:33 PM  
Sample Type : ME

Level : 1

## &lt;Chromatogram&gt;

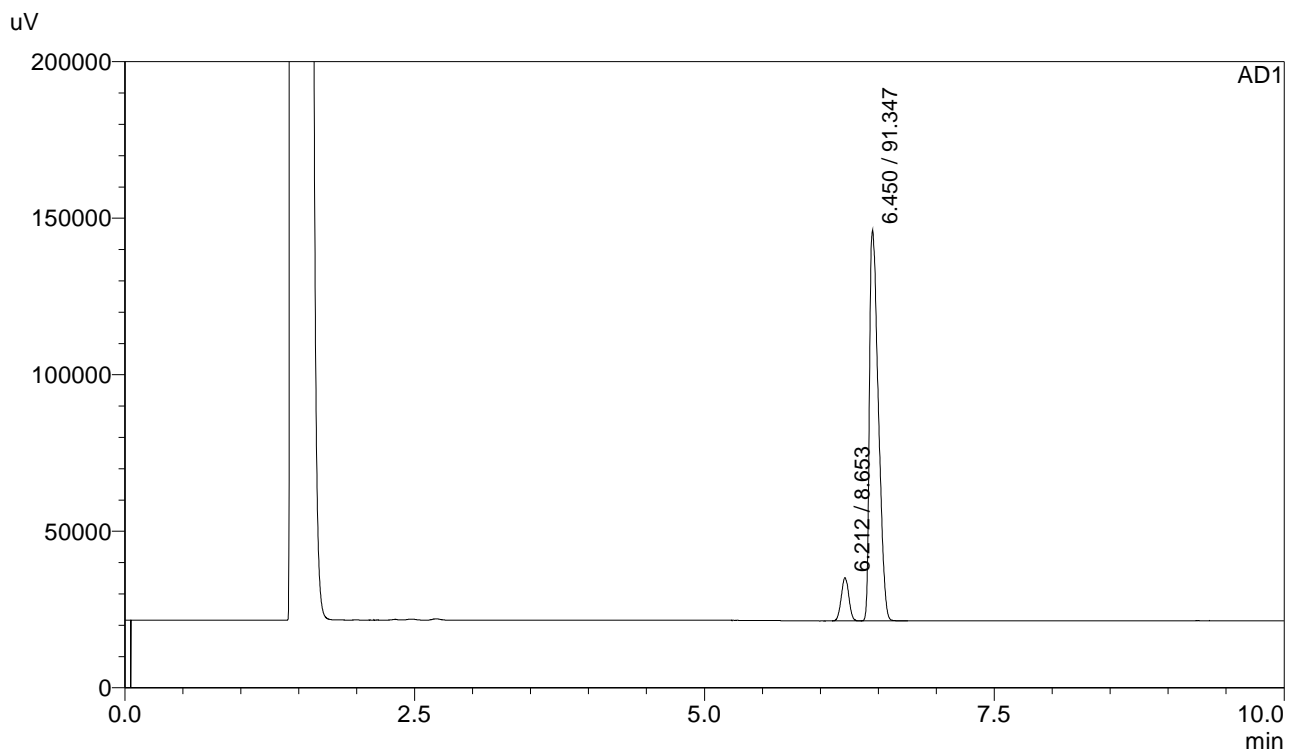

## &lt;Peak Table&gt;

AD1

| Peak# | Name | Area%   | Ret. Time | Area   | Height |
|-------|------|---------|-----------|--------|--------|
| 1     |      | 8.653   | 6.212     | 63354  | 13813  |
| 2     |      | 91.347  | 6.450     | 668762 | 124379 |
| Total |      | 100.000 |           | 732116 | 138192 |

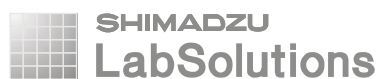

# Analysis Report

## <Sample Information>

Sample Name : clphpr  
Sample ID : clphpr  
Filename : YNC11202\_03.dat  
Method Filename : Yana1a.met  
Batch Filename :  
Vial # : 3  
Injection Volume : 1 uL  
Date Acquired : 2/18/2016 12:18:30 PM  
Date Processed : 11/1/2021 2:55:38 PM  
Sample Type : ME

Level : 1

## <Chromatogram>

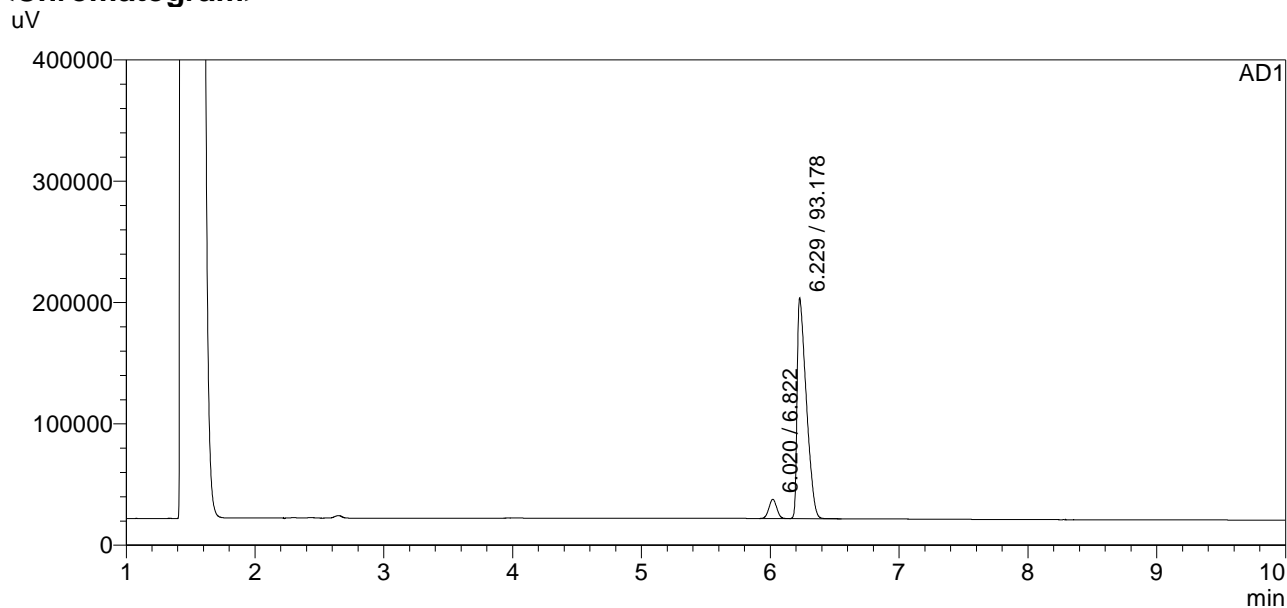

## <Peak Table>

AD1

| Peak# | Name | Area%   | Ret. Time | Area   | Height |
|-------|------|---------|-----------|--------|--------|
| 1     |      | 6.822   | 6.020     | 66449  | 15827  |
| 2     |      | 93.178  | 6.229     | 907649 | 181887 |
| Total |      | 100.000 |           | 974098 | 197714 |

GC: Table 2, Entry 3

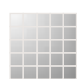SHIMADZU  
LabSolutions

## Analysis Report

## &lt;Sample Information&gt;

Sample Name : clphpr  
 Sample ID : clphpr  
 Filename : YNC06603\_01.dat  
 Method Filename : Yana1a.met  
 Batch Filename :  
 Vial # : 2  
 Injection Volume : 1 uL  
 Date Acquired : 2/12/2015 11:32:41 AM  
 Date Processed : 11/1/2021 3:16:33 PM  
 Sample Type : ME

Level : 1

## &lt;Chromatogram&gt;

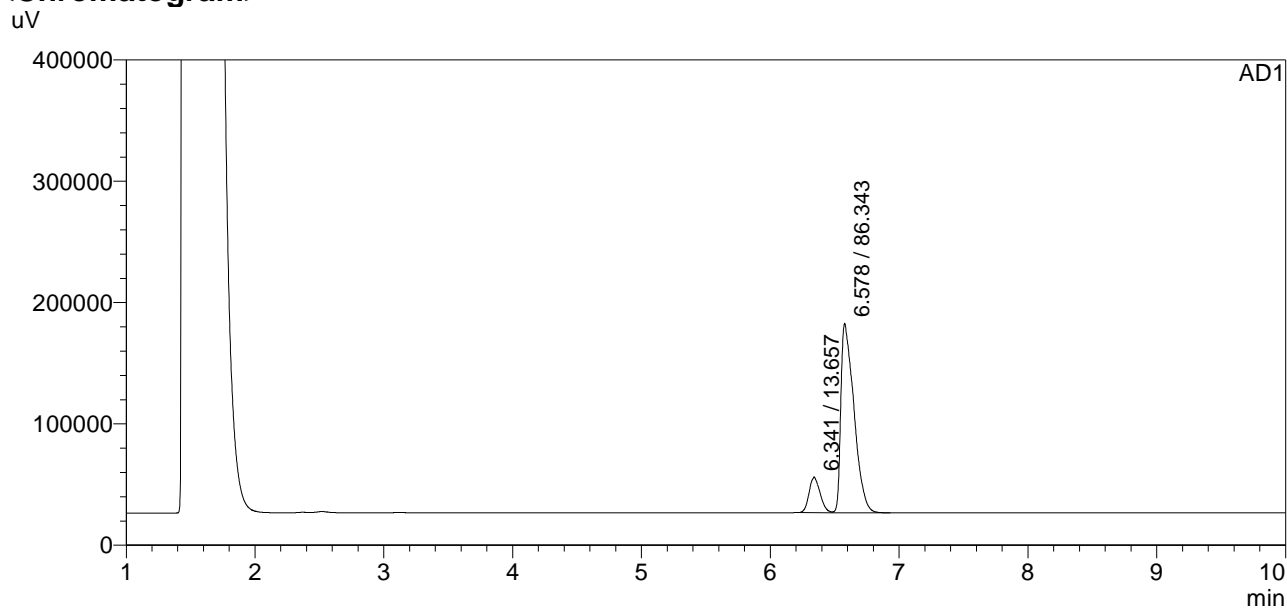

## &lt;Peak Table&gt;

AD1

| Peak# | Name | Area%   | Ret. Time | Area    | Height |
|-------|------|---------|-----------|---------|--------|
| 1     |      | 13.657  | 6.341     | 174014  | 29156  |
| 2     |      | 86.343  | 6.578     | 1100147 | 156002 |
| Total |      | 100.000 |           | 1274161 | 185158 |

GC: Table 2, Entry 4

SHIMADZU  
LabSolutions

## Analysis Report

## &lt;Sample Information&gt;

Sample Name : yana  
 Sample ID : yana  
 Filename : YNC06703\_03.dat  
 Method Filename : Yana1a.met  
 Batch Filename :  
 Vial # : 3  
 Injection Volume : 1 uL  
 Date Acquired : 2/12/2015 12:33:51 PM  
 Date Processed : 11/1/2021 3:22:39 PM  
 Sample Type : ME

Level : 1

## &lt;Chromatogram&gt;

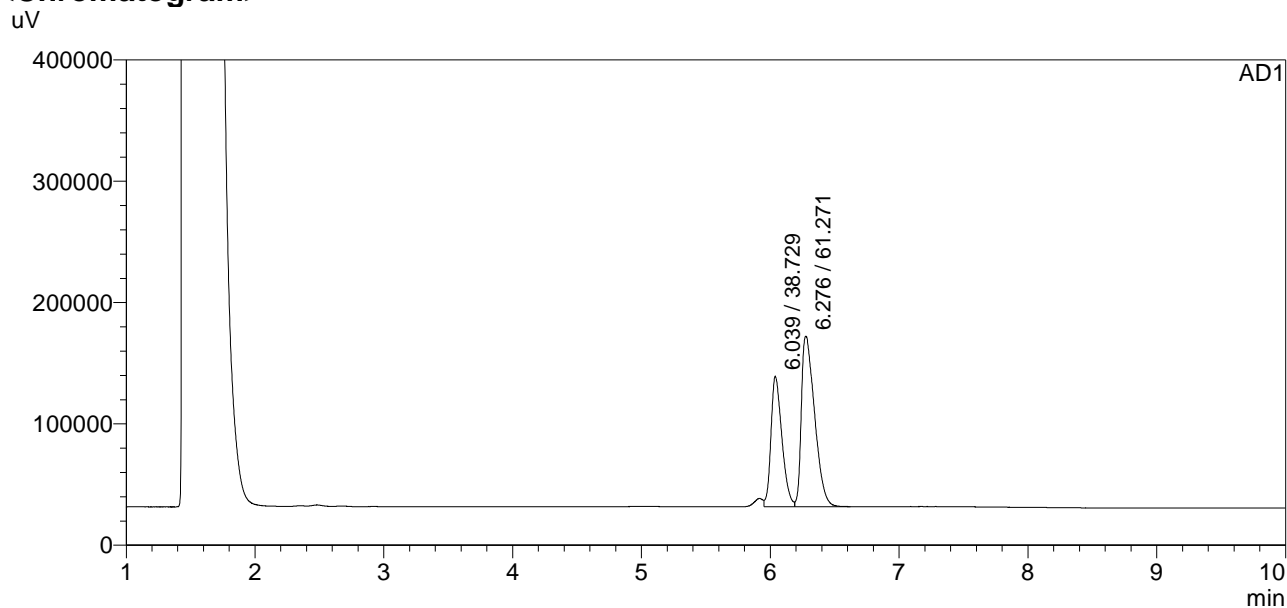

## &lt;Peak Table&gt;

AD1

| Peak# | Name | Area%   | Ret. Time | Area    | Height |
|-------|------|---------|-----------|---------|--------|
| 1     |      | 38.729  | 6.039     | 635549  | 107584 |
| 2     |      | 61.271  | 6.276     | 1005468 | 140261 |
| Total |      | 100.000 |           | 1641017 | 247845 |

GC: Table 2, Entry 5

SHIMADZU  
LabSolutions

## Analysis Report

## &lt;Sample Information&gt;

Sample Name : clphpr  
 Sample ID : clphpr  
 Filename : YNC10703\_01.dat  
 Method Filename : Yana1a.met  
 Batch Filename :  
 Vial # : 3  
 Injection Volume : 1 uL  
 Date Acquired : 1/15/2016 1:43:49 PM  
 Date Processed : 11/1/2021 3:29:53 PM  
 Sample Type : ME

Level : 1

## &lt;Chromatogram&gt;

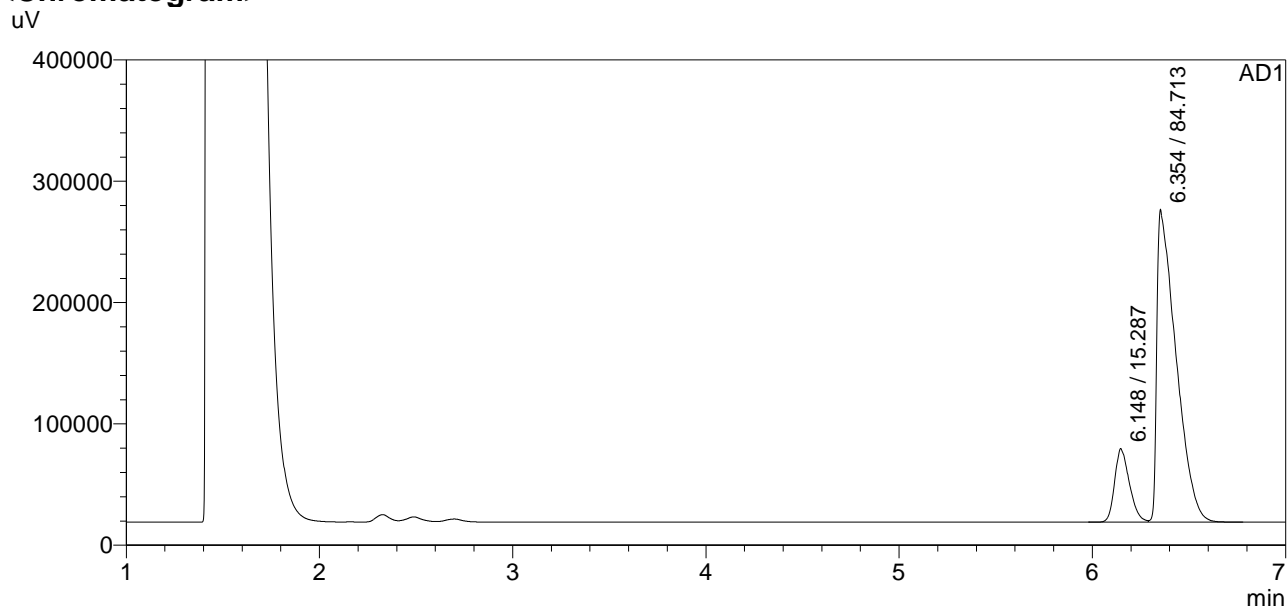

## &lt;Peak Table&gt;

AD1

| Peak# | Name | Area%   | Ret. Time | Area    | Height |
|-------|------|---------|-----------|---------|--------|
| 1     |      | 15.287  | 6.148     | 319915  | 60507  |
| 2     |      | 84.713  | 6.354     | 1772820 | 257371 |
| Total |      | 100.000 |           | 2092735 | 317878 |

GC: Table 2, Entry 6

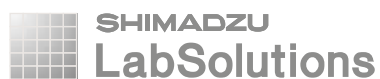

# Analysis Report

## <Sample Information>

Sample Name : clphpr  
 Sample ID : clphpr  
 Filename : YNC11602\_01.dat  
 Method Filename : Yana1a.met  
 Batch Filename :  
 Vial # : 2  
 Injection Volume : 1 uL  
 Date Acquired : 3/2/2016 11:14:36 AM  
 Date Processed : 11/1/2021 3:37:05 PM  
 Sample Type : ME

Level : 1

## <Chromatogram>

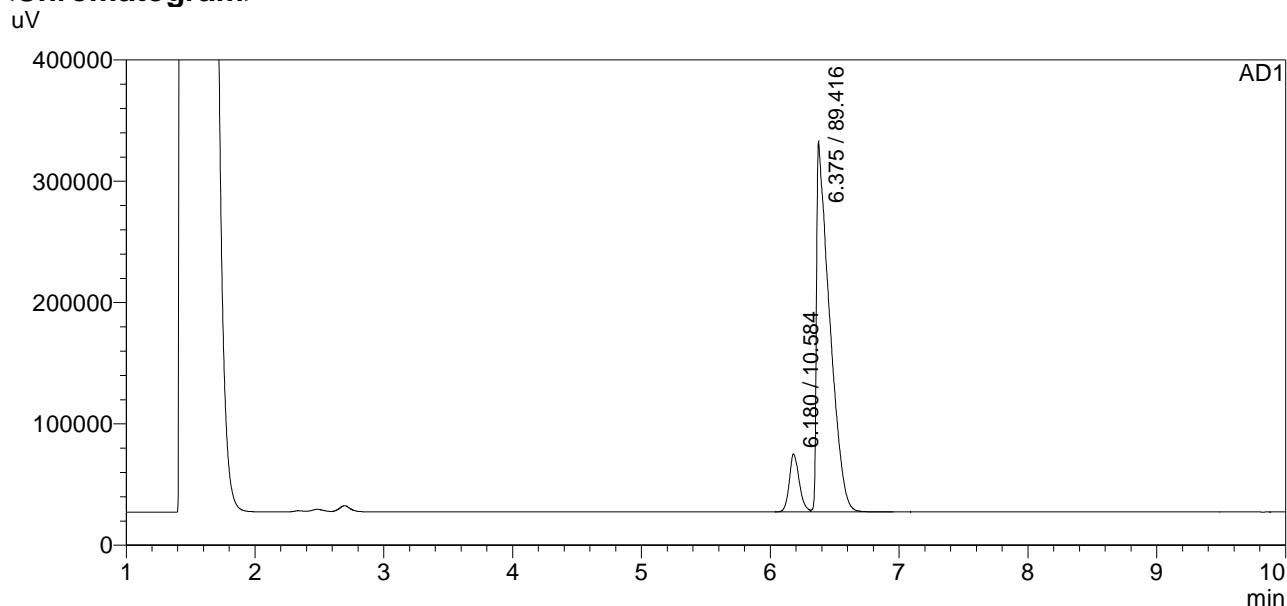

## <Peak Table>

AD1

| Peak# | Name | Area%   | Ret. Time | Area    | Height |
|-------|------|---------|-----------|---------|--------|
| 1     |      | 10.584  | 6.180     | 256097  | 47861  |
| 2     |      | 89.416  | 6.375     | 2163605 | 304062 |
| Total |      | 100.000 |           | 2419702 | 351923 |
